# Supplementary material
Source: ML conference proceedings conference paper supplement (https://openreview.net/forum?id=fxxMReBRhi)
Supplement: supplementary_material [file ATLAS_static.xlsx]

## Sheet: biological
name	N	E	first author (year)	reference	description
genetic_yeast	4319	64691	Constanzo (2010)	link	Interactions between genes in yeast
metabolic_worm	453	2025	Duch (2005)	link	A metabolic interactions network of C. elegans
molecular_hbond	164	874	Martin (2011)	link	Hydrogen bond network of human GPX4
molecular_vdw	248	1003	Martin (2011)	link	Van der Waals contact network of human TIM barrel
molecular_yeastphosphorylation	1405	4070	Bhardwaj (2010)	link	Phosphorylation network for yeast
PPI_barabasi2015human	16418	235566	Menche (2015)	link	Interactions between proteins in H. sapiens
PPI_barabasi2016human	16656	243592	Menche (2015)	link	Interactions between proteins in H. sapiens
PPI_BioGRIDarabidopsis	7322	28394	Stark (2006)	link	Interactions between proteins in A. thaliana (BioGRID v3.4.143)
PPI_BioGRIDfly	7172	23696	Stark (2006)	link	Interactions between proteins in D. melanogaster (BioGRID v3.4.143)
PPI_BioGRIDhuman	12502	64993	Stark (2006)	link	Interactions between proteins in H. sapiens (BioGRID v3.4.143)
PPI_BioGRIDmouse	1675	2659	Stark (2006)	link	Interactions between proteins in M. musculus (BioGRID v3.4.143)
PPI_BioGRIDspombe	1629	3164	Stark (2006)	link	Interactions between proteins in C. elegans (BioGRID v3.4.143)
PPI_BioGRIDworm	2906	5259	Stark (2006)	link	Interactions between proteins in S. cerevisiae (BioGRID v3.4.143)
PPI_BioGRIDyeast	4814	27329	Stark (2006)	link	Interactions between proteins in S. cerevisiae (BioGRID v3.4.143)
PPI_braun2011arabidopsis	4519	10721	Braun (2011)	link	Interactions between proteins in A. thaliana (Plant Interactome Database v1)
PPI_DIPyeast	4626	14801	Colizza (2015)	link	Network of the yeast Saccharomyces cerevisae extracted with different experimental techniques and collected at the Database of Interacting Proteins
PPI_hein2015human	6144	28307	Hein (2015)	link	Interactions between proteins in H. sapiens
PPI_HuRIhumanIII	7738	43889	unpublished	link	Interactions between proteins in H. sapiens
PPI_huttlin2017humanBioplex	10901	56519	Huttlin (2017)	link	Interactions between proteins in H. sapiens
PPI_menche2015human	13329	138356	Menche (2015)	link	Interactions between proteins in H. sapiens
PPI_mosca2013humanInteractome3D	2733	4982	Mosca (2013)	link	Interactions between proteins in H. sapiens
PPI_rolland2014humanII	4182	13343	Rolland (2014)	link	Interactions between proteins in H. sapiens
PPI_rolland2014humanLitBM	4919	9876	Rolland (2014)	link	Interactions between proteins in H. sapiens
PPI_yu2008yeast	1647	2518	Yu (2008)	link	Interactions between proteins in S. cerevisiae
transcription_ecoli	328	456	Shen-Orr (2002)	link	E. coli transcription network (2002)
transcription_ecoli2010	1373	2952	Bhardwaj (2010)	link	Transcriptional regulatory network for E. coli
transcription_human2010	3101	6842	Bhardwaj (2010)	link	Transcriptional regulatory network for Human
transcription_mouse2010	1185	2389	Bhardwaj (2010)	link	Transcriptional regulatory network for mouse
transcription_mtuberculosis2010	687	825	Bhardwaj (2010)	link	Transcriptional regulatory network for M. tuberculosis
transcription_rat2010	524	1081	Bhardwaj (2010)	link	Transcriptional regulatory network for rat
transcription_yeast	664	1065	Milo (2002)	link	Yeast transcription network (2002)
transcription_yeast2010	4441	12864	Bhardwaj (2010)	link	Transcriptional regulatory network for yeast

## Sheet: connectome
name	N	E	first author (year)	reference	description	scale
connectome_catconnectome	65	730	Scannell (1995)	link	Mesoscale connectome of cat cortex	meso
connectome_catconnectome2	52	515	Scannell (1999)	link	Mesoscale connectome of cat cortex	meso
connectome_catconnectome3	95	1170	Scannell (1999)	link	Mesoscale connectome of cat cortex and thalamus	meso
connectome_drosophila_CREMI_A	77	160		link	Microscale connectome of drosophila brain - CREMI training volume dataset A	micro
connectome_drosophila_CREMI_B	336	410		link	Microscale connectome of drosophila brain - CREMI training volume dataset B	micro
connectome_drosophila_CREMI_C	518	582		link	Microscale connectome of drosophila brain - CREMI training volume dataset C	micro
connectome_drosophila_hemibrain	21662	2779398	Xu (2020)	link	Microscale connectome of roughly half of the drosophila brain	micro
connectome_drosophilalarva_mushroombody	365	12551	Eichler (2017)	link	Microscale connectome of drosophila larval mushroom body	micro
connectome_drosophilasynaptic	323	2490	Takemura (2013)	link	Microscale connectome of drosophila optic medulla	micro
connectome_drosophilasynaptic2	1770	8905	Takemura (2013)	link	Microscale connectome of drosophila optic medulla	micro
connectome_human_vandenheuvel100307	82	1166	Van Den Heuvel (2015)	link	Tractography-based connectivity matrix constructed from the T1 and diffusion weighted imaging data of the Human Connectome Project (WU-Minn HCP Data - 1200 Subjects release)	macro
connectome_human_vandenheuvel100408	82	1156	Van Den Heuvel (2015)	link	Tractography-based connectivity matrix constructed from the T1 and diffusion weighted imaging data of the Human Connectome Project (WU-Minn HCP Data - 1200 Subjects release)	macro
connectome_human_vandenheuvel101006	82	1301	Van Den Heuvel (2015)	link	Tractography-based connectivity matrix constructed from the T1 and diffusion weighted imaging data of the Human Connectome Project (WU-Minn HCP Data - 1200 Subjects release)	macro
connectome_human_vandenheuvel101107	82	1124	Van Den Heuvel (2015)	link	Tractography-based connectivity matrix constructed from the T1 and diffusion weighted imaging data of the Human Connectome Project (WU-Minn HCP Data - 1200 Subjects release)	macro
connectome_human_vandenheuvel101309	82	1152	Van Den Heuvel (2015)	link	Tractography-based connectivity matrix constructed from the T1 and diffusion weighted imaging data of the Human Connectome Project (WU-Minn HCP Data - 1200 Subjects release)	macro
connectome_human_vandenheuvel101410	82	1147	Van Den Heuvel (2015)	link	Tractography-based connectivity matrix constructed from the T1 and diffusion weighted imaging data of the Human Connectome Project (WU-Minn HCP Data - 1200 Subjects release)	macro
connectome_human_vandenheuvel101915	82	1123	Van Den Heuvel (2015)	link	Tractography-based connectivity matrix constructed from the T1 and diffusion weighted imaging data of the Human Connectome Project (WU-Minn HCP Data - 1200 Subjects release)	macro
connectome_human_vandenheuvel102008	82	1050	Van Den Heuvel (2015)	link	Tractography-based connectivity matrix constructed from the T1 and diffusion weighted imaging data of the Human Connectome Project (WU-Minn HCP Data - 1200 Subjects release)	macro
connectome_human_vandenheuvel102311	82	1107	Van Den Heuvel (2015)	link	Tractography-based connectivity matrix constructed from the T1 and diffusion weighted imaging data of the Human Connectome Project (WU-Minn HCP Data - 1200 Subjects release)	macro
connectome_human_vandenheuvel102816	82	1241	Van Den Heuvel (2015)	link	Tractography-based connectivity matrix constructed from the T1 and diffusion weighted imaging data of the Human Connectome Project (WU-Minn HCP Data - 1200 Subjects release)	macro
connectome_human_vandenheuvel103111	82	1281	Van Den Heuvel (2015)	link	Tractography-based connectivity matrix constructed from the T1 and diffusion weighted imaging data of the Human Connectome Project (WU-Minn HCP Data - 1200 Subjects release)	macro
connectome_human_vandenheuvel103414	82	1279	Van Den Heuvel (2015)	link	Tractography-based connectivity matrix constructed from the T1 and diffusion weighted imaging data of the Human Connectome Project (WU-Minn HCP Data - 1200 Subjects release)	macro
connectome_human_vandenheuvel103515	82	811	Van Den Heuvel (2015)	link	Tractography-based connectivity matrix constructed from the T1 and diffusion weighted imaging data of the Human Connectome Project (WU-Minn HCP Data - 1200 Subjects release)	macro
connectome_human_vandenheuvel103818	82	1198	Van Den Heuvel (2015)	link	Tractography-based connectivity matrix constructed from the T1 and diffusion weighted imaging data of the Human Connectome Project (WU-Minn HCP Data - 1200 Subjects release)	macro
connectome_human_vandenheuvel104820	82	1242	Van Den Heuvel (2015)	link	Tractography-based connectivity matrix constructed from the T1 and diffusion weighted imaging data of the Human Connectome Project (WU-Minn HCP Data - 1200 Subjects release)	macro
connectome_human_vandenheuvel105014	82	1055	Van Den Heuvel (2015)	link	Tractography-based connectivity matrix constructed from the T1 and diffusion weighted imaging data of the Human Connectome Project (WU-Minn HCP Data - 1200 Subjects release)	macro
connectome_human_vandenheuvel105115	82	1127	Van Den Heuvel (2015)	link	Tractography-based connectivity matrix constructed from the T1 and diffusion weighted imaging data of the Human Connectome Project (WU-Minn HCP Data - 1200 Subjects release)	macro
connectome_human_vandenheuvel105216	82	1199	Van Den Heuvel (2015)	link	Tractography-based connectivity matrix constructed from the T1 and diffusion weighted imaging data of the Human Connectome Project (WU-Minn HCP Data - 1200 Subjects release)	macro
connectome_human_vandenheuvel106016	82	1140	Van Den Heuvel (2015)	link	Tractography-based connectivity matrix constructed from the T1 and diffusion weighted imaging data of the Human Connectome Project (WU-Minn HCP Data - 1200 Subjects release)	macro
connectome_human_vandenheuvel106319	82	1136	Van Den Heuvel (2015)	link	Tractography-based connectivity matrix constructed from the T1 and diffusion weighted imaging data of the Human Connectome Project (WU-Minn HCP Data - 1200 Subjects release)	macro
connectome_human_vandenheuvel106521	82	1153	Van Den Heuvel (2015)	link	Tractography-based connectivity matrix constructed from the T1 and diffusion weighted imaging data of the Human Connectome Project (WU-Minn HCP Data - 1200 Subjects release)	macro
connectome_human_vandenheuvel107321	82	1080	Van Den Heuvel (2015)	link	Tractography-based connectivity matrix constructed from the T1 and diffusion weighted imaging data of the Human Connectome Project (WU-Minn HCP Data - 1200 Subjects release)	macro
connectome_human_vandenheuvel107422	82	1193	Van Den Heuvel (2015)	link	Tractography-based connectivity matrix constructed from the T1 and diffusion weighted imaging data of the Human Connectome Project (WU-Minn HCP Data - 1200 Subjects release)	macro
connectome_human_vandenheuvel108121	82	1162	Van Den Heuvel (2015)	link	Tractography-based connectivity matrix constructed from the T1 and diffusion weighted imaging data of the Human Connectome Project (WU-Minn HCP Data - 1200 Subjects release)	macro
connectome_human_vandenheuvel108323	82	1248	Van Den Heuvel (2015)	link	Tractography-based connectivity matrix constructed from the T1 and diffusion weighted imaging data of the Human Connectome Project (WU-Minn HCP Data - 1200 Subjects release)	macro
connectome_human_vandenheuvel108525	82	1184	Van Den Heuvel (2015)	link	Tractography-based connectivity matrix constructed from the T1 and diffusion weighted imaging data of the Human Connectome Project (WU-Minn HCP Data - 1200 Subjects release)	macro
connectome_human_vandenheuvel108828	82	1063	Van Den Heuvel (2015)	link	Tractography-based connectivity matrix constructed from the T1 and diffusion weighted imaging data of the Human Connectome Project (WU-Minn HCP Data - 1200 Subjects release)	macro
connectome_human_vandenheuvel109123	82	1173	Van Den Heuvel (2015)	link	Tractography-based connectivity matrix constructed from the T1 and diffusion weighted imaging data of the Human Connectome Project (WU-Minn HCP Data - 1200 Subjects release)	macro
connectome_human_vandenheuvel110411	82	1203	Van Den Heuvel (2015)	link	Tractography-based connectivity matrix constructed from the T1 and diffusion weighted imaging data of the Human Connectome Project (WU-Minn HCP Data - 1200 Subjects release)	macro
connectome_human_vandenheuvel111312	82	1070	Van Den Heuvel (2015)	link	Tractography-based connectivity matrix constructed from the T1 and diffusion weighted imaging data of the Human Connectome Project (WU-Minn HCP Data - 1200 Subjects release)	macro
connectome_human_vandenheuvel111413	82	1180	Van Den Heuvel (2015)	link	Tractography-based connectivity matrix constructed from the T1 and diffusion weighted imaging data of the Human Connectome Project (WU-Minn HCP Data - 1200 Subjects release)	macro
connectome_human_vandenheuvel111716	82	1010	Van Den Heuvel (2015)	link	Tractography-based connectivity matrix constructed from the T1 and diffusion weighted imaging data of the Human Connectome Project (WU-Minn HCP Data - 1200 Subjects release)	macro
connectome_human_vandenheuvel112819	82	1183	Van Den Heuvel (2015)	link	Tractography-based connectivity matrix constructed from the T1 and diffusion weighted imaging data of the Human Connectome Project (WU-Minn HCP Data - 1200 Subjects release)	macro
connectome_human_vandenheuvel113215	82	1206	Van Den Heuvel (2015)	link	Tractography-based connectivity matrix constructed from the T1 and diffusion weighted imaging data of the Human Connectome Project (WU-Minn HCP Data - 1200 Subjects release)	macro
connectome_human_vandenheuvel113619	82	1242	Van Den Heuvel (2015)	link	Tractography-based connectivity matrix constructed from the T1 and diffusion weighted imaging data of the Human Connectome Project (WU-Minn HCP Data - 1200 Subjects release)	macro
connectome_human_vandenheuvel113821	82	1062	Van Den Heuvel (2015)	link	Tractography-based connectivity matrix constructed from the T1 and diffusion weighted imaging data of the Human Connectome Project (WU-Minn HCP Data - 1200 Subjects release)	macro
connectome_human_vandenheuvel113922	82	1283	Van Den Heuvel (2015)	link	Tractography-based connectivity matrix constructed from the T1 and diffusion weighted imaging data of the Human Connectome Project (WU-Minn HCP Data - 1200 Subjects release)	macro
connectome_human_vandenheuvel114419	82	1215	Van Den Heuvel (2015)	link	Tractography-based connectivity matrix constructed from the T1 and diffusion weighted imaging data of the Human Connectome Project (WU-Minn HCP Data - 1200 Subjects release)	macro
connectome_human_vandenheuvel115320	82	1290	Van Den Heuvel (2015)	link	Tractography-based connectivity matrix constructed from the T1 and diffusion weighted imaging data of the Human Connectome Project (WU-Minn HCP Data - 1200 Subjects release)	macro
connectome_human_vandenheuvel116524	82	1066	Van Den Heuvel (2015)	link	Tractography-based connectivity matrix constructed from the T1 and diffusion weighted imaging data of the Human Connectome Project (WU-Minn HCP Data - 1200 Subjects release)	macro
connectome_human_vandenheuvel117122	82	1233	Van Den Heuvel (2015)	link	Tractography-based connectivity matrix constructed from the T1 and diffusion weighted imaging data of the Human Connectome Project (WU-Minn HCP Data - 1200 Subjects release)	macro
connectome_human_vandenheuvel117324	82	1236	Van Den Heuvel (2015)	link	Tractography-based connectivity matrix constructed from the T1 and diffusion weighted imaging data of the Human Connectome Project (WU-Minn HCP Data - 1200 Subjects release)	macro
connectome_human_vandenheuvel118528	82	1092	Van Den Heuvel (2015)	link	Tractography-based connectivity matrix constructed from the T1 and diffusion weighted imaging data of the Human Connectome Project (WU-Minn HCP Data - 1200 Subjects release)	macro
connectome_human_vandenheuvel118730	82	1168	Van Den Heuvel (2015)	link	Tractography-based connectivity matrix constructed from the T1 and diffusion weighted imaging data of the Human Connectome Project (WU-Minn HCP Data - 1200 Subjects release)	macro
connectome_human_vandenheuvel118932	82	1299	Van Den Heuvel (2015)	link	Tractography-based connectivity matrix constructed from the T1 and diffusion weighted imaging data of the Human Connectome Project (WU-Minn HCP Data - 1200 Subjects release)	macro
connectome_human_vandenheuvel119833	82	1228	Van Den Heuvel (2015)	link	Tractography-based connectivity matrix constructed from the T1 and diffusion weighted imaging data of the Human Connectome Project (WU-Minn HCP Data - 1200 Subjects release)	macro
connectome_human_vandenheuvel120111	82	1120	Van Den Heuvel (2015)	link	Tractography-based connectivity matrix constructed from the T1 and diffusion weighted imaging data of the Human Connectome Project (WU-Minn HCP Data - 1200 Subjects release)	macro
connectome_human_vandenheuvel120212	82	1158	Van Den Heuvel (2015)	link	Tractography-based connectivity matrix constructed from the T1 and diffusion weighted imaging data of the Human Connectome Project (WU-Minn HCP Data - 1200 Subjects release)	macro
connectome_human_vandenheuvel120515	82	1237	Van Den Heuvel (2015)	link	Tractography-based connectivity matrix constructed from the T1 and diffusion weighted imaging data of the Human Connectome Project (WU-Minn HCP Data - 1200 Subjects release)	macro
connectome_human_vandenheuvel121618	82	1062	Van Den Heuvel (2015)	link	Tractography-based connectivity matrix constructed from the T1 and diffusion weighted imaging data of the Human Connectome Project (WU-Minn HCP Data - 1200 Subjects release)	macro
connectome_human_vandenheuvel122317	82	1236	Van Den Heuvel (2015)	link	Tractography-based connectivity matrix constructed from the T1 and diffusion weighted imaging data of the Human Connectome Project (WU-Minn HCP Data - 1200 Subjects release)	macro
connectome_human_vandenheuvel122620	82	1136	Van Den Heuvel (2015)	link	Tractography-based connectivity matrix constructed from the T1 and diffusion weighted imaging data of the Human Connectome Project (WU-Minn HCP Data - 1200 Subjects release)	macro
connectome_human_vandenheuvel123117	82	1304	Van Den Heuvel (2015)	link	Tractography-based connectivity matrix constructed from the T1 and diffusion weighted imaging data of the Human Connectome Project (WU-Minn HCP Data - 1200 Subjects release)	macro
connectome_human_vandenheuvel123420	82	1067	Van Den Heuvel (2015)	link	Tractography-based connectivity matrix constructed from the T1 and diffusion weighted imaging data of the Human Connectome Project (WU-Minn HCP Data - 1200 Subjects release)	macro
connectome_human_vandenheuvel123925	82	1091	Van Den Heuvel (2015)	link	Tractography-based connectivity matrix constructed from the T1 and diffusion weighted imaging data of the Human Connectome Project (WU-Minn HCP Data - 1200 Subjects release)	macro
connectome_human_vandenheuvel124220	82	1197	Van Den Heuvel (2015)	link	Tractography-based connectivity matrix constructed from the T1 and diffusion weighted imaging data of the Human Connectome Project (WU-Minn HCP Data - 1200 Subjects release)	macro
connectome_human_vandenheuvel124422	82	1346	Van Den Heuvel (2015)	link	Tractography-based connectivity matrix constructed from the T1 and diffusion weighted imaging data of the Human Connectome Project (WU-Minn HCP Data - 1200 Subjects release)	macro
connectome_human_vandenheuvel124826	82	1164	Van Den Heuvel (2015)	link	Tractography-based connectivity matrix constructed from the T1 and diffusion weighted imaging data of the Human Connectome Project (WU-Minn HCP Data - 1200 Subjects release)	macro
connectome_human_vandenheuvel125525	82	1105	Van Den Heuvel (2015)	link	Tractography-based connectivity matrix constructed from the T1 and diffusion weighted imaging data of the Human Connectome Project (WU-Minn HCP Data - 1200 Subjects release)	macro
connectome_human_vandenheuvel126325	82	1236	Van Den Heuvel (2015)	link	Tractography-based connectivity matrix constructed from the T1 and diffusion weighted imaging data of the Human Connectome Project (WU-Minn HCP Data - 1200 Subjects release)	macro
connectome_human_vandenheuvel126628	82	1264	Van Den Heuvel (2015)	link	Tractography-based connectivity matrix constructed from the T1 and diffusion weighted imaging data of the Human Connectome Project (WU-Minn HCP Data - 1200 Subjects release)	macro
connectome_human_vandenheuvel127630	82	1200	Van Den Heuvel (2015)	link	Tractography-based connectivity matrix constructed from the T1 and diffusion weighted imaging data of the Human Connectome Project (WU-Minn HCP Data - 1200 Subjects release)	macro
connectome_human_vandenheuvel127933	82	1120	Van Den Heuvel (2015)	link	Tractography-based connectivity matrix constructed from the T1 and diffusion weighted imaging data of the Human Connectome Project (WU-Minn HCP Data - 1200 Subjects release)	macro
connectome_human_vandenheuvel128127	82	1268	Van Den Heuvel (2015)	link	Tractography-based connectivity matrix constructed from the T1 and diffusion weighted imaging data of the Human Connectome Project (WU-Minn HCP Data - 1200 Subjects release)	macro
connectome_human_vandenheuvel128632	82	1183	Van Den Heuvel (2015)	link	Tractography-based connectivity matrix constructed from the T1 and diffusion weighted imaging data of the Human Connectome Project (WU-Minn HCP Data - 1200 Subjects release)	macro
connectome_human_vandenheuvel129028	82	1250	Van Den Heuvel (2015)	link	Tractography-based connectivity matrix constructed from the T1 and diffusion weighted imaging data of the Human Connectome Project (WU-Minn HCP Data - 1200 Subjects release)	macro
connectome_human_vandenheuvel130013	82	1280	Van Den Heuvel (2015)	link	Tractography-based connectivity matrix constructed from the T1 and diffusion weighted imaging data of the Human Connectome Project (WU-Minn HCP Data - 1200 Subjects release)	macro
connectome_human_vandenheuvel130316	82	1195	Van Den Heuvel (2015)	link	Tractography-based connectivity matrix constructed from the T1 and diffusion weighted imaging data of the Human Connectome Project (WU-Minn HCP Data - 1200 Subjects release)	macro
connectome_human_vandenheuvel130922	82	1177	Van Den Heuvel (2015)	link	Tractography-based connectivity matrix constructed from the T1 and diffusion weighted imaging data of the Human Connectome Project (WU-Minn HCP Data - 1200 Subjects release)	macro
connectome_human_vandenheuvel131217	82	1182	Van Den Heuvel (2015)	link	Tractography-based connectivity matrix constructed from the T1 and diffusion weighted imaging data of the Human Connectome Project (WU-Minn HCP Data - 1200 Subjects release)	macro
connectome_human_vandenheuvel131722	82	1150	Van Den Heuvel (2015)	link	Tractography-based connectivity matrix constructed from the T1 and diffusion weighted imaging data of the Human Connectome Project (WU-Minn HCP Data - 1200 Subjects release)	macro
connectome_human_vandenheuvel131924	82	1198	Van Den Heuvel (2015)	link	Tractography-based connectivity matrix constructed from the T1 and diffusion weighted imaging data of the Human Connectome Project (WU-Minn HCP Data - 1200 Subjects release)	macro
connectome_human_vandenheuvel132118	82	1265	Van Den Heuvel (2015)	link	Tractography-based connectivity matrix constructed from the T1 and diffusion weighted imaging data of the Human Connectome Project (WU-Minn HCP Data - 1200 Subjects release)	macro
connectome_human_vandenheuvel133019	82	1196	Van Den Heuvel (2015)	link	Tractography-based connectivity matrix constructed from the T1 and diffusion weighted imaging data of the Human Connectome Project (WU-Minn HCP Data - 1200 Subjects release)	macro
connectome_human_vandenheuvel133625	82	1118	Van Den Heuvel (2015)	link	Tractography-based connectivity matrix constructed from the T1 and diffusion weighted imaging data of the Human Connectome Project (WU-Minn HCP Data - 1200 Subjects release)	macro
connectome_human_vandenheuvel133827	82	1229	Van Den Heuvel (2015)	link	Tractography-based connectivity matrix constructed from the T1 and diffusion weighted imaging data of the Human Connectome Project (WU-Minn HCP Data - 1200 Subjects release)	macro
connectome_human_vandenheuvel133928	82	1292	Van Den Heuvel (2015)	link	Tractography-based connectivity matrix constructed from the T1 and diffusion weighted imaging data of the Human Connectome Project (WU-Minn HCP Data - 1200 Subjects release)	macro
connectome_human_vandenheuvel134324	82	1179	Van Den Heuvel (2015)	link	Tractography-based connectivity matrix constructed from the T1 and diffusion weighted imaging data of the Human Connectome Project (WU-Minn HCP Data - 1200 Subjects release)	macro
connectome_human_vandenheuvel135225	82	1211	Van Den Heuvel (2015)	link	Tractography-based connectivity matrix constructed from the T1 and diffusion weighted imaging data of the Human Connectome Project (WU-Minn HCP Data - 1200 Subjects release)	macro
connectome_human_vandenheuvel135528	82	1115	Van Den Heuvel (2015)	link	Tractography-based connectivity matrix constructed from the T1 and diffusion weighted imaging data of the Human Connectome Project (WU-Minn HCP Data - 1200 Subjects release)	macro
connectome_human_vandenheuvel135932	82	1169	Van Den Heuvel (2015)	link	Tractography-based connectivity matrix constructed from the T1 and diffusion weighted imaging data of the Human Connectome Project (WU-Minn HCP Data - 1200 Subjects release)	macro
connectome_human_vandenheuvel136227	82	1180	Van Den Heuvel (2015)	link	Tractography-based connectivity matrix constructed from the T1 and diffusion weighted imaging data of the Human Connectome Project (WU-Minn HCP Data - 1200 Subjects release)	macro
connectome_human_vandenheuvel136833	82	1115	Van Den Heuvel (2015)	link	Tractography-based connectivity matrix constructed from the T1 and diffusion weighted imaging data of the Human Connectome Project (WU-Minn HCP Data - 1200 Subjects release)	macro
connectome_human_vandenheuvel137027	82	1175	Van Den Heuvel (2015)	link	Tractography-based connectivity matrix constructed from the T1 and diffusion weighted imaging data of the Human Connectome Project (WU-Minn HCP Data - 1200 Subjects release)	macro
connectome_human_vandenheuvel137128	82	1078	Van Den Heuvel (2015)	link	Tractography-based connectivity matrix constructed from the T1 and diffusion weighted imaging data of the Human Connectome Project (WU-Minn HCP Data - 1200 Subjects release)	macro
connectome_human_vandenheuvel137633	82	1154	Van Den Heuvel (2015)	link	Tractography-based connectivity matrix constructed from the T1 and diffusion weighted imaging data of the Human Connectome Project (WU-Minn HCP Data - 1200 Subjects release)	macro
connectome_human_vandenheuvel137936	82	1067	Van Den Heuvel (2015)	link	Tractography-based connectivity matrix constructed from the T1 and diffusion weighted imaging data of the Human Connectome Project (WU-Minn HCP Data - 1200 Subjects release)	macro
connectome_human_vandenheuvel138231	82	1204	Van Den Heuvel (2015)	link	Tractography-based connectivity matrix constructed from the T1 and diffusion weighted imaging data of the Human Connectome Project (WU-Minn HCP Data - 1200 Subjects release)	macro
connectome_human_vandenheuvel138534	82	1195	Van Den Heuvel (2015)	link	Tractography-based connectivity matrix constructed from the T1 and diffusion weighted imaging data of the Human Connectome Project (WU-Minn HCP Data - 1200 Subjects release)	macro
connectome_human_vandenheuvel139233	82	989	Van Den Heuvel (2015)	link	Tractography-based connectivity matrix constructed from the T1 and diffusion weighted imaging data of the Human Connectome Project (WU-Minn HCP Data - 1200 Subjects release)	macro
connectome_human_vandenheuvel139637	82	1137	Van Den Heuvel (2015)	link	Tractography-based connectivity matrix constructed from the T1 and diffusion weighted imaging data of the Human Connectome Project (WU-Minn HCP Data - 1200 Subjects release)	macro
connectome_human_vandenheuvel140117	82	1200	Van Den Heuvel (2015)	link	Tractography-based connectivity matrix constructed from the T1 and diffusion weighted imaging data of the Human Connectome Project (WU-Minn HCP Data - 1200 Subjects release)	macro
connectome_human_vandenheuvel140420	82	1127	Van Den Heuvel (2015)	link	Tractography-based connectivity matrix constructed from the T1 and diffusion weighted imaging data of the Human Connectome Project (WU-Minn HCP Data - 1200 Subjects release)	macro
connectome_human_vandenheuvel140824	82	1108	Van Den Heuvel (2015)	link	Tractography-based connectivity matrix constructed from the T1 and diffusion weighted imaging data of the Human Connectome Project (WU-Minn HCP Data - 1200 Subjects release)	macro
connectome_human_vandenheuvel140925	82	1101	Van Den Heuvel (2015)	link	Tractography-based connectivity matrix constructed from the T1 and diffusion weighted imaging data of the Human Connectome Project (WU-Minn HCP Data - 1200 Subjects release)	macro
connectome_human_vandenheuvel141422	82	1076	Van Den Heuvel (2015)	link	Tractography-based connectivity matrix constructed from the T1 and diffusion weighted imaging data of the Human Connectome Project (WU-Minn HCP Data - 1200 Subjects release)	macro
connectome_human_vandenheuvel141826	82	1238	Van Den Heuvel (2015)	link	Tractography-based connectivity matrix constructed from the T1 and diffusion weighted imaging data of the Human Connectome Project (WU-Minn HCP Data - 1200 Subjects release)	macro
connectome_human_vandenheuvel142828	82	1252	Van Den Heuvel (2015)	link	Tractography-based connectivity matrix constructed from the T1 and diffusion weighted imaging data of the Human Connectome Project (WU-Minn HCP Data - 1200 Subjects release)	macro
connectome_human_vandenheuvel143325	82	1096	Van Den Heuvel (2015)	link	Tractography-based connectivity matrix constructed from the T1 and diffusion weighted imaging data of the Human Connectome Project (WU-Minn HCP Data - 1200 Subjects release)	macro
connectome_human_vandenheuvel144226	82	1110	Van Den Heuvel (2015)	link	Tractography-based connectivity matrix constructed from the T1 and diffusion weighted imaging data of the Human Connectome Project (WU-Minn HCP Data - 1200 Subjects release)	macro
connectome_human_vandenheuvel144832	82	1108	Van Den Heuvel (2015)	link	Tractography-based connectivity matrix constructed from the T1 and diffusion weighted imaging data of the Human Connectome Project (WU-Minn HCP Data - 1200 Subjects release)	macro
connectome_human_vandenheuvel145834	82	1095	Van Den Heuvel (2015)	link	Tractography-based connectivity matrix constructed from the T1 and diffusion weighted imaging data of the Human Connectome Project (WU-Minn HCP Data - 1200 Subjects release)	macro
connectome_human_vandenheuvel146331	82	986	Van Den Heuvel (2015)	link	Tractography-based connectivity matrix constructed from the T1 and diffusion weighted imaging data of the Human Connectome Project (WU-Minn HCP Data - 1200 Subjects release)	macro
connectome_human_vandenheuvel146432	82	1176	Van Den Heuvel (2015)	link	Tractography-based connectivity matrix constructed from the T1 and diffusion weighted imaging data of the Human Connectome Project (WU-Minn HCP Data - 1200 Subjects release)	macro
connectome_human_vandenheuvel147030	82	1212	Van Den Heuvel (2015)	link	Tractography-based connectivity matrix constructed from the T1 and diffusion weighted imaging data of the Human Connectome Project (WU-Minn HCP Data - 1200 Subjects release)	macro
connectome_human_vandenheuvel147737	82	1077	Van Den Heuvel (2015)	link	Tractography-based connectivity matrix constructed from the T1 and diffusion weighted imaging data of the Human Connectome Project (WU-Minn HCP Data - 1200 Subjects release)	macro
connectome_human_vandenheuvel148032	82	1149	Van Den Heuvel (2015)	link	Tractography-based connectivity matrix constructed from the T1 and diffusion weighted imaging data of the Human Connectome Project (WU-Minn HCP Data - 1200 Subjects release)	macro
connectome_human_vandenheuvel148335	82	1229	Van Den Heuvel (2015)	link	Tractography-based connectivity matrix constructed from the T1 and diffusion weighted imaging data of the Human Connectome Project (WU-Minn HCP Data - 1200 Subjects release)	macro
connectome_human_vandenheuvel148840	82	1082	Van Den Heuvel (2015)	link	Tractography-based connectivity matrix constructed from the T1 and diffusion weighted imaging data of the Human Connectome Project (WU-Minn HCP Data - 1200 Subjects release)	macro
connectome_human_vandenheuvel148941	82	1203	Van Den Heuvel (2015)	link	Tractography-based connectivity matrix constructed from the T1 and diffusion weighted imaging data of the Human Connectome Project (WU-Minn HCP Data - 1200 Subjects release)	macro
connectome_human_vandenheuvel149337	82	1163	Van Den Heuvel (2015)	link	Tractography-based connectivity matrix constructed from the T1 and diffusion weighted imaging data of the Human Connectome Project (WU-Minn HCP Data - 1200 Subjects release)	macro
connectome_human_vandenheuvel149539	82	1232	Van Den Heuvel (2015)	link	Tractography-based connectivity matrix constructed from the T1 and diffusion weighted imaging data of the Human Connectome Project (WU-Minn HCP Data - 1200 Subjects release)	macro
connectome_human_vandenheuvel149741	82	1223	Van Den Heuvel (2015)	link	Tractography-based connectivity matrix constructed from the T1 and diffusion weighted imaging data of the Human Connectome Project (WU-Minn HCP Data - 1200 Subjects release)	macro
connectome_human_vandenheuvel150423	82	1122	Van Den Heuvel (2015)	link	Tractography-based connectivity matrix constructed from the T1 and diffusion weighted imaging data of the Human Connectome Project (WU-Minn HCP Data - 1200 Subjects release)	macro
connectome_human_vandenheuvel150524	82	1137	Van Den Heuvel (2015)	link	Tractography-based connectivity matrix constructed from the T1 and diffusion weighted imaging data of the Human Connectome Project (WU-Minn HCP Data - 1200 Subjects release)	macro
connectome_human_vandenheuvel150625	82	1174	Van Den Heuvel (2015)	link	Tractography-based connectivity matrix constructed from the T1 and diffusion weighted imaging data of the Human Connectome Project (WU-Minn HCP Data - 1200 Subjects release)	macro
connectome_human_vandenheuvel150726	82	1172	Van Den Heuvel (2015)	link	Tractography-based connectivity matrix constructed from the T1 and diffusion weighted imaging data of the Human Connectome Project (WU-Minn HCP Data - 1200 Subjects release)	macro
connectome_human_vandenheuvel151223	82	1115	Van Den Heuvel (2015)	link	Tractography-based connectivity matrix constructed from the T1 and diffusion weighted imaging data of the Human Connectome Project (WU-Minn HCP Data - 1200 Subjects release)	macro
connectome_human_vandenheuvel151526	82	1251	Van Den Heuvel (2015)	link	Tractography-based connectivity matrix constructed from the T1 and diffusion weighted imaging data of the Human Connectome Project (WU-Minn HCP Data - 1200 Subjects release)	macro
connectome_human_vandenheuvel151627	82	1232	Van Den Heuvel (2015)	link	Tractography-based connectivity matrix constructed from the T1 and diffusion weighted imaging data of the Human Connectome Project (WU-Minn HCP Data - 1200 Subjects release)	macro
connectome_human_vandenheuvel151728	82	1128	Van Den Heuvel (2015)	link	Tractography-based connectivity matrix constructed from the T1 and diffusion weighted imaging data of the Human Connectome Project (WU-Minn HCP Data - 1200 Subjects release)	macro
connectome_human_vandenheuvel152831	82	1221	Van Den Heuvel (2015)	link	Tractography-based connectivity matrix constructed from the T1 and diffusion weighted imaging data of the Human Connectome Project (WU-Minn HCP Data - 1200 Subjects release)	macro
connectome_human_vandenheuvel153025	82	1161	Van Den Heuvel (2015)	link	Tractography-based connectivity matrix constructed from the T1 and diffusion weighted imaging data of the Human Connectome Project (WU-Minn HCP Data - 1200 Subjects release)	macro
connectome_human_vandenheuvel153429	82	1165	Van Den Heuvel (2015)	link	Tractography-based connectivity matrix constructed from the T1 and diffusion weighted imaging data of the Human Connectome Project (WU-Minn HCP Data - 1200 Subjects release)	macro
connectome_human_vandenheuvel153833	82	1040	Van Den Heuvel (2015)	link	Tractography-based connectivity matrix constructed from the T1 and diffusion weighted imaging data of the Human Connectome Project (WU-Minn HCP Data - 1200 Subjects release)	macro
connectome_human_vandenheuvel154431	82	1160	Van Den Heuvel (2015)	link	Tractography-based connectivity matrix constructed from the T1 and diffusion weighted imaging data of the Human Connectome Project (WU-Minn HCP Data - 1200 Subjects release)	macro
connectome_human_vandenheuvel154734	82	1177	Van Den Heuvel (2015)	link	Tractography-based connectivity matrix constructed from the T1 and diffusion weighted imaging data of the Human Connectome Project (WU-Minn HCP Data - 1200 Subjects release)	macro
connectome_human_vandenheuvel154835	82	1367	Van Den Heuvel (2015)	link	Tractography-based connectivity matrix constructed from the T1 and diffusion weighted imaging data of the Human Connectome Project (WU-Minn HCP Data - 1200 Subjects release)	macro
connectome_human_vandenheuvel154936	82	1144	Van Den Heuvel (2015)	link	Tractography-based connectivity matrix constructed from the T1 and diffusion weighted imaging data of the Human Connectome Project (WU-Minn HCP Data - 1200 Subjects release)	macro
connectome_human_vandenheuvel155231	82	1195	Van Den Heuvel (2015)	link	Tractography-based connectivity matrix constructed from the T1 and diffusion weighted imaging data of the Human Connectome Project (WU-Minn HCP Data - 1200 Subjects release)	macro
connectome_human_vandenheuvel155635	82	1240	Van Den Heuvel (2015)	link	Tractography-based connectivity matrix constructed from the T1 and diffusion weighted imaging data of the Human Connectome Project (WU-Minn HCP Data - 1200 Subjects release)	macro
connectome_human_vandenheuvel156233	82	1180	Van Den Heuvel (2015)	link	Tractography-based connectivity matrix constructed from the T1 and diffusion weighted imaging data of the Human Connectome Project (WU-Minn HCP Data - 1200 Subjects release)	macro
connectome_human_vandenheuvel156637	82	1258	Van Den Heuvel (2015)	link	Tractography-based connectivity matrix constructed from the T1 and diffusion weighted imaging data of the Human Connectome Project (WU-Minn HCP Data - 1200 Subjects release)	macro
connectome_human_vandenheuvel157336	82	1196	Van Den Heuvel (2015)	link	Tractography-based connectivity matrix constructed from the T1 and diffusion weighted imaging data of the Human Connectome Project (WU-Minn HCP Data - 1200 Subjects release)	macro
connectome_human_vandenheuvel157437	82	1199	Van Den Heuvel (2015)	link	Tractography-based connectivity matrix constructed from the T1 and diffusion weighted imaging data of the Human Connectome Project (WU-Minn HCP Data - 1200 Subjects release)	macro
connectome_human_vandenheuvel158035	82	1185	Van Den Heuvel (2015)	link	Tractography-based connectivity matrix constructed from the T1 and diffusion weighted imaging data of the Human Connectome Project (WU-Minn HCP Data - 1200 Subjects release)	macro
connectome_human_vandenheuvel158136	82	1165	Van Den Heuvel (2015)	link	Tractography-based connectivity matrix constructed from the T1 and diffusion weighted imaging data of the Human Connectome Project (WU-Minn HCP Data - 1200 Subjects release)	macro
connectome_human_vandenheuvel158540	82	1174	Van Den Heuvel (2015)	link	Tractography-based connectivity matrix constructed from the T1 and diffusion weighted imaging data of the Human Connectome Project (WU-Minn HCP Data - 1200 Subjects release)	macro
connectome_human_vandenheuvel159138	82	1086	Van Den Heuvel (2015)	link	Tractography-based connectivity matrix constructed from the T1 and diffusion weighted imaging data of the Human Connectome Project (WU-Minn HCP Data - 1200 Subjects release)	macro
connectome_human_vandenheuvel159239	82	1155	Van Den Heuvel (2015)	link	Tractography-based connectivity matrix constructed from the T1 and diffusion weighted imaging data of the Human Connectome Project (WU-Minn HCP Data - 1200 Subjects release)	macro
connectome_human_vandenheuvel159340	82	1185	Van Den Heuvel (2015)	link	Tractography-based connectivity matrix constructed from the T1 and diffusion weighted imaging data of the Human Connectome Project (WU-Minn HCP Data - 1200 Subjects release)	macro
connectome_human_vandenheuvel159441	82	1216	Van Den Heuvel (2015)	link	Tractography-based connectivity matrix constructed from the T1 and diffusion weighted imaging data of the Human Connectome Project (WU-Minn HCP Data - 1200 Subjects release)	macro
connectome_human_vandenheuvel160123	82	1263	Van Den Heuvel (2015)	link	Tractography-based connectivity matrix constructed from the T1 and diffusion weighted imaging data of the Human Connectome Project (WU-Minn HCP Data - 1200 Subjects release)	macro
connectome_human_vandenheuvel160830	82	1315	Van Den Heuvel (2015)	link	Tractography-based connectivity matrix constructed from the T1 and diffusion weighted imaging data of the Human Connectome Project (WU-Minn HCP Data - 1200 Subjects release)	macro
connectome_human_vandenheuvel161327	82	1071	Van Den Heuvel (2015)	link	Tractography-based connectivity matrix constructed from the T1 and diffusion weighted imaging data of the Human Connectome Project (WU-Minn HCP Data - 1200 Subjects release)	macro
connectome_human_vandenheuvel161630	82	1087	Van Den Heuvel (2015)	link	Tractography-based connectivity matrix constructed from the T1 and diffusion weighted imaging data of the Human Connectome Project (WU-Minn HCP Data - 1200 Subjects release)	macro
connectome_human_vandenheuvel161731	82	1163	Van Den Heuvel (2015)	link	Tractography-based connectivity matrix constructed from the T1 and diffusion weighted imaging data of the Human Connectome Project (WU-Minn HCP Data - 1200 Subjects release)	macro
connectome_human_vandenheuvel162026	82	1063	Van Den Heuvel (2015)	link	Tractography-based connectivity matrix constructed from the T1 and diffusion weighted imaging data of the Human Connectome Project (WU-Minn HCP Data - 1200 Subjects release)	macro
connectome_human_vandenheuvel162228	82	1107	Van Den Heuvel (2015)	link	Tractography-based connectivity matrix constructed from the T1 and diffusion weighted imaging data of the Human Connectome Project (WU-Minn HCP Data - 1200 Subjects release)	macro
connectome_human_vandenheuvel162329	82	1171	Van Den Heuvel (2015)	link	Tractography-based connectivity matrix constructed from the T1 and diffusion weighted imaging data of the Human Connectome Project (WU-Minn HCP Data - 1200 Subjects release)	macro
connectome_human_vandenheuvel162733	82	1203	Van Den Heuvel (2015)	link	Tractography-based connectivity matrix constructed from the T1 and diffusion weighted imaging data of the Human Connectome Project (WU-Minn HCP Data - 1200 Subjects release)	macro
connectome_human_vandenheuvel163129	82	1237	Van Den Heuvel (2015)	link	Tractography-based connectivity matrix constructed from the T1 and diffusion weighted imaging data of the Human Connectome Project (WU-Minn HCP Data - 1200 Subjects release)	macro
connectome_human_vandenheuvel163331	82	1115	Van Den Heuvel (2015)	link	Tractography-based connectivity matrix constructed from the T1 and diffusion weighted imaging data of the Human Connectome Project (WU-Minn HCP Data - 1200 Subjects release)	macro
connectome_human_vandenheuvel163432	82	996	Van Den Heuvel (2015)	link	Tractography-based connectivity matrix constructed from the T1 and diffusion weighted imaging data of the Human Connectome Project (WU-Minn HCP Data - 1200 Subjects release)	macro
connectome_human_vandenheuvel163836	82	1097	Van Den Heuvel (2015)	link	Tractography-based connectivity matrix constructed from the T1 and diffusion weighted imaging data of the Human Connectome Project (WU-Minn HCP Data - 1200 Subjects release)	macro
connectome_human_vandenheuvel164030	82	1059	Van Den Heuvel (2015)	link	Tractography-based connectivity matrix constructed from the T1 and diffusion weighted imaging data of the Human Connectome Project (WU-Minn HCP Data - 1200 Subjects release)	macro
connectome_human_vandenheuvel164131	82	1181	Van Den Heuvel (2015)	link	Tractography-based connectivity matrix constructed from the T1 and diffusion weighted imaging data of the Human Connectome Project (WU-Minn HCP Data - 1200 Subjects release)	macro
connectome_human_vandenheuvel164939	82	1166	Van Den Heuvel (2015)	link	Tractography-based connectivity matrix constructed from the T1 and diffusion weighted imaging data of the Human Connectome Project (WU-Minn HCP Data - 1200 Subjects release)	macro
connectome_human_vandenheuvel165032	82	1091	Van Den Heuvel (2015)	link	Tractography-based connectivity matrix constructed from the T1 and diffusion weighted imaging data of the Human Connectome Project (WU-Minn HCP Data - 1200 Subjects release)	macro
connectome_human_vandenheuvel165840	82	1121	Van Den Heuvel (2015)	link	Tractography-based connectivity matrix constructed from the T1 and diffusion weighted imaging data of the Human Connectome Project (WU-Minn HCP Data - 1200 Subjects release)	macro
connectome_human_vandenheuvel166438	82	1155	Van Den Heuvel (2015)	link	Tractography-based connectivity matrix constructed from the T1 and diffusion weighted imaging data of the Human Connectome Project (WU-Minn HCP Data - 1200 Subjects release)	macro
connectome_human_vandenheuvel167036	82	1149	Van Den Heuvel (2015)	link	Tractography-based connectivity matrix constructed from the T1 and diffusion weighted imaging data of the Human Connectome Project (WU-Minn HCP Data - 1200 Subjects release)	macro
connectome_human_vandenheuvel167743	82	1119	Van Den Heuvel (2015)	link	Tractography-based connectivity matrix constructed from the T1 and diffusion weighted imaging data of the Human Connectome Project (WU-Minn HCP Data - 1200 Subjects release)	macro
connectome_human_vandenheuvel168139	82	1197	Van Den Heuvel (2015)	link	Tractography-based connectivity matrix constructed from the T1 and diffusion weighted imaging data of the Human Connectome Project (WU-Minn HCP Data - 1200 Subjects release)	macro
connectome_human_vandenheuvel168341	82	1073	Van Den Heuvel (2015)	link	Tractography-based connectivity matrix constructed from the T1 and diffusion weighted imaging data of the Human Connectome Project (WU-Minn HCP Data - 1200 Subjects release)	macro
connectome_human_vandenheuvel169343	82	1200	Van Den Heuvel (2015)	link	Tractography-based connectivity matrix constructed from the T1 and diffusion weighted imaging data of the Human Connectome Project (WU-Minn HCP Data - 1200 Subjects release)	macro
connectome_human_vandenheuvel169444	82	1190	Van Den Heuvel (2015)	link	Tractography-based connectivity matrix constructed from the T1 and diffusion weighted imaging data of the Human Connectome Project (WU-Minn HCP Data - 1200 Subjects release)	macro
connectome_human_vandenheuvel170934	82	1337	Van Den Heuvel (2015)	link	Tractography-based connectivity matrix constructed from the T1 and diffusion weighted imaging data of the Human Connectome Project (WU-Minn HCP Data - 1200 Subjects release)	macro
connectome_human_vandenheuvel171431	82	1201	Van Den Heuvel (2015)	link	Tractography-based connectivity matrix constructed from the T1 and diffusion weighted imaging data of the Human Connectome Project (WU-Minn HCP Data - 1200 Subjects release)	macro
connectome_human_vandenheuvel171633	82	1189	Van Den Heuvel (2015)	link	Tractography-based connectivity matrix constructed from the T1 and diffusion weighted imaging data of the Human Connectome Project (WU-Minn HCP Data - 1200 Subjects release)	macro
connectome_human_vandenheuvel172029	82	1154	Van Den Heuvel (2015)	link	Tractography-based connectivity matrix constructed from the T1 and diffusion weighted imaging data of the Human Connectome Project (WU-Minn HCP Data - 1200 Subjects release)	macro
connectome_human_vandenheuvel172130	82	1140	Van Den Heuvel (2015)	link	Tractography-based connectivity matrix constructed from the T1 and diffusion weighted imaging data of the Human Connectome Project (WU-Minn HCP Data - 1200 Subjects release)	macro
connectome_human_vandenheuvel172332	82	1343	Van Den Heuvel (2015)	link	Tractography-based connectivity matrix constructed from the T1 and diffusion weighted imaging data of the Human Connectome Project (WU-Minn HCP Data - 1200 Subjects release)	macro
connectome_human_vandenheuvel172534	82	1130	Van Den Heuvel (2015)	link	Tractography-based connectivity matrix constructed from the T1 and diffusion weighted imaging data of the Human Connectome Project (WU-Minn HCP Data - 1200 Subjects release)	macro
connectome_human_vandenheuvel172938	82	1129	Van Den Heuvel (2015)	link	Tractography-based connectivity matrix constructed from the T1 and diffusion weighted imaging data of the Human Connectome Project (WU-Minn HCP Data - 1200 Subjects release)	macro
connectome_human_vandenheuvel173132	82	709	Van Den Heuvel (2015)	link	Tractography-based connectivity matrix constructed from the T1 and diffusion weighted imaging data of the Human Connectome Project (WU-Minn HCP Data - 1200 Subjects release)	macro
connectome_human_vandenheuvel173334	82	1150	Van Den Heuvel (2015)	link	Tractography-based connectivity matrix constructed from the T1 and diffusion weighted imaging data of the Human Connectome Project (WU-Minn HCP Data - 1200 Subjects release)	macro
connectome_human_vandenheuvel173435	82	1221	Van Den Heuvel (2015)	link	Tractography-based connectivity matrix constructed from the T1 and diffusion weighted imaging data of the Human Connectome Project (WU-Minn HCP Data - 1200 Subjects release)	macro
connectome_human_vandenheuvel173536	82	1102	Van Den Heuvel (2015)	link	Tractography-based connectivity matrix constructed from the T1 and diffusion weighted imaging data of the Human Connectome Project (WU-Minn HCP Data - 1200 Subjects release)	macro
connectome_human_vandenheuvel173940	82	1143	Van Den Heuvel (2015)	link	Tractography-based connectivity matrix constructed from the T1 and diffusion weighted imaging data of the Human Connectome Project (WU-Minn HCP Data - 1200 Subjects release)	macro
connectome_human_vandenheuvel175035	82	1101	Van Den Heuvel (2015)	link	Tractography-based connectivity matrix constructed from the T1 and diffusion weighted imaging data of the Human Connectome Project (WU-Minn HCP Data - 1200 Subjects release)	macro
connectome_human_vandenheuvel175439	82	1209	Van Den Heuvel (2015)	link	Tractography-based connectivity matrix constructed from the T1 and diffusion weighted imaging data of the Human Connectome Project (WU-Minn HCP Data - 1200 Subjects release)	macro
connectome_human_vandenheuvel176542	82	1176	Van Den Heuvel (2015)	link	Tractography-based connectivity matrix constructed from the T1 and diffusion weighted imaging data of the Human Connectome Project (WU-Minn HCP Data - 1200 Subjects release)	macro
connectome_human_vandenheuvel177645	82	1072	Van Den Heuvel (2015)	link	Tractography-based connectivity matrix constructed from the T1 and diffusion weighted imaging data of the Human Connectome Project (WU-Minn HCP Data - 1200 Subjects release)	macro
connectome_human_vandenheuvel177746	82	1233	Van Den Heuvel (2015)	link	Tractography-based connectivity matrix constructed from the T1 and diffusion weighted imaging data of the Human Connectome Project (WU-Minn HCP Data - 1200 Subjects release)	macro
connectome_human_vandenheuvel178142	82	1359	Van Den Heuvel (2015)	link	Tractography-based connectivity matrix constructed from the T1 and diffusion weighted imaging data of the Human Connectome Project (WU-Minn HCP Data - 1200 Subjects release)	macro
connectome_human_vandenheuvel178748	82	1223	Van Den Heuvel (2015)	link	Tractography-based connectivity matrix constructed from the T1 and diffusion weighted imaging data of the Human Connectome Project (WU-Minn HCP Data - 1200 Subjects release)	macro
connectome_human_vandenheuvel178849	82	1196	Van Den Heuvel (2015)	link	Tractography-based connectivity matrix constructed from the T1 and diffusion weighted imaging data of the Human Connectome Project (WU-Minn HCP Data - 1200 Subjects release)	macro
connectome_human_vandenheuvel178950	82	1268	Van Den Heuvel (2015)	link	Tractography-based connectivity matrix constructed from the T1 and diffusion weighted imaging data of the Human Connectome Project (WU-Minn HCP Data - 1200 Subjects release)	macro
connectome_human_vandenheuvel179346	82	1193	Van Den Heuvel (2015)	link	Tractography-based connectivity matrix constructed from the T1 and diffusion weighted imaging data of the Human Connectome Project (WU-Minn HCP Data - 1200 Subjects release)	macro
connectome_human_vandenheuvel180129	82	1182	Van Den Heuvel (2015)	link	Tractography-based connectivity matrix constructed from the T1 and diffusion weighted imaging data of the Human Connectome Project (WU-Minn HCP Data - 1200 Subjects release)	macro
connectome_human_vandenheuvel180432	82	1114	Van Den Heuvel (2015)	link	Tractography-based connectivity matrix constructed from the T1 and diffusion weighted imaging data of the Human Connectome Project (WU-Minn HCP Data - 1200 Subjects release)	macro
connectome_human_vandenheuvel180836	82	1118	Van Den Heuvel (2015)	link	Tractography-based connectivity matrix constructed from the T1 and diffusion weighted imaging data of the Human Connectome Project (WU-Minn HCP Data - 1200 Subjects release)	macro
connectome_human_vandenheuvel180937	82	1118	Van Den Heuvel (2015)	link	Tractography-based connectivity matrix constructed from the T1 and diffusion weighted imaging data of the Human Connectome Project (WU-Minn HCP Data - 1200 Subjects release)	macro
connectome_human_vandenheuvel181131	82	1007	Van Den Heuvel (2015)	link	Tractography-based connectivity matrix constructed from the T1 and diffusion weighted imaging data of the Human Connectome Project (WU-Minn HCP Data - 1200 Subjects release)	macro
connectome_human_vandenheuvel181232	82	1328	Van Den Heuvel (2015)	link	Tractography-based connectivity matrix constructed from the T1 and diffusion weighted imaging data of the Human Connectome Project (WU-Minn HCP Data - 1200 Subjects release)	macro
connectome_human_vandenheuvel182739	82	1115	Van Den Heuvel (2015)	link	Tractography-based connectivity matrix constructed from the T1 and diffusion weighted imaging data of the Human Connectome Project (WU-Minn HCP Data - 1200 Subjects release)	macro
connectome_human_vandenheuvel182840	82	1278	Van Den Heuvel (2015)	link	Tractography-based connectivity matrix constructed from the T1 and diffusion weighted imaging data of the Human Connectome Project (WU-Minn HCP Data - 1200 Subjects release)	macro
connectome_human_vandenheuvel183034	82	1169	Van Den Heuvel (2015)	link	Tractography-based connectivity matrix constructed from the T1 and diffusion weighted imaging data of the Human Connectome Project (WU-Minn HCP Data - 1200 Subjects release)	macro
connectome_human_vandenheuvel185139	82	1234	Van Den Heuvel (2015)	link	Tractography-based connectivity matrix constructed from the T1 and diffusion weighted imaging data of the Human Connectome Project (WU-Minn HCP Data - 1200 Subjects release)	macro
connectome_human_vandenheuvel185442	82	1268	Van Den Heuvel (2015)	link	Tractography-based connectivity matrix constructed from the T1 and diffusion weighted imaging data of the Human Connectome Project (WU-Minn HCP Data - 1200 Subjects release)	macro
connectome_human_vandenheuvel186141	82	1219	Van Den Heuvel (2015)	link	Tractography-based connectivity matrix constructed from the T1 and diffusion weighted imaging data of the Human Connectome Project (WU-Minn HCP Data - 1200 Subjects release)	macro
connectome_human_vandenheuvel187143	82	1060	Van Den Heuvel (2015)	link	Tractography-based connectivity matrix constructed from the T1 and diffusion weighted imaging data of the Human Connectome Project (WU-Minn HCP Data - 1200 Subjects release)	macro
connectome_human_vandenheuvel187547	82	1166	Van Den Heuvel (2015)	link	Tractography-based connectivity matrix constructed from the T1 and diffusion weighted imaging data of the Human Connectome Project (WU-Minn HCP Data - 1200 Subjects release)	macro
connectome_human_vandenheuvel187850	82	1179	Van Den Heuvel (2015)	link	Tractography-based connectivity matrix constructed from the T1 and diffusion weighted imaging data of the Human Connectome Project (WU-Minn HCP Data - 1200 Subjects release)	macro
connectome_human_vandenheuvel188347	82	1301	Van Den Heuvel (2015)	link	Tractography-based connectivity matrix constructed from the T1 and diffusion weighted imaging data of the Human Connectome Project (WU-Minn HCP Data - 1200 Subjects release)	macro
connectome_human_vandenheuvel189349	82	1067	Van Den Heuvel (2015)	link	Tractography-based connectivity matrix constructed from the T1 and diffusion weighted imaging data of the Human Connectome Project (WU-Minn HCP Data - 1200 Subjects release)	macro
connectome_human_vandenheuvel189450	82	1044	Van Den Heuvel (2015)	link	Tractography-based connectivity matrix constructed from the T1 and diffusion weighted imaging data of the Human Connectome Project (WU-Minn HCP Data - 1200 Subjects release)	macro
connectome_human_vandenheuvel190031	82	1145	Van Den Heuvel (2015)	link	Tractography-based connectivity matrix constructed from the T1 and diffusion weighted imaging data of the Human Connectome Project (WU-Minn HCP Data - 1200 Subjects release)	macro
connectome_human_vandenheuvel191033	82	1165	Van Den Heuvel (2015)	link	Tractography-based connectivity matrix constructed from the T1 and diffusion weighted imaging data of the Human Connectome Project (WU-Minn HCP Data - 1200 Subjects release)	macro
connectome_human_vandenheuvel191336	82	1134	Van Den Heuvel (2015)	link	Tractography-based connectivity matrix constructed from the T1 and diffusion weighted imaging data of the Human Connectome Project (WU-Minn HCP Data - 1200 Subjects release)	macro
connectome_human_vandenheuvel191437	82	1220	Van Den Heuvel (2015)	link	Tractography-based connectivity matrix constructed from the T1 and diffusion weighted imaging data of the Human Connectome Project (WU-Minn HCP Data - 1200 Subjects release)	macro
connectome_human_vandenheuvel191841	82	1246	Van Den Heuvel (2015)	link	Tractography-based connectivity matrix constructed from the T1 and diffusion weighted imaging data of the Human Connectome Project (WU-Minn HCP Data - 1200 Subjects release)	macro
connectome_human_vandenheuvel192439	82	1213	Van Den Heuvel (2015)	link	Tractography-based connectivity matrix constructed from the T1 and diffusion weighted imaging data of the Human Connectome Project (WU-Minn HCP Data - 1200 Subjects release)	macro
connectome_human_vandenheuvel192540	82	1127	Van Den Heuvel (2015)	link	Tractography-based connectivity matrix constructed from the T1 and diffusion weighted imaging data of the Human Connectome Project (WU-Minn HCP Data - 1200 Subjects release)	macro
connectome_human_vandenheuvel192843	82	1160	Van Den Heuvel (2015)	link	Tractography-based connectivity matrix constructed from the T1 and diffusion weighted imaging data of the Human Connectome Project (WU-Minn HCP Data - 1200 Subjects release)	macro
connectome_human_vandenheuvel193239	82	1263	Van Den Heuvel (2015)	link	Tractography-based connectivity matrix constructed from the T1 and diffusion weighted imaging data of the Human Connectome Project (WU-Minn HCP Data - 1200 Subjects release)	macro
connectome_human_vandenheuvel194140	82	1301	Van Den Heuvel (2015)	link	Tractography-based connectivity matrix constructed from the T1 and diffusion weighted imaging data of the Human Connectome Project (WU-Minn HCP Data - 1200 Subjects release)	macro
connectome_human_vandenheuvel194645	82	1133	Van Den Heuvel (2015)	link	Tractography-based connectivity matrix constructed from the T1 and diffusion weighted imaging data of the Human Connectome Project (WU-Minn HCP Data - 1200 Subjects release)	macro
connectome_human_vandenheuvel194847	82	1135	Van Den Heuvel (2015)	link	Tractography-based connectivity matrix constructed from the T1 and diffusion weighted imaging data of the Human Connectome Project (WU-Minn HCP Data - 1200 Subjects release)	macro
connectome_human_vandenheuvel195041	82	1155	Van Den Heuvel (2015)	link	Tractography-based connectivity matrix constructed from the T1 and diffusion weighted imaging data of the Human Connectome Project (WU-Minn HCP Data - 1200 Subjects release)	macro
connectome_human_vandenheuvel195647	82	1248	Van Den Heuvel (2015)	link	Tractography-based connectivity matrix constructed from the T1 and diffusion weighted imaging data of the Human Connectome Project (WU-Minn HCP Data - 1200 Subjects release)	macro
connectome_human_vandenheuvel195849	82	1272	Van Den Heuvel (2015)	link	Tractography-based connectivity matrix constructed from the T1 and diffusion weighted imaging data of the Human Connectome Project (WU-Minn HCP Data - 1200 Subjects release)	macro
connectome_human_vandenheuvel196144	82	1100	Van Den Heuvel (2015)	link	Tractography-based connectivity matrix constructed from the T1 and diffusion weighted imaging data of the Human Connectome Project (WU-Minn HCP Data - 1200 Subjects release)	macro
connectome_human_vandenheuvel196750	82	1099	Van Den Heuvel (2015)	link	Tractography-based connectivity matrix constructed from the T1 and diffusion weighted imaging data of the Human Connectome Project (WU-Minn HCP Data - 1200 Subjects release)	macro
connectome_human_vandenheuvel197348	82	1112	Van Den Heuvel (2015)	link	Tractography-based connectivity matrix constructed from the T1 and diffusion weighted imaging data of the Human Connectome Project (WU-Minn HCP Data - 1200 Subjects release)	macro
connectome_human_vandenheuvel197550	82	1197	Van Den Heuvel (2015)	link	Tractography-based connectivity matrix constructed from the T1 and diffusion weighted imaging data of the Human Connectome Project (WU-Minn HCP Data - 1200 Subjects release)	macro
connectome_human_vandenheuvel197651	82	1016	Van Den Heuvel (2015)	link	Tractography-based connectivity matrix constructed from the T1 and diffusion weighted imaging data of the Human Connectome Project (WU-Minn HCP Data - 1200 Subjects release)	macro
connectome_human_vandenheuvel198350	82	1106	Van Den Heuvel (2015)	link	Tractography-based connectivity matrix constructed from the T1 and diffusion weighted imaging data of the Human Connectome Project (WU-Minn HCP Data - 1200 Subjects release)	macro
connectome_human_vandenheuvel198451	82	1071	Van Den Heuvel (2015)	link	Tractography-based connectivity matrix constructed from the T1 and diffusion weighted imaging data of the Human Connectome Project (WU-Minn HCP Data - 1200 Subjects release)	macro
connectome_human_vandenheuvel198855	82	1341	Van Den Heuvel (2015)	link	Tractography-based connectivity matrix constructed from the T1 and diffusion weighted imaging data of the Human Connectome Project (WU-Minn HCP Data - 1200 Subjects release)	macro
connectome_human_vandenheuvel199150	82	1158	Van Den Heuvel (2015)	link	Tractography-based connectivity matrix constructed from the T1 and diffusion weighted imaging data of the Human Connectome Project (WU-Minn HCP Data - 1200 Subjects release)	macro
connectome_human_vandenheuvel199251	82	1244	Van Den Heuvel (2015)	link	Tractography-based connectivity matrix constructed from the T1 and diffusion weighted imaging data of the Human Connectome Project (WU-Minn HCP Data - 1200 Subjects release)	macro
connectome_human_vandenheuvel199453	82	1234	Van Den Heuvel (2015)	link	Tractography-based connectivity matrix constructed from the T1 and diffusion weighted imaging data of the Human Connectome Project (WU-Minn HCP Data - 1200 Subjects release)	macro
connectome_human_vandenheuvel199655	82	1199	Van Den Heuvel (2015)	link	Tractography-based connectivity matrix constructed from the T1 and diffusion weighted imaging data of the Human Connectome Project (WU-Minn HCP Data - 1200 Subjects release)	macro
connectome_human_vandenheuvel199958	82	1140	Van Den Heuvel (2015)	link	Tractography-based connectivity matrix constructed from the T1 and diffusion weighted imaging data of the Human Connectome Project (WU-Minn HCP Data - 1200 Subjects release)	macro
connectome_human_vandenheuvel200109	82	1075	Van Den Heuvel (2015)	link	Tractography-based connectivity matrix constructed from the T1 and diffusion weighted imaging data of the Human Connectome Project (WU-Minn HCP Data - 1200 Subjects release)	macro
connectome_human_vandenheuvel200614	82	1129	Van Den Heuvel (2015)	link	Tractography-based connectivity matrix constructed from the T1 and diffusion weighted imaging data of the Human Connectome Project (WU-Minn HCP Data - 1200 Subjects release)	macro
connectome_human_vandenheuvel201111	82	1175	Van Den Heuvel (2015)	link	Tractography-based connectivity matrix constructed from the T1 and diffusion weighted imaging data of the Human Connectome Project (WU-Minn HCP Data - 1200 Subjects release)	macro
connectome_human_vandenheuvel201414	82	1302	Van Den Heuvel (2015)	link	Tractography-based connectivity matrix constructed from the T1 and diffusion weighted imaging data of the Human Connectome Project (WU-Minn HCP Data - 1200 Subjects release)	macro
connectome_human_vandenheuvel201818	82	1138	Van Den Heuvel (2015)	link	Tractography-based connectivity matrix constructed from the T1 and diffusion weighted imaging data of the Human Connectome Project (WU-Minn HCP Data - 1200 Subjects release)	macro
connectome_human_vandenheuvel203418	82	1156	Van Den Heuvel (2015)	link	Tractography-based connectivity matrix constructed from the T1 and diffusion weighted imaging data of the Human Connectome Project (WU-Minn HCP Data - 1200 Subjects release)	macro
connectome_human_vandenheuvel204016	82	1036	Van Den Heuvel (2015)	link	Tractography-based connectivity matrix constructed from the T1 and diffusion weighted imaging data of the Human Connectome Project (WU-Minn HCP Data - 1200 Subjects release)	macro
connectome_human_vandenheuvel204521	82	1101	Van Den Heuvel (2015)	link	Tractography-based connectivity matrix constructed from the T1 and diffusion weighted imaging data of the Human Connectome Project (WU-Minn HCP Data - 1200 Subjects release)	macro
connectome_human_vandenheuvel205119	82	1267	Van Den Heuvel (2015)	link	Tractography-based connectivity matrix constructed from the T1 and diffusion weighted imaging data of the Human Connectome Project (WU-Minn HCP Data - 1200 Subjects release)	macro
connectome_human_vandenheuvel205220	82	1201	Van Den Heuvel (2015)	link	Tractography-based connectivity matrix constructed from the T1 and diffusion weighted imaging data of the Human Connectome Project (WU-Minn HCP Data - 1200 Subjects release)	macro
connectome_human_vandenheuvel205725	82	1126	Van Den Heuvel (2015)	link	Tractography-based connectivity matrix constructed from the T1 and diffusion weighted imaging data of the Human Connectome Project (WU-Minn HCP Data - 1200 Subjects release)	macro
connectome_human_vandenheuvel205826	82	1192	Van Den Heuvel (2015)	link	Tractography-based connectivity matrix constructed from the T1 and diffusion weighted imaging data of the Human Connectome Project (WU-Minn HCP Data - 1200 Subjects release)	macro
connectome_human_vandenheuvel208024	82	1179	Van Den Heuvel (2015)	link	Tractography-based connectivity matrix constructed from the T1 and diffusion weighted imaging data of the Human Connectome Project (WU-Minn HCP Data - 1200 Subjects release)	macro
connectome_human_vandenheuvel208226	82	1116	Van Den Heuvel (2015)	link	Tractography-based connectivity matrix constructed from the T1 and diffusion weighted imaging data of the Human Connectome Project (WU-Minn HCP Data - 1200 Subjects release)	macro
connectome_human_vandenheuvel208327	82	1134	Van Den Heuvel (2015)	link	Tractography-based connectivity matrix constructed from the T1 and diffusion weighted imaging data of the Human Connectome Project (WU-Minn HCP Data - 1200 Subjects release)	macro
connectome_human_vandenheuvel208428	82	1031	Van Den Heuvel (2015)	link	Tractography-based connectivity matrix constructed from the T1 and diffusion weighted imaging data of the Human Connectome Project (WU-Minn HCP Data - 1200 Subjects release)	macro
connectome_human_vandenheuvel209834	82	1108	Van Den Heuvel (2015)	link	Tractography-based connectivity matrix constructed from the T1 and diffusion weighted imaging data of the Human Connectome Project (WU-Minn HCP Data - 1200 Subjects release)	macro
connectome_human_vandenheuvel209935	82	1218	Van Den Heuvel (2015)	link	Tractography-based connectivity matrix constructed from the T1 and diffusion weighted imaging data of the Human Connectome Project (WU-Minn HCP Data - 1200 Subjects release)	macro
connectome_human_vandenheuvel210011	82	1106	Van Den Heuvel (2015)	link	Tractography-based connectivity matrix constructed from the T1 and diffusion weighted imaging data of the Human Connectome Project (WU-Minn HCP Data - 1200 Subjects release)	macro
connectome_human_vandenheuvel210415	82	1226	Van Den Heuvel (2015)	link	Tractography-based connectivity matrix constructed from the T1 and diffusion weighted imaging data of the Human Connectome Project (WU-Minn HCP Data - 1200 Subjects release)	macro
connectome_human_vandenheuvel210617	82	1112	Van Den Heuvel (2015)	link	Tractography-based connectivity matrix constructed from the T1 and diffusion weighted imaging data of the Human Connectome Project (WU-Minn HCP Data - 1200 Subjects release)	macro
connectome_human_vandenheuvel211215	82	1089	Van Den Heuvel (2015)	link	Tractography-based connectivity matrix constructed from the T1 and diffusion weighted imaging data of the Human Connectome Project (WU-Minn HCP Data - 1200 Subjects release)	macro
connectome_human_vandenheuvel211316	82	960	Van Den Heuvel (2015)	link	Tractography-based connectivity matrix constructed from the T1 and diffusion weighted imaging data of the Human Connectome Project (WU-Minn HCP Data - 1200 Subjects release)	macro
connectome_human_vandenheuvel211417	82	1093	Van Den Heuvel (2015)	link	Tractography-based connectivity matrix constructed from the T1 and diffusion weighted imaging data of the Human Connectome Project (WU-Minn HCP Data - 1200 Subjects release)	macro
connectome_human_vandenheuvel211720	82	1170	Van Den Heuvel (2015)	link	Tractography-based connectivity matrix constructed from the T1 and diffusion weighted imaging data of the Human Connectome Project (WU-Minn HCP Data - 1200 Subjects release)	macro
connectome_human_vandenheuvel211922	82	1253	Van Den Heuvel (2015)	link	Tractography-based connectivity matrix constructed from the T1 and diffusion weighted imaging data of the Human Connectome Project (WU-Minn HCP Data - 1200 Subjects release)	macro
connectome_human_vandenheuvel212116	82	1145	Van Den Heuvel (2015)	link	Tractography-based connectivity matrix constructed from the T1 and diffusion weighted imaging data of the Human Connectome Project (WU-Minn HCP Data - 1200 Subjects release)	macro
connectome_human_vandenheuvel212217	82	1110	Van Den Heuvel (2015)	link	Tractography-based connectivity matrix constructed from the T1 and diffusion weighted imaging data of the Human Connectome Project (WU-Minn HCP Data - 1200 Subjects release)	macro
connectome_human_vandenheuvel212318	82	1254	Van Den Heuvel (2015)	link	Tractography-based connectivity matrix constructed from the T1 and diffusion weighted imaging data of the Human Connectome Project (WU-Minn HCP Data - 1200 Subjects release)	macro
connectome_human_vandenheuvel212419	82	1174	Van Den Heuvel (2015)	link	Tractography-based connectivity matrix constructed from the T1 and diffusion weighted imaging data of the Human Connectome Project (WU-Minn HCP Data - 1200 Subjects release)	macro
connectome_human_vandenheuvel214019	82	1237	Van Den Heuvel (2015)	link	Tractography-based connectivity matrix constructed from the T1 and diffusion weighted imaging data of the Human Connectome Project (WU-Minn HCP Data - 1200 Subjects release)	macro
connectome_human_vandenheuvel214221	82	1246	Van Den Heuvel (2015)	link	Tractography-based connectivity matrix constructed from the T1 and diffusion weighted imaging data of the Human Connectome Project (WU-Minn HCP Data - 1200 Subjects release)	macro
connectome_human_vandenheuvel214423	82	1140	Van Den Heuvel (2015)	link	Tractography-based connectivity matrix constructed from the T1 and diffusion weighted imaging data of the Human Connectome Project (WU-Minn HCP Data - 1200 Subjects release)	macro
connectome_human_vandenheuvel214726	82	1288	Van Den Heuvel (2015)	link	Tractography-based connectivity matrix constructed from the T1 and diffusion weighted imaging data of the Human Connectome Project (WU-Minn HCP Data - 1200 Subjects release)	macro
connectome_human_vandenheuvel217126	82	1072	Van Den Heuvel (2015)	link	Tractography-based connectivity matrix constructed from the T1 and diffusion weighted imaging data of the Human Connectome Project (WU-Minn HCP Data - 1200 Subjects release)	macro
connectome_human_vandenheuvel217429	82	1136	Van Den Heuvel (2015)	link	Tractography-based connectivity matrix constructed from the T1 and diffusion weighted imaging data of the Human Connectome Project (WU-Minn HCP Data - 1200 Subjects release)	macro
connectome_human_vandenheuvel221319	82	1069	Van Den Heuvel (2015)	link	Tractography-based connectivity matrix constructed from the T1 and diffusion weighted imaging data of the Human Connectome Project (WU-Minn HCP Data - 1200 Subjects release)	macro
connectome_human_vandenheuvel224022	82	1099	Van Den Heuvel (2015)	link	Tractography-based connectivity matrix constructed from the T1 and diffusion weighted imaging data of the Human Connectome Project (WU-Minn HCP Data - 1200 Subjects release)	macro
connectome_human_vandenheuvel231928	82	1111	Van Den Heuvel (2015)	link	Tractography-based connectivity matrix constructed from the T1 and diffusion weighted imaging data of the Human Connectome Project (WU-Minn HCP Data - 1200 Subjects release)	macro
connectome_human_vandenheuvel233326	82	1048	Van Den Heuvel (2015)	link	Tractography-based connectivity matrix constructed from the T1 and diffusion weighted imaging data of the Human Connectome Project (WU-Minn HCP Data - 1200 Subjects release)	macro
connectome_human_vandenheuvel239944	82	1096	Van Den Heuvel (2015)	link	Tractography-based connectivity matrix constructed from the T1 and diffusion weighted imaging data of the Human Connectome Project (WU-Minn HCP Data - 1200 Subjects release)	macro
connectome_human_vandenheuvel245333	82	1126	Van Den Heuvel (2015)	link	Tractography-based connectivity matrix constructed from the T1 and diffusion weighted imaging data of the Human Connectome Project (WU-Minn HCP Data - 1200 Subjects release)	macro
connectome_human_vandenheuvel246133	82	1121	Van Den Heuvel (2015)	link	Tractography-based connectivity matrix constructed from the T1 and diffusion weighted imaging data of the Human Connectome Project (WU-Minn HCP Data - 1200 Subjects release)	macro
connectome_human_vandenheuvel249947	82	1140	Van Den Heuvel (2015)	link	Tractography-based connectivity matrix constructed from the T1 and diffusion weighted imaging data of the Human Connectome Project (WU-Minn HCP Data - 1200 Subjects release)	macro
connectome_human_vandenheuvel250427	82	1064	Van Den Heuvel (2015)	link	Tractography-based connectivity matrix constructed from the T1 and diffusion weighted imaging data of the Human Connectome Project (WU-Minn HCP Data - 1200 Subjects release)	macro
connectome_human_vandenheuvel250932	82	1262	Van Den Heuvel (2015)	link	Tractography-based connectivity matrix constructed from the T1 and diffusion weighted imaging data of the Human Connectome Project (WU-Minn HCP Data - 1200 Subjects release)	macro
connectome_human_vandenheuvel251833	82	1149	Van Den Heuvel (2015)	link	Tractography-based connectivity matrix constructed from the T1 and diffusion weighted imaging data of the Human Connectome Project (WU-Minn HCP Data - 1200 Subjects release)	macro
connectome_human_vandenheuvel255639	82	1198	Van Den Heuvel (2015)	link	Tractography-based connectivity matrix constructed from the T1 and diffusion weighted imaging data of the Human Connectome Project (WU-Minn HCP Data - 1200 Subjects release)	macro
connectome_human_vandenheuvel256540	82	1051	Van Den Heuvel (2015)	link	Tractography-based connectivity matrix constructed from the T1 and diffusion weighted imaging data of the Human Connectome Project (WU-Minn HCP Data - 1200 Subjects release)	macro
connectome_human_vandenheuvel268850	82	1052	Van Den Heuvel (2015)	link	Tractography-based connectivity matrix constructed from the T1 and diffusion weighted imaging data of the Human Connectome Project (WU-Minn HCP Data - 1200 Subjects release)	macro
connectome_human_vandenheuvel280739	82	1113	Van Den Heuvel (2015)	link	Tractography-based connectivity matrix constructed from the T1 and diffusion weighted imaging data of the Human Connectome Project (WU-Minn HCP Data - 1200 Subjects release)	macro
connectome_human_vandenheuvel284646	82	1227	Van Den Heuvel (2015)	link	Tractography-based connectivity matrix constructed from the T1 and diffusion weighted imaging data of the Human Connectome Project (WU-Minn HCP Data - 1200 Subjects release)	macro
connectome_human_vandenheuvel285345	82	1171	Van Den Heuvel (2015)	link	Tractography-based connectivity matrix constructed from the T1 and diffusion weighted imaging data of the Human Connectome Project (WU-Minn HCP Data - 1200 Subjects release)	macro
connectome_human_vandenheuvel285446	82	1091	Van Den Heuvel (2015)	link	Tractography-based connectivity matrix constructed from the T1 and diffusion weighted imaging data of the Human Connectome Project (WU-Minn HCP Data - 1200 Subjects release)	macro
connectome_human_vandenheuvel289555	82	1300	Van Den Heuvel (2015)	link	Tractography-based connectivity matrix constructed from the T1 and diffusion weighted imaging data of the Human Connectome Project (WU-Minn HCP Data - 1200 Subjects release)	macro
connectome_human_vandenheuvel290136	82	1246	Van Den Heuvel (2015)	link	Tractography-based connectivity matrix constructed from the T1 and diffusion weighted imaging data of the Human Connectome Project (WU-Minn HCP Data - 1200 Subjects release)	macro
connectome_human_vandenheuvel293748	82	1055	Van Den Heuvel (2015)	link	Tractography-based connectivity matrix constructed from the T1 and diffusion weighted imaging data of the Human Connectome Project (WU-Minn HCP Data - 1200 Subjects release)	macro
connectome_human_vandenheuvel298051	82	1101	Van Den Heuvel (2015)	link	Tractography-based connectivity matrix constructed from the T1 and diffusion weighted imaging data of the Human Connectome Project (WU-Minn HCP Data - 1200 Subjects release)	macro
connectome_human_vandenheuvel298455	82	1087	Van Den Heuvel (2015)	link	Tractography-based connectivity matrix constructed from the T1 and diffusion weighted imaging data of the Human Connectome Project (WU-Minn HCP Data - 1200 Subjects release)	macro
connectome_human_vandenheuvel303119	82	1222	Van Den Heuvel (2015)	link	Tractography-based connectivity matrix constructed from the T1 and diffusion weighted imaging data of the Human Connectome Project (WU-Minn HCP Data - 1200 Subjects release)	macro
connectome_human_vandenheuvel303624	82	1137	Van Den Heuvel (2015)	link	Tractography-based connectivity matrix constructed from the T1 and diffusion weighted imaging data of the Human Connectome Project (WU-Minn HCP Data - 1200 Subjects release)	macro
connectome_human_vandenheuvel304020	82	1190	Van Den Heuvel (2015)	link	Tractography-based connectivity matrix constructed from the T1 and diffusion weighted imaging data of the Human Connectome Project (WU-Minn HCP Data - 1200 Subjects release)	macro
connectome_human_vandenheuvel307127	82	1180	Van Den Heuvel (2015)	link	Tractography-based connectivity matrix constructed from the T1 and diffusion weighted imaging data of the Human Connectome Project (WU-Minn HCP Data - 1200 Subjects release)	macro
connectome_human_vandenheuvel308331	82	1179	Van Den Heuvel (2015)	link	Tractography-based connectivity matrix constructed from the T1 and diffusion weighted imaging data of the Human Connectome Project (WU-Minn HCP Data - 1200 Subjects release)	macro
connectome_human_vandenheuvel310621	82	1164	Van Den Heuvel (2015)	link	Tractography-based connectivity matrix constructed from the T1 and diffusion weighted imaging data of the Human Connectome Project (WU-Minn HCP Data - 1200 Subjects release)	macro
connectome_human_vandenheuvel316633	82	1117	Van Den Heuvel (2015)	link	Tractography-based connectivity matrix constructed from the T1 and diffusion weighted imaging data of the Human Connectome Project (WU-Minn HCP Data - 1200 Subjects release)	macro
connectome_human_vandenheuvel329440	82	1171	Van Den Heuvel (2015)	link	Tractography-based connectivity matrix constructed from the T1 and diffusion weighted imaging data of the Human Connectome Project (WU-Minn HCP Data - 1200 Subjects release)	macro
connectome_human_vandenheuvel334635	82	1198	Van Den Heuvel (2015)	link	Tractography-based connectivity matrix constructed from the T1 and diffusion weighted imaging data of the Human Connectome Project (WU-Minn HCP Data - 1200 Subjects release)	macro
connectome_human_vandenheuvel339847	82	1309	Van Den Heuvel (2015)	link	Tractography-based connectivity matrix constructed from the T1 and diffusion weighted imaging data of the Human Connectome Project (WU-Minn HCP Data - 1200 Subjects release)	macro
connectome_human_vandenheuvel352132	82	1292	Van Den Heuvel (2015)	link	Tractography-based connectivity matrix constructed from the T1 and diffusion weighted imaging data of the Human Connectome Project (WU-Minn HCP Data - 1200 Subjects release)	macro
connectome_human_vandenheuvel352738	82	1046	Van Den Heuvel (2015)	link	Tractography-based connectivity matrix constructed from the T1 and diffusion weighted imaging data of the Human Connectome Project (WU-Minn HCP Data - 1200 Subjects release)	macro
connectome_human_vandenheuvel355239	82	1210	Van Den Heuvel (2015)	link	Tractography-based connectivity matrix constructed from the T1 and diffusion weighted imaging data of the Human Connectome Project (WU-Minn HCP Data - 1200 Subjects release)	macro
connectome_human_vandenheuvel356948	82	1087	Van Den Heuvel (2015)	link	Tractography-based connectivity matrix constructed from the T1 and diffusion weighted imaging data of the Human Connectome Project (WU-Minn HCP Data - 1200 Subjects release)	macro
connectome_human_vandenheuvel361941	82	1170	Van Den Heuvel (2015)	link	Tractography-based connectivity matrix constructed from the T1 and diffusion weighted imaging data of the Human Connectome Project (WU-Minn HCP Data - 1200 Subjects release)	macro
connectome_human_vandenheuvel365343	82	1209	Van Den Heuvel (2015)	link	Tractography-based connectivity matrix constructed from the T1 and diffusion weighted imaging data of the Human Connectome Project (WU-Minn HCP Data - 1200 Subjects release)	macro
connectome_human_vandenheuvel366042	82	1105	Van Den Heuvel (2015)	link	Tractography-based connectivity matrix constructed from the T1 and diffusion weighted imaging data of the Human Connectome Project (WU-Minn HCP Data - 1200 Subjects release)	macro
connectome_human_vandenheuvel366446	82	1275	Van Den Heuvel (2015)	link	Tractography-based connectivity matrix constructed from the T1 and diffusion weighted imaging data of the Human Connectome Project (WU-Minn HCP Data - 1200 Subjects release)	macro
connectome_human_vandenheuvel371843	82	1075	Van Den Heuvel (2015)	link	Tractography-based connectivity matrix constructed from the T1 and diffusion weighted imaging data of the Human Connectome Project (WU-Minn HCP Data - 1200 Subjects release)	macro
connectome_human_vandenheuvel377451	82	1184	Van Den Heuvel (2015)	link	Tractography-based connectivity matrix constructed from the T1 and diffusion weighted imaging data of the Human Connectome Project (WU-Minn HCP Data - 1200 Subjects release)	macro
connectome_human_vandenheuvel380036	82	1099	Van Den Heuvel (2015)	link	Tractography-based connectivity matrix constructed from the T1 and diffusion weighted imaging data of the Human Connectome Project (WU-Minn HCP Data - 1200 Subjects release)	macro
connectome_human_vandenheuvel382242	82	1021	Van Den Heuvel (2015)	link	Tractography-based connectivity matrix constructed from the T1 and diffusion weighted imaging data of the Human Connectome Project (WU-Minn HCP Data - 1200 Subjects release)	macro
connectome_human_vandenheuvel385450	82	1125	Van Den Heuvel (2015)	link	Tractography-based connectivity matrix constructed from the T1 and diffusion weighted imaging data of the Human Connectome Project (WU-Minn HCP Data - 1200 Subjects release)	macro
connectome_human_vandenheuvel386250	82	1126	Van Den Heuvel (2015)	link	Tractography-based connectivity matrix constructed from the T1 and diffusion weighted imaging data of the Human Connectome Project (WU-Minn HCP Data - 1200 Subjects release)	macro
connectome_human_vandenheuvel390645	82	1137	Van Den Heuvel (2015)	link	Tractography-based connectivity matrix constructed from the T1 and diffusion weighted imaging data of the Human Connectome Project (WU-Minn HCP Data - 1200 Subjects release)	macro
connectome_human_vandenheuvel395958	82	1048	Van Den Heuvel (2015)	link	Tractography-based connectivity matrix constructed from the T1 and diffusion weighted imaging data of the Human Connectome Project (WU-Minn HCP Data - 1200 Subjects release)	macro
connectome_human_vandenheuvel397154	82	1151	Van Den Heuvel (2015)	link	Tractography-based connectivity matrix constructed from the T1 and diffusion weighted imaging data of the Human Connectome Project (WU-Minn HCP Data - 1200 Subjects release)	macro
connectome_human_vandenheuvel397760	82	1252	Van Den Heuvel (2015)	link	Tractography-based connectivity matrix constructed from the T1 and diffusion weighted imaging data of the Human Connectome Project (WU-Minn HCP Data - 1200 Subjects release)	macro
connectome_human_vandenheuvel397861	82	1038	Van Den Heuvel (2015)	link	Tractography-based connectivity matrix constructed from the T1 and diffusion weighted imaging data of the Human Connectome Project (WU-Minn HCP Data - 1200 Subjects release)	macro
connectome_human_vandenheuvel412528	82	1237	Van Den Heuvel (2015)	link	Tractography-based connectivity matrix constructed from the T1 and diffusion weighted imaging data of the Human Connectome Project (WU-Minn HCP Data - 1200 Subjects release)	macro
connectome_human_vandenheuvel414229	82	1101	Van Den Heuvel (2015)	link	Tractography-based connectivity matrix constructed from the T1 and diffusion weighted imaging data of the Human Connectome Project (WU-Minn HCP Data - 1200 Subjects release)	macro
connectome_human_vandenheuvel415837	82	1251	Van Den Heuvel (2015)	link	Tractography-based connectivity matrix constructed from the T1 and diffusion weighted imaging data of the Human Connectome Project (WU-Minn HCP Data - 1200 Subjects release)	macro
connectome_human_vandenheuvel422632	82	1101	Van Den Heuvel (2015)	link	Tractography-based connectivity matrix constructed from the T1 and diffusion weighted imaging data of the Human Connectome Project (WU-Minn HCP Data - 1200 Subjects release)	macro
connectome_human_vandenheuvel433839	82	1113	Van Den Heuvel (2015)	link	Tractography-based connectivity matrix constructed from the T1 and diffusion weighted imaging data of the Human Connectome Project (WU-Minn HCP Data - 1200 Subjects release)	macro
connectome_human_vandenheuvel436239	82	1047	Van Den Heuvel (2015)	link	Tractography-based connectivity matrix constructed from the T1 and diffusion weighted imaging data of the Human Connectome Project (WU-Minn HCP Data - 1200 Subjects release)	macro
connectome_human_vandenheuvel436845	82	1134	Van Den Heuvel (2015)	link	Tractography-based connectivity matrix constructed from the T1 and diffusion weighted imaging data of the Human Connectome Project (WU-Minn HCP Data - 1200 Subjects release)	macro
connectome_human_vandenheuvel441939	82	1307	Van Den Heuvel (2015)	link	Tractography-based connectivity matrix constructed from the T1 and diffusion weighted imaging data of the Human Connectome Project (WU-Minn HCP Data - 1200 Subjects release)	macro
connectome_human_vandenheuvel445543	82	1178	Van Den Heuvel (2015)	link	Tractography-based connectivity matrix constructed from the T1 and diffusion weighted imaging data of the Human Connectome Project (WU-Minn HCP Data - 1200 Subjects release)	macro
connectome_human_vandenheuvel448347	82	1215	Van Den Heuvel (2015)	link	Tractography-based connectivity matrix constructed from the T1 and diffusion weighted imaging data of the Human Connectome Project (WU-Minn HCP Data - 1200 Subjects release)	macro
connectome_human_vandenheuvel465852	82	1236	Van Den Heuvel (2015)	link	Tractography-based connectivity matrix constructed from the T1 and diffusion weighted imaging data of the Human Connectome Project (WU-Minn HCP Data - 1200 Subjects release)	macro
connectome_human_vandenheuvel473952	82	1133	Van Den Heuvel (2015)	link	Tractography-based connectivity matrix constructed from the T1 and diffusion weighted imaging data of the Human Connectome Project (WU-Minn HCP Data - 1200 Subjects release)	macro
connectome_human_vandenheuvel475855	82	1319	Van Den Heuvel (2015)	link	Tractography-based connectivity matrix constructed from the T1 and diffusion weighted imaging data of the Human Connectome Project (WU-Minn HCP Data - 1200 Subjects release)	macro
connectome_human_vandenheuvel479762	82	1111	Van Den Heuvel (2015)	link	Tractography-based connectivity matrix constructed from the T1 and diffusion weighted imaging data of the Human Connectome Project (WU-Minn HCP Data - 1200 Subjects release)	macro
connectome_human_vandenheuvel480141	82	980	Van Den Heuvel (2015)	link	Tractography-based connectivity matrix constructed from the T1 and diffusion weighted imaging data of the Human Connectome Project (WU-Minn HCP Data - 1200 Subjects release)	macro
connectome_human_vandenheuvel485757	82	1139	Van Den Heuvel (2015)	link	Tractography-based connectivity matrix constructed from the T1 and diffusion weighted imaging data of the Human Connectome Project (WU-Minn HCP Data - 1200 Subjects release)	macro
connectome_human_vandenheuvel486759	82	1034	Van Den Heuvel (2015)	link	Tractography-based connectivity matrix constructed from the T1 and diffusion weighted imaging data of the Human Connectome Project (WU-Minn HCP Data - 1200 Subjects release)	macro
connectome_human_vandenheuvel497865	82	1156	Van Den Heuvel (2015)	link	Tractography-based connectivity matrix constructed from the T1 and diffusion weighted imaging data of the Human Connectome Project (WU-Minn HCP Data - 1200 Subjects release)	macro
connectome_human_vandenheuvel499566	82	1134	Van Den Heuvel (2015)	link	Tractography-based connectivity matrix constructed from the T1 and diffusion weighted imaging data of the Human Connectome Project (WU-Minn HCP Data - 1200 Subjects release)	macro
connectome_human_vandenheuvel500222	82	1042	Van Den Heuvel (2015)	link	Tractography-based connectivity matrix constructed from the T1 and diffusion weighted imaging data of the Human Connectome Project (WU-Minn HCP Data - 1200 Subjects release)	macro
connectome_human_vandenheuvel510326	82	1154	Van Den Heuvel (2015)	link	Tractography-based connectivity matrix constructed from the T1 and diffusion weighted imaging data of the Human Connectome Project (WU-Minn HCP Data - 1200 Subjects release)	macro
connectome_human_vandenheuvel519950	82	1168	Van Den Heuvel (2015)	link	Tractography-based connectivity matrix constructed from the T1 and diffusion weighted imaging data of the Human Connectome Project (WU-Minn HCP Data - 1200 Subjects release)	macro
connectome_human_vandenheuvel521331	82	1113	Van Den Heuvel (2015)	link	Tractography-based connectivity matrix constructed from the T1 and diffusion weighted imaging data of the Human Connectome Project (WU-Minn HCP Data - 1200 Subjects release)	macro
connectome_human_vandenheuvel522434	82	1161	Van Den Heuvel (2015)	link	Tractography-based connectivity matrix constructed from the T1 and diffusion weighted imaging data of the Human Connectome Project (WU-Minn HCP Data - 1200 Subjects release)	macro
connectome_human_vandenheuvel530635	82	1336	Van Den Heuvel (2015)	link	Tractography-based connectivity matrix constructed from the T1 and diffusion weighted imaging data of the Human Connectome Project (WU-Minn HCP Data - 1200 Subjects release)	macro
connectome_human_vandenheuvel531536	82	1229	Van Den Heuvel (2015)	link	Tractography-based connectivity matrix constructed from the T1 and diffusion weighted imaging data of the Human Connectome Project (WU-Minn HCP Data - 1200 Subjects release)	macro
connectome_human_vandenheuvel540436	82	1166	Van Den Heuvel (2015)	link	Tractography-based connectivity matrix constructed from the T1 and diffusion weighted imaging data of the Human Connectome Project (WU-Minn HCP Data - 1200 Subjects release)	macro
connectome_human_vandenheuvel541943	82	1099	Van Den Heuvel (2015)	link	Tractography-based connectivity matrix constructed from the T1 and diffusion weighted imaging data of the Human Connectome Project (WU-Minn HCP Data - 1200 Subjects release)	macro
connectome_human_vandenheuvel545345	82	1167	Van Den Heuvel (2015)	link	Tractography-based connectivity matrix constructed from the T1 and diffusion weighted imaging data of the Human Connectome Project (WU-Minn HCP Data - 1200 Subjects release)	macro
connectome_human_vandenheuvel547046	82	1303	Van Den Heuvel (2015)	link	Tractography-based connectivity matrix constructed from the T1 and diffusion weighted imaging data of the Human Connectome Project (WU-Minn HCP Data - 1200 Subjects release)	macro
connectome_human_vandenheuvel559053	82	1129	Van Den Heuvel (2015)	link	Tractography-based connectivity matrix constructed from the T1 and diffusion weighted imaging data of the Human Connectome Project (WU-Minn HCP Data - 1200 Subjects release)	macro
connectome_human_vandenheuvel561242	82	1136	Van Den Heuvel (2015)	link	Tractography-based connectivity matrix constructed from the T1 and diffusion weighted imaging data of the Human Connectome Project (WU-Minn HCP Data - 1200 Subjects release)	macro
connectome_human_vandenheuvel562446	82	1225	Van Den Heuvel (2015)	link	Tractography-based connectivity matrix constructed from the T1 and diffusion weighted imaging data of the Human Connectome Project (WU-Minn HCP Data - 1200 Subjects release)	macro
connectome_human_vandenheuvel565452	82	1171	Van Den Heuvel (2015)	link	Tractography-based connectivity matrix constructed from the T1 and diffusion weighted imaging data of the Human Connectome Project (WU-Minn HCP Data - 1200 Subjects release)	macro
connectome_human_vandenheuvel566454	82	1254	Van Den Heuvel (2015)	link	Tractography-based connectivity matrix constructed from the T1 and diffusion weighted imaging data of the Human Connectome Project (WU-Minn HCP Data - 1200 Subjects release)	macro
connectome_human_vandenheuvel567052	82	1058	Van Den Heuvel (2015)	link	Tractography-based connectivity matrix constructed from the T1 and diffusion weighted imaging data of the Human Connectome Project (WU-Minn HCP Data - 1200 Subjects release)	macro
connectome_human_vandenheuvel567961	82	1231	Van Den Heuvel (2015)	link	Tractography-based connectivity matrix constructed from the T1 and diffusion weighted imaging data of the Human Connectome Project (WU-Minn HCP Data - 1200 Subjects release)	macro
connectome_human_vandenheuvel568963	82	1103	Van Den Heuvel (2015)	link	Tractography-based connectivity matrix constructed from the T1 and diffusion weighted imaging data of the Human Connectome Project (WU-Minn HCP Data - 1200 Subjects release)	macro
connectome_human_vandenheuvel570243	82	1175	Van Den Heuvel (2015)	link	Tractography-based connectivity matrix constructed from the T1 and diffusion weighted imaging data of the Human Connectome Project (WU-Minn HCP Data - 1200 Subjects release)	macro
connectome_human_vandenheuvel571548	82	1027	Van Den Heuvel (2015)	link	Tractography-based connectivity matrix constructed from the T1 and diffusion weighted imaging data of the Human Connectome Project (WU-Minn HCP Data - 1200 Subjects release)	macro
connectome_human_vandenheuvel573249	82	1165	Van Den Heuvel (2015)	link	Tractography-based connectivity matrix constructed from the T1 and diffusion weighted imaging data of the Human Connectome Project (WU-Minn HCP Data - 1200 Subjects release)	macro
connectome_human_vandenheuvel573451	82	1132	Van Den Heuvel (2015)	link	Tractography-based connectivity matrix constructed from the T1 and diffusion weighted imaging data of the Human Connectome Project (WU-Minn HCP Data - 1200 Subjects release)	macro
connectome_human_vandenheuvel579665	82	1252	Van Den Heuvel (2015)	link	Tractography-based connectivity matrix constructed from the T1 and diffusion weighted imaging data of the Human Connectome Project (WU-Minn HCP Data - 1200 Subjects release)	macro
connectome_human_vandenheuvel580044	82	1069	Van Den Heuvel (2015)	link	Tractography-based connectivity matrix constructed from the T1 and diffusion weighted imaging data of the Human Connectome Project (WU-Minn HCP Data - 1200 Subjects release)	macro
connectome_human_vandenheuvel580347	82	1246	Van Den Heuvel (2015)	link	Tractography-based connectivity matrix constructed from the T1 and diffusion weighted imaging data of the Human Connectome Project (WU-Minn HCP Data - 1200 Subjects release)	macro
connectome_human_vandenheuvel581349	82	1217	Van Den Heuvel (2015)	link	Tractography-based connectivity matrix constructed from the T1 and diffusion weighted imaging data of the Human Connectome Project (WU-Minn HCP Data - 1200 Subjects release)	macro
connectome_human_vandenheuvel583858	82	1024	Van Den Heuvel (2015)	link	Tractography-based connectivity matrix constructed from the T1 and diffusion weighted imaging data of the Human Connectome Project (WU-Minn HCP Data - 1200 Subjects release)	macro
connectome_human_vandenheuvel585862	82	1234	Van Den Heuvel (2015)	link	Tractography-based connectivity matrix constructed from the T1 and diffusion weighted imaging data of the Human Connectome Project (WU-Minn HCP Data - 1200 Subjects release)	macro
connectome_human_vandenheuvel586460	82	1022	Van Den Heuvel (2015)	link	Tractography-based connectivity matrix constructed from the T1 and diffusion weighted imaging data of the Human Connectome Project (WU-Minn HCP Data - 1200 Subjects release)	macro
connectome_human_vandenheuvel592455	82	1125	Van Den Heuvel (2015)	link	Tractography-based connectivity matrix constructed from the T1 and diffusion weighted imaging data of the Human Connectome Project (WU-Minn HCP Data - 1200 Subjects release)	macro
connectome_human_vandenheuvel594156	82	1121	Van Den Heuvel (2015)	link	Tractography-based connectivity matrix constructed from the T1 and diffusion weighted imaging data of the Human Connectome Project (WU-Minn HCP Data - 1200 Subjects release)	macro
connectome_human_vandenheuvel598568	82	1317	Van Den Heuvel (2015)	link	Tractography-based connectivity matrix constructed from the T1 and diffusion weighted imaging data of the Human Connectome Project (WU-Minn HCP Data - 1200 Subjects release)	macro
connectome_human_vandenheuvel599469	82	1269	Van Den Heuvel (2015)	link	Tractography-based connectivity matrix constructed from the T1 and diffusion weighted imaging data of the Human Connectome Project (WU-Minn HCP Data - 1200 Subjects release)	macro
connectome_human_vandenheuvel599671	82	1215	Van Den Heuvel (2015)	link	Tractography-based connectivity matrix constructed from the T1 and diffusion weighted imaging data of the Human Connectome Project (WU-Minn HCP Data - 1200 Subjects release)	macro
connectome_human_vandenheuvel601127	82	1138	Van Den Heuvel (2015)	link	Tractography-based connectivity matrix constructed from the T1 and diffusion weighted imaging data of the Human Connectome Project (WU-Minn HCP Data - 1200 Subjects release)	macro
connectome_human_vandenheuvel613538	82	1202	Van Den Heuvel (2015)	link	Tractography-based connectivity matrix constructed from the T1 and diffusion weighted imaging data of the Human Connectome Project (WU-Minn HCP Data - 1200 Subjects release)	macro
connectome_human_vandenheuvel620434	82	1202	Van Den Heuvel (2015)	link	Tractography-based connectivity matrix constructed from the T1 and diffusion weighted imaging data of the Human Connectome Project (WU-Minn HCP Data - 1200 Subjects release)	macro
connectome_human_vandenheuvel622236	82	1107	Van Den Heuvel (2015)	link	Tractography-based connectivity matrix constructed from the T1 and diffusion weighted imaging data of the Human Connectome Project (WU-Minn HCP Data - 1200 Subjects release)	macro
connectome_human_vandenheuvel623844	82	1230	Van Den Heuvel (2015)	link	Tractography-based connectivity matrix constructed from the T1 and diffusion weighted imaging data of the Human Connectome Project (WU-Minn HCP Data - 1200 Subjects release)	macro
connectome_human_vandenheuvel627549	82	1159	Van Den Heuvel (2015)	link	Tractography-based connectivity matrix constructed from the T1 and diffusion weighted imaging data of the Human Connectome Project (WU-Minn HCP Data - 1200 Subjects release)	macro
connectome_human_vandenheuvel638049	82	1069	Van Den Heuvel (2015)	link	Tractography-based connectivity matrix constructed from the T1 and diffusion weighted imaging data of the Human Connectome Project (WU-Minn HCP Data - 1200 Subjects release)	macro
connectome_human_vandenheuvel644044	82	1169	Van Den Heuvel (2015)	link	Tractography-based connectivity matrix constructed from the T1 and diffusion weighted imaging data of the Human Connectome Project (WU-Minn HCP Data - 1200 Subjects release)	macro
connectome_human_vandenheuvel645551	82	1016	Van Den Heuvel (2015)	link	Tractography-based connectivity matrix constructed from the T1 and diffusion weighted imaging data of the Human Connectome Project (WU-Minn HCP Data - 1200 Subjects release)	macro
connectome_human_vandenheuvel654754	82	1236	Van Den Heuvel (2015)	link	Tractography-based connectivity matrix constructed from the T1 and diffusion weighted imaging data of the Human Connectome Project (WU-Minn HCP Data - 1200 Subjects release)	macro
connectome_human_vandenheuvel665254	82	1086	Van Den Heuvel (2015)	link	Tractography-based connectivity matrix constructed from the T1 and diffusion weighted imaging data of the Human Connectome Project (WU-Minn HCP Data - 1200 Subjects release)	macro
connectome_human_vandenheuvel672756	82	1192	Van Den Heuvel (2015)	link	Tractography-based connectivity matrix constructed from the T1 and diffusion weighted imaging data of the Human Connectome Project (WU-Minn HCP Data - 1200 Subjects release)	macro
connectome_human_vandenheuvel673455	82	1232	Van Den Heuvel (2015)	link	Tractography-based connectivity matrix constructed from the T1 and diffusion weighted imaging data of the Human Connectome Project (WU-Minn HCP Data - 1200 Subjects release)	macro
connectome_human_vandenheuvel677968	82	1160	Van Den Heuvel (2015)	link	Tractography-based connectivity matrix constructed from the T1 and diffusion weighted imaging data of the Human Connectome Project (WU-Minn HCP Data - 1200 Subjects release)	macro
connectome_human_vandenheuvel679568	82	1195	Van Den Heuvel (2015)	link	Tractography-based connectivity matrix constructed from the T1 and diffusion weighted imaging data of the Human Connectome Project (WU-Minn HCP Data - 1200 Subjects release)	macro
connectome_human_vandenheuvel680957	82	1323	Van Den Heuvel (2015)	link	Tractography-based connectivity matrix constructed from the T1 and diffusion weighted imaging data of the Human Connectome Project (WU-Minn HCP Data - 1200 Subjects release)	macro
connectome_human_vandenheuvel683256	82	1018	Van Den Heuvel (2015)	link	Tractography-based connectivity matrix constructed from the T1 and diffusion weighted imaging data of the Human Connectome Project (WU-Minn HCP Data - 1200 Subjects release)	macro
connectome_human_vandenheuvel685058	82	1218	Van Den Heuvel (2015)	link	Tractography-based connectivity matrix constructed from the T1 and diffusion weighted imaging data of the Human Connectome Project (WU-Minn HCP Data - 1200 Subjects release)	macro
connectome_human_vandenheuvel687163	82	1255	Van Den Heuvel (2015)	link	Tractography-based connectivity matrix constructed from the T1 and diffusion weighted imaging data of the Human Connectome Project (WU-Minn HCP Data - 1200 Subjects release)	macro
connectome_human_vandenheuvel690152	82	1194	Van Den Heuvel (2015)	link	Tractography-based connectivity matrix constructed from the T1 and diffusion weighted imaging data of the Human Connectome Project (WU-Minn HCP Data - 1200 Subjects release)	macro
connectome_human_vandenheuvel695768	82	1123	Van Den Heuvel (2015)	link	Tractography-based connectivity matrix constructed from the T1 and diffusion weighted imaging data of the Human Connectome Project (WU-Minn HCP Data - 1200 Subjects release)	macro
connectome_human_vandenheuvel702133	82	1106	Van Den Heuvel (2015)	link	Tractography-based connectivity matrix constructed from the T1 and diffusion weighted imaging data of the Human Connectome Project (WU-Minn HCP Data - 1200 Subjects release)	macro
connectome_human_vandenheuvel704238	82	1090	Van Den Heuvel (2015)	link	Tractography-based connectivity matrix constructed from the T1 and diffusion weighted imaging data of the Human Connectome Project (WU-Minn HCP Data - 1200 Subjects release)	macro
connectome_human_vandenheuvel705341	82	1097	Van Den Heuvel (2015)	link	Tractography-based connectivity matrix constructed from the T1 and diffusion weighted imaging data of the Human Connectome Project (WU-Minn HCP Data - 1200 Subjects release)	macro
connectome_human_vandenheuvel709551	82	1242	Van Den Heuvel (2015)	link	Tractography-based connectivity matrix constructed from the T1 and diffusion weighted imaging data of the Human Connectome Project (WU-Minn HCP Data - 1200 Subjects release)	macro
connectome_human_vandenheuvel713239	82	1040	Van Den Heuvel (2015)	link	Tractography-based connectivity matrix constructed from the T1 and diffusion weighted imaging data of the Human Connectome Project (WU-Minn HCP Data - 1200 Subjects release)	macro
connectome_human_vandenheuvel715041	82	1107	Van Den Heuvel (2015)	link	Tractography-based connectivity matrix constructed from the T1 and diffusion weighted imaging data of the Human Connectome Project (WU-Minn HCP Data - 1200 Subjects release)	macro
connectome_human_vandenheuvel715647	82	1107	Van Den Heuvel (2015)	link	Tractography-based connectivity matrix constructed from the T1 and diffusion weighted imaging data of the Human Connectome Project (WU-Minn HCP Data - 1200 Subjects release)	macro
connectome_human_vandenheuvel729254	82	1268	Van Den Heuvel (2015)	link	Tractography-based connectivity matrix constructed from the T1 and diffusion weighted imaging data of the Human Connectome Project (WU-Minn HCP Data - 1200 Subjects release)	macro
connectome_human_vandenheuvel729557	82	1254	Van Den Heuvel (2015)	link	Tractography-based connectivity matrix constructed from the T1 and diffusion weighted imaging data of the Human Connectome Project (WU-Minn HCP Data - 1200 Subjects release)	macro
connectome_human_vandenheuvel732243	82	1172	Van Den Heuvel (2015)	link	Tractography-based connectivity matrix constructed from the T1 and diffusion weighted imaging data of the Human Connectome Project (WU-Minn HCP Data - 1200 Subjects release)	macro
connectome_human_vandenheuvel734045	82	1206	Van Den Heuvel (2015)	link	Tractography-based connectivity matrix constructed from the T1 and diffusion weighted imaging data of the Human Connectome Project (WU-Minn HCP Data - 1200 Subjects release)	macro
connectome_human_vandenheuvel742549	82	1202	Van Den Heuvel (2015)	link	Tractography-based connectivity matrix constructed from the T1 and diffusion weighted imaging data of the Human Connectome Project (WU-Minn HCP Data - 1200 Subjects release)	macro
connectome_human_vandenheuvel748258	82	1101	Van Den Heuvel (2015)	link	Tractography-based connectivity matrix constructed from the T1 and diffusion weighted imaging data of the Human Connectome Project (WU-Minn HCP Data - 1200 Subjects release)	macro
connectome_human_vandenheuvel748662	82	1144	Van Den Heuvel (2015)	link	Tractography-based connectivity matrix constructed from the T1 and diffusion weighted imaging data of the Human Connectome Project (WU-Minn HCP Data - 1200 Subjects release)	macro
connectome_human_vandenheuvel749361	82	1037	Van Den Heuvel (2015)	link	Tractography-based connectivity matrix constructed from the T1 and diffusion weighted imaging data of the Human Connectome Project (WU-Minn HCP Data - 1200 Subjects release)	macro
connectome_human_vandenheuvel751348	82	1103	Van Den Heuvel (2015)	link	Tractography-based connectivity matrix constructed from the T1 and diffusion weighted imaging data of the Human Connectome Project (WU-Minn HCP Data - 1200 Subjects release)	macro
connectome_human_vandenheuvel753251	82	1073	Van Den Heuvel (2015)	link	Tractography-based connectivity matrix constructed from the T1 and diffusion weighted imaging data of the Human Connectome Project (WU-Minn HCP Data - 1200 Subjects release)	macro
connectome_human_vandenheuvel756055	82	1252	Van Den Heuvel (2015)	link	Tractography-based connectivity matrix constructed from the T1 and diffusion weighted imaging data of the Human Connectome Project (WU-Minn HCP Data - 1200 Subjects release)	macro
connectome_human_vandenheuvel759869	82	1212	Van Den Heuvel (2015)	link	Tractography-based connectivity matrix constructed from the T1 and diffusion weighted imaging data of the Human Connectome Project (WU-Minn HCP Data - 1200 Subjects release)	macro
connectome_human_vandenheuvel761957	82	1241	Van Den Heuvel (2015)	link	Tractography-based connectivity matrix constructed from the T1 and diffusion weighted imaging data of the Human Connectome Project (WU-Minn HCP Data - 1200 Subjects release)	macro
connectome_human_vandenheuvel765056	82	1101	Van Den Heuvel (2015)	link	Tractography-based connectivity matrix constructed from the T1 and diffusion weighted imaging data of the Human Connectome Project (WU-Minn HCP Data - 1200 Subjects release)	macro
connectome_human_vandenheuvel770352	82	1181	Van Den Heuvel (2015)	link	Tractography-based connectivity matrix constructed from the T1 and diffusion weighted imaging data of the Human Connectome Project (WU-Minn HCP Data - 1200 Subjects release)	macro
connectome_human_vandenheuvel771354	82	1085	Van Den Heuvel (2015)	link	Tractography-based connectivity matrix constructed from the T1 and diffusion weighted imaging data of the Human Connectome Project (WU-Minn HCP Data - 1200 Subjects release)	macro
connectome_human_vandenheuvel779370	82	1224	Van Den Heuvel (2015)	link	Tractography-based connectivity matrix constructed from the T1 and diffusion weighted imaging data of the Human Connectome Project (WU-Minn HCP Data - 1200 Subjects release)	macro
connectome_human_vandenheuvel782561	82	1190	Van Den Heuvel (2015)	link	Tractography-based connectivity matrix constructed from the T1 and diffusion weighted imaging data of the Human Connectome Project (WU-Minn HCP Data - 1200 Subjects release)	macro
connectome_human_vandenheuvel784565	82	1254	Van Den Heuvel (2015)	link	Tractography-based connectivity matrix constructed from the T1 and diffusion weighted imaging data of the Human Connectome Project (WU-Minn HCP Data - 1200 Subjects release)	macro
connectome_human_vandenheuvel786569	82	1258	Van Den Heuvel (2015)	link	Tractography-based connectivity matrix constructed from the T1 and diffusion weighted imaging data of the Human Connectome Project (WU-Minn HCP Data - 1200 Subjects release)	macro
connectome_human_vandenheuvel788876	82	1161	Van Den Heuvel (2015)	link	Tractography-based connectivity matrix constructed from the T1 and diffusion weighted imaging data of the Human Connectome Project (WU-Minn HCP Data - 1200 Subjects release)	macro
connectome_human_vandenheuvel789373	82	1053	Van Den Heuvel (2015)	link	Tractography-based connectivity matrix constructed from the T1 and diffusion weighted imaging data of the Human Connectome Project (WU-Minn HCP Data - 1200 Subjects release)	macro
connectome_human_vandenheuvel792564	82	1224	Van Den Heuvel (2015)	link	Tractography-based connectivity matrix constructed from the T1 and diffusion weighted imaging data of the Human Connectome Project (WU-Minn HCP Data - 1200 Subjects release)	macro
connectome_human_vandenheuvel792766	82	1319	Van Den Heuvel (2015)	link	Tractography-based connectivity matrix constructed from the T1 and diffusion weighted imaging data of the Human Connectome Project (WU-Minn HCP Data - 1200 Subjects release)	macro
connectome_human_vandenheuvel802844	82	1125	Van Den Heuvel (2015)	link	Tractography-based connectivity matrix constructed from the T1 and diffusion weighted imaging data of the Human Connectome Project (WU-Minn HCP Data - 1200 Subjects release)	macro
connectome_human_vandenheuvel814649	82	1192	Van Den Heuvel (2015)	link	Tractography-based connectivity matrix constructed from the T1 and diffusion weighted imaging data of the Human Connectome Project (WU-Minn HCP Data - 1200 Subjects release)	macro
connectome_human_vandenheuvel816653	82	1133	Van Den Heuvel (2015)	link	Tractography-based connectivity matrix constructed from the T1 and diffusion weighted imaging data of the Human Connectome Project (WU-Minn HCP Data - 1200 Subjects release)	macro
connectome_human_vandenheuvel826353	82	1127	Van Den Heuvel (2015)	link	Tractography-based connectivity matrix constructed from the T1 and diffusion weighted imaging data of the Human Connectome Project (WU-Minn HCP Data - 1200 Subjects release)	macro
connectome_human_vandenheuvel826454	82	1142	Van Den Heuvel (2015)	link	Tractography-based connectivity matrix constructed from the T1 and diffusion weighted imaging data of the Human Connectome Project (WU-Minn HCP Data - 1200 Subjects release)	macro
connectome_human_vandenheuvel833148	82	1139	Van Den Heuvel (2015)	link	Tractography-based connectivity matrix constructed from the T1 and diffusion weighted imaging data of the Human Connectome Project (WU-Minn HCP Data - 1200 Subjects release)	macro
connectome_human_vandenheuvel833249	82	1260	Van Den Heuvel (2015)	link	Tractography-based connectivity matrix constructed from the T1 and diffusion weighted imaging data of the Human Connectome Project (WU-Minn HCP Data - 1200 Subjects release)	macro
connectome_human_vandenheuvel837560	82	1303	Van Den Heuvel (2015)	link	Tractography-based connectivity matrix constructed from the T1 and diffusion weighted imaging data of the Human Connectome Project (WU-Minn HCP Data - 1200 Subjects release)	macro
connectome_human_vandenheuvel837964	82	1164	Van Den Heuvel (2015)	link	Tractography-based connectivity matrix constructed from the T1 and diffusion weighted imaging data of the Human Connectome Project (WU-Minn HCP Data - 1200 Subjects release)	macro
connectome_human_vandenheuvel845458	82	1237	Van Den Heuvel (2015)	link	Tractography-based connectivity matrix constructed from the T1 and diffusion weighted imaging data of the Human Connectome Project (WU-Minn HCP Data - 1200 Subjects release)	macro
connectome_human_vandenheuvel849971	82	1079	Van Den Heuvel (2015)	link	Tractography-based connectivity matrix constructed from the T1 and diffusion weighted imaging data of the Human Connectome Project (WU-Minn HCP Data - 1200 Subjects release)	macro
connectome_human_vandenheuvel856766	82	1242	Van Den Heuvel (2015)	link	Tractography-based connectivity matrix constructed from the T1 and diffusion weighted imaging data of the Human Connectome Project (WU-Minn HCP Data - 1200 Subjects release)	macro
connectome_human_vandenheuvel857263	82	1265	Van Den Heuvel (2015)	link	Tractography-based connectivity matrix constructed from the T1 and diffusion weighted imaging data of the Human Connectome Project (WU-Minn HCP Data - 1200 Subjects release)	macro
connectome_human_vandenheuvel859671	82	1141	Van Den Heuvel (2015)	link	Tractography-based connectivity matrix constructed from the T1 and diffusion weighted imaging data of the Human Connectome Project (WU-Minn HCP Data - 1200 Subjects release)	macro
connectome_human_vandenheuvel861456	82	1116	Van Den Heuvel (2015)	link	Tractography-based connectivity matrix constructed from the T1 and diffusion weighted imaging data of the Human Connectome Project (WU-Minn HCP Data - 1200 Subjects release)	macro
connectome_human_vandenheuvel865363	82	1143	Van Den Heuvel (2015)	link	Tractography-based connectivity matrix constructed from the T1 and diffusion weighted imaging data of the Human Connectome Project (WU-Minn HCP Data - 1200 Subjects release)	macro
connectome_human_vandenheuvel871762	82	1111	Van Den Heuvel (2015)	link	Tractography-based connectivity matrix constructed from the T1 and diffusion weighted imaging data of the Human Connectome Project (WU-Minn HCP Data - 1200 Subjects release)	macro
connectome_human_vandenheuvel871964	82	1203	Van Den Heuvel (2015)	link	Tractography-based connectivity matrix constructed from the T1 and diffusion weighted imaging data of the Human Connectome Project (WU-Minn HCP Data - 1200 Subjects release)	macro
connectome_human_vandenheuvel872158	82	1388	Van Den Heuvel (2015)	link	Tractography-based connectivity matrix constructed from the T1 and diffusion weighted imaging data of the Human Connectome Project (WU-Minn HCP Data - 1200 Subjects release)	macro
connectome_human_vandenheuvel872764	82	1208	Van Den Heuvel (2015)	link	Tractography-based connectivity matrix constructed from the T1 and diffusion weighted imaging data of the Human Connectome Project (WU-Minn HCP Data - 1200 Subjects release)	macro
connectome_human_vandenheuvel877168	82	1140	Van Den Heuvel (2015)	link	Tractography-based connectivity matrix constructed from the T1 and diffusion weighted imaging data of the Human Connectome Project (WU-Minn HCP Data - 1200 Subjects release)	macro
connectome_human_vandenheuvel877269	82	1237	Van Den Heuvel (2015)	link	Tractography-based connectivity matrix constructed from the T1 and diffusion weighted imaging data of the Human Connectome Project (WU-Minn HCP Data - 1200 Subjects release)	macro
connectome_human_vandenheuvel885975	82	1022	Van Den Heuvel (2015)	link	Tractography-based connectivity matrix constructed from the T1 and diffusion weighted imaging data of the Human Connectome Project (WU-Minn HCP Data - 1200 Subjects release)	macro
connectome_human_vandenheuvel887373	82	1163	Van Den Heuvel (2015)	link	Tractography-based connectivity matrix constructed from the T1 and diffusion weighted imaging data of the Human Connectome Project (WU-Minn HCP Data - 1200 Subjects release)	macro
connectome_human_vandenheuvel889579	82	1071	Van Den Heuvel (2015)	link	Tractography-based connectivity matrix constructed from the T1 and diffusion weighted imaging data of the Human Connectome Project (WU-Minn HCP Data - 1200 Subjects release)	macro
connectome_human_vandenheuvel894673	82	1115	Van Den Heuvel (2015)	link	Tractography-based connectivity matrix constructed from the T1 and diffusion weighted imaging data of the Human Connectome Project (WU-Minn HCP Data - 1200 Subjects release)	macro
connectome_human_vandenheuvel896778	82	1169	Van Den Heuvel (2015)	link	Tractography-based connectivity matrix constructed from the T1 and diffusion weighted imaging data of the Human Connectome Project (WU-Minn HCP Data - 1200 Subjects release)	macro
connectome_human_vandenheuvel896879	82	1131	Van Den Heuvel (2015)	link	Tractography-based connectivity matrix constructed from the T1 and diffusion weighted imaging data of the Human Connectome Project (WU-Minn HCP Data - 1200 Subjects release)	macro
connectome_human_vandenheuvel898176	82	1173	Van Den Heuvel (2015)	link	Tractography-based connectivity matrix constructed from the T1 and diffusion weighted imaging data of the Human Connectome Project (WU-Minn HCP Data - 1200 Subjects release)	macro
connectome_human_vandenheuvel899885	82	1244	Van Den Heuvel (2015)	link	Tractography-based connectivity matrix constructed from the T1 and diffusion weighted imaging data of the Human Connectome Project (WU-Minn HCP Data - 1200 Subjects release)	macro
connectome_human_vandenheuvel901038	82	1010	Van Den Heuvel (2015)	link	Tractography-based connectivity matrix constructed from the T1 and diffusion weighted imaging data of the Human Connectome Project (WU-Minn HCP Data - 1200 Subjects release)	macro
connectome_human_vandenheuvel901139	82	1237	Van Den Heuvel (2015)	link	Tractography-based connectivity matrix constructed from the T1 and diffusion weighted imaging data of the Human Connectome Project (WU-Minn HCP Data - 1200 Subjects release)	macro
connectome_human_vandenheuvel901442	82	1156	Van Den Heuvel (2015)	link	Tractography-based connectivity matrix constructed from the T1 and diffusion weighted imaging data of the Human Connectome Project (WU-Minn HCP Data - 1200 Subjects release)	macro
connectome_human_vandenheuvel904044	82	1264	Van Den Heuvel (2015)	link	Tractography-based connectivity matrix constructed from the T1 and diffusion weighted imaging data of the Human Connectome Project (WU-Minn HCP Data - 1200 Subjects release)	macro
connectome_human_vandenheuvel907656	82	1107	Van Den Heuvel (2015)	link	Tractography-based connectivity matrix constructed from the T1 and diffusion weighted imaging data of the Human Connectome Project (WU-Minn HCP Data - 1200 Subjects release)	macro
connectome_human_vandenheuvel910241	82	1090	Van Den Heuvel (2015)	link	Tractography-based connectivity matrix constructed from the T1 and diffusion weighted imaging data of the Human Connectome Project (WU-Minn HCP Data - 1200 Subjects release)	macro
connectome_human_vandenheuvel912447	82	1111	Van Den Heuvel (2015)	link	Tractography-based connectivity matrix constructed from the T1 and diffusion weighted imaging data of the Human Connectome Project (WU-Minn HCP Data - 1200 Subjects release)	macro
connectome_human_vandenheuvel917255	82	1156	Van Den Heuvel (2015)	link	Tractography-based connectivity matrix constructed from the T1 and diffusion weighted imaging data of the Human Connectome Project (WU-Minn HCP Data - 1200 Subjects release)	macro
connectome_human_vandenheuvel922854	82	1317	Van Den Heuvel (2015)	link	Tractography-based connectivity matrix constructed from the T1 and diffusion weighted imaging data of the Human Connectome Project (WU-Minn HCP Data - 1200 Subjects release)	macro
connectome_human_vandenheuvel930449	82	1139	Van Den Heuvel (2015)	link	Tractography-based connectivity matrix constructed from the T1 and diffusion weighted imaging data of the Human Connectome Project (WU-Minn HCP Data - 1200 Subjects release)	macro
connectome_human_vandenheuvel932554	82	1319	Van Den Heuvel (2015)	link	Tractography-based connectivity matrix constructed from the T1 and diffusion weighted imaging data of the Human Connectome Project (WU-Minn HCP Data - 1200 Subjects release)	macro
connectome_human_vandenheuvel937160	82	1185	Van Den Heuvel (2015)	link	Tractography-based connectivity matrix constructed from the T1 and diffusion weighted imaging data of the Human Connectome Project (WU-Minn HCP Data - 1200 Subjects release)	macro
connectome_human_vandenheuvel951457	82	1188	Van Den Heuvel (2015)	link	Tractography-based connectivity matrix constructed from the T1 and diffusion weighted imaging data of the Human Connectome Project (WU-Minn HCP Data - 1200 Subjects release)	macro
connectome_human_vandenheuvel957974	82	1236	Van Den Heuvel (2015)	link	Tractography-based connectivity matrix constructed from the T1 and diffusion weighted imaging data of the Human Connectome Project (WU-Minn HCP Data - 1200 Subjects release)	macro
connectome_human_vandenheuvel958976	82	1199	Van Den Heuvel (2015)	link	Tractography-based connectivity matrix constructed from the T1 and diffusion weighted imaging data of the Human Connectome Project (WU-Minn HCP Data - 1200 Subjects release)	macro
connectome_human_vandenheuvel959574	82	1213	Van Den Heuvel (2015)	link	Tractography-based connectivity matrix constructed from the T1 and diffusion weighted imaging data of the Human Connectome Project (WU-Minn HCP Data - 1200 Subjects release)	macro
connectome_human_vandenheuvel965367	82	1173	Van Den Heuvel (2015)	link	Tractography-based connectivity matrix constructed from the T1 and diffusion weighted imaging data of the Human Connectome Project (WU-Minn HCP Data - 1200 Subjects release)	macro
connectome_human_vandenheuvel965771	82	1246	Van Den Heuvel (2015)	link	Tractography-based connectivity matrix constructed from the T1 and diffusion weighted imaging data of the Human Connectome Project (WU-Minn HCP Data - 1200 Subjects release)	macro
connectome_human_vandenheuvel978578	82	1201	Van Den Heuvel (2015)	link	Tractography-based connectivity matrix constructed from the T1 and diffusion weighted imaging data of the Human Connectome Project (WU-Minn HCP Data - 1200 Subjects release)	macro
connectome_human_vandenheuvel979984	82	1115	Van Den Heuvel (2015)	link	Tractography-based connectivity matrix constructed from the T1 and diffusion weighted imaging data of the Human Connectome Project (WU-Minn HCP Data - 1200 Subjects release)	macro
connectome_human_vandenheuvel983773	82	1224	Van Den Heuvel (2015)	link	Tractography-based connectivity matrix constructed from the T1 and diffusion weighted imaging data of the Human Connectome Project (WU-Minn HCP Data - 1200 Subjects release)	macro
connectome_human_vandenheuvel984472	82	1191	Van Den Heuvel (2015)	link	Tractography-based connectivity matrix constructed from the T1 and diffusion weighted imaging data of the Human Connectome Project (WU-Minn HCP Data - 1200 Subjects release)	macro
connectome_human_vandenheuvel987983	82	1187	Van Den Heuvel (2015)	link	Tractography-based connectivity matrix constructed from the T1 and diffusion weighted imaging data of the Human Connectome Project (WU-Minn HCP Data - 1200 Subjects release)	macro
connectome_human_vandenheuvel991267	82	1352	Van Den Heuvel (2015)	link	Tractography-based connectivity matrix constructed from the T1 and diffusion weighted imaging data of the Human Connectome Project (WU-Minn HCP Data - 1200 Subjects release)	macro
connectome_human_vandenheuvel992774	82	1100	Van Den Heuvel (2015)	link	Tractography-based connectivity matrix constructed from the T1 and diffusion weighted imaging data of the Human Connectome Project (WU-Minn HCP Data - 1200 Subjects release)	macro
connectome_human_vandenheuvel994273	82	1161	Van Den Heuvel (2015)	link	Tractography-based connectivity matrix constructed from the T1 and diffusion weighted imaging data of the Human Connectome Project (WU-Minn HCP Data - 1200 Subjects release)	macro
connectome_macaque_honey	47	313	Honey (2007)	link	Mesoscale connectome of macaque neocortex	meso
connectome_macaque_markov1	91	582	Markov (2013)	link	Mesoscale connectome of macaque cortex	meso
connectome_macaque_markov2	93	2262	Markov (2013)	link	Mesoscale connectome of macaque cortex	meso
connectome_macaque_markov3	91	1401	Markov (2014)	link	Mesoscale connectome of macaque cortex	meso
connectome_macaque_young	71	438	Young (1993)	link	Mesoscale connectome of macaque cortex	meso
connectome_macaqueneural_costa	94	1515	Costa (2007)	link	Mesoscale connectome of macaque cortex	meso
connectome_macaqueneural_harriger	242	3054	Harriger (2012)	link	Mesoscale connectome of macaque cortex	meso
connectome_marmoset	116	2727	Majka (2016)	link	Mesoscale connectome of marmoset cortex	meso
connectome_mouse_oh	213	2644	Oh (2014)	link	Mesoscale connectome of mouse whole brain	meso
connectome_mouseneural	18	37	Bock (2011)	link	Microscale connectome of mouse visual cortex	micro
connectome_mouseneural2	29	44	Bock (2011)	link	Microscale connectome of mouse visual cortex	micro
connectome_mouseneural3	193	214	Bock (2011)	link	Microscale connectome of mouse visual cortex	micro
connectome_mouseretina	1076	89991	Helmstaedter (2013)	link	Microscale connectome of mouse retina	micro
connectome_rat1	503	23030	Bota (2012)	link	Macroscale connectome of rat nervous system	macro
connectome_rat2	502	24647	Bota (2012)	link	Macroscale connectome of rat nervous system	macro
connectome_rat3	493	25979	Bota (2012)	link	Macroscale connectome of rat nervous system	macro
connectome_songbirdsynaptic	582	2210	Dorkenwald (2017)	link	Microscale connectome of songbird basal ganglia	micro
connectome_songbirdsynaptic2	610	15342	Dorkenwald (2017)	link	Microscale connectome of songbird basal ganglia	micro
connectome_wormchem	279	1961	Varshney (2011)	link	Chemical synapse network of C. elegans neurons.	micro
connectome_wormconnectome_kaiser	277	1918	Kaiser (2006)	link	Global connectome of C. elegans	micro
connectome_wormconnectome_varshney	279	2287	Varshney (2011)	link	C.elegans connectome	micro
connectome_wormgap	248	511	Varshney (2011)	link	Gap junction network of C.elegans neurons.	micro
connectome_wormnervoussys	297	2148	Watts (1998)	link	C. Elegans connectome representing synaptic interactions between neurons	micro
connectome_wormrostral	131	687	Kaiser (2006)	link	Rostral ganglia (anterior, dorsal, lateral, and ring) synaptic interactions in C.elegans.	micro
connectome_wormsynaptic	54	141	Bumbarger (2013)	link	Synaptic connectivity network of the Pristionchus pacificus.	micro
connectome_wormwiring_male_nervoussys_all	495	5004	Cook (2019)	link	Worm wiring connectome, nervous system, chemical and electrical interactions	micro
connectome_wormwiring_male_nervoussys_chem	487	4146	Cook (2019)	link	Worm wiring connectome, nervous system, chemical interactions	micro
connectome_wormwiring_male_nervoussys_elec	458	1522	Cook (2019)	link	Worm wiring connectome, nervous system, electrical interactions	micro
connectome_wormwiring_male_pharynx_all	51	235	Cook (2019)	link	Worm wiring connectome, pharynx, chemical and electrical interactions	micro
connectome_wormwiring_male_pharynx_chem	39	171	Cook (2019)	link	Worm wiring connectome, pharynx, chemical interactions	micro
connectome_wormwiring_male_pharynx_elec	51	108	Cook (2019)	link	Worm wiring connectome, pharynx, electrical interactions	micro
connectome_wormwiring_male_sensoryinter_all	81	849	Cook (2019)	link	Worm wiring connectome, sensory, chemical and electrical interactions	micro
connectome_wormwiring_male_sensoryinter_chem	81	771	Cook (2019)	link	Worm wiring connectome, sensory, chemical interactions	micro
connectome_wormwiring_male_sensoryinter_elec	78	290	Cook (2019)	link	Worm wiring connectome, sensory, electrical interactions	micro
connectome_wormwiring_male_ventralcordinter_all	36	146	Cook (2019)	link	Worm wiring connectome, ventral cord, chemical and electrical interactions	micro
connectome_wormwiring_male_ventralcordinter_chem	35	107	Cook (2019)	link	Worm wiring connectome, ventral cord, chemical interactions	micro
connectome_wormwiring_male_ventralcordinter_elec	36	89	Cook (2019)	link	Worm wiring connectome, ventral cord, electrical interactions	micro

## Sheet: covert
name	N	E	first author (year)	reference	description
covert_corruptionCzech	13	50	unpublished	link	The data comes from a Czech media database called Newton Media Search and involves all major Czech newspapers for the period from 4th June 2013 to 4th June 2014. The ties are co-appearances – every time an actor was mentioned in one article together with any other actor, it is considered to be a tie.
covert_deliquentsNetherland1999_school1_year3	30	68	Houtzager (1999)	link	This data set is about the evolution of a friendship network and delinquent behavior of pupils in school classes, collected in the Dutch Social Behavior study, a two-wave survey in classrooms (Houtzager and Baerveldt, 1999). These data are from classrooms of the MAVO track, the lower middle level of the Dutch secondary school system, in which the pupils filled in a questionnaire in the 3d and 4th…
covert_deliquentsNetherland1999_school1_year4	36	94	Houtzager (1999)	link	This data set is about the evolution of a friendship network and delinquent behavior of pupils in school classes, collected in the Dutch Social Behavior study, a two-wave survey in classrooms (Houtzager and Baerveldt, 1999). These data are from classrooms of the MAVO track, the lower middle level of the Dutch secondary school system, in which the pupils filled in a questionnaire in the 3d and 4th…
covert_deliquentsNetherland1999_school10_year3	26	38	Houtzager (1999)	link	This data set is about the evolution of a friendship network and delinquent behavior of pupils in school classes, collected in the Dutch Social Behavior study, a two-wave survey in classrooms (Houtzager and Baerveldt, 1999). These data are from classrooms of the MAVO track, the lower middle level of the Dutch secondary school system, in which the pupils filled in a questionnaire in the 3d and 4th…
covert_deliquentsNetherland1999_school10_year4	29	59	Houtzager (1999)	link	This data set is about the evolution of a friendship network and delinquent behavior of pupils in school classes, collected in the Dutch Social Behavior study, a two-wave survey in classrooms (Houtzager and Baerveldt, 1999). These data are from classrooms of the MAVO track, the lower middle level of the Dutch secondary school system, in which the pupils filled in a questionnaire in the 3d and 4th…
covert_deliquentsNetherland1999_school11_year3	42	61	Houtzager (1999)	link	This data set is about the evolution of a friendship network and delinquent behavior of pupils in school classes, collected in the Dutch Social Behavior study, a two-wave survey in classrooms (Houtzager and Baerveldt, 1999). These data are from classrooms of the MAVO track, the lower middle level of the Dutch secondary school system, in which the pupils filled in a questionnaire in the 3d and 4th…
covert_deliquentsNetherland1999_school11_year4	62	104	Houtzager (1999)	link	This data set is about the evolution of a friendship network and delinquent behavior of pupils in school classes, collected in the Dutch Social Behavior study, a two-wave survey in classrooms (Houtzager and Baerveldt, 1999). These data are from classrooms of the MAVO track, the lower middle level of the Dutch secondary school system, in which the pupils filled in a questionnaire in the 3d and 4th…
covert_deliquentsNetherland1999_school13_year3	19	20	Houtzager (1999)	link	This data set is about the evolution of a friendship network and delinquent behavior of pupils in school classes, collected in the Dutch Social Behavior study, a two-wave survey in classrooms (Houtzager and Baerveldt, 1999). These data are from classrooms of the MAVO track, the lower middle level of the Dutch secondary school system, in which the pupils filled in a questionnaire in the 3d and 4th…
covert_deliquentsNetherland1999_school13_year4	21	28	Houtzager (1999)	link	This data set is about the evolution of a friendship network and delinquent behavior of pupils in school classes, collected in the Dutch Social Behavior study, a two-wave survey in classrooms (Houtzager and Baerveldt, 1999). These data are from classrooms of the MAVO track, the lower middle level of the Dutch secondary school system, in which the pupils filled in a questionnaire in the 3d and 4th…
covert_deliquentsNetherland1999_school14_year3	56	115	Houtzager (1999)	link	This data set is about the evolution of a friendship network and delinquent behavior of pupils in school classes, collected in the Dutch Social Behavior study, a two-wave survey in classrooms (Houtzager and Baerveldt, 1999). These data are from classrooms of the MAVO track, the lower middle level of the Dutch secondary school system, in which the pupils filled in a questionnaire in the 3d and 4th…
covert_deliquentsNetherland1999_school14_year4	84	219	Houtzager (1999)	link	This data set is about the evolution of a friendship network and delinquent behavior of pupils in school classes, collected in the Dutch Social Behavior study, a two-wave survey in classrooms (Houtzager and Baerveldt, 1999). These data are from classrooms of the MAVO track, the lower middle level of the Dutch secondary school system, in which the pupils filled in a questionnaire in the 3d and 4th…
covert_deliquentsNetherland1999_school15_year3	31	48	Houtzager (1999)	link	This data set is about the evolution of a friendship network and delinquent behavior of pupils in school classes, collected in the Dutch Social Behavior study, a two-wave survey in classrooms (Houtzager and Baerveldt, 1999). These data are from classrooms of the MAVO track, the lower middle level of the Dutch secondary school system, in which the pupils filled in a questionnaire in the 3d and 4th…
covert_deliquentsNetherland1999_school15_year4	54	88	Houtzager (1999)	link	This data set is about the evolution of a friendship network and delinquent behavior of pupils in school classes, collected in the Dutch Social Behavior study, a two-wave survey in classrooms (Houtzager and Baerveldt, 1999). These data are from classrooms of the MAVO track, the lower middle level of the Dutch secondary school system, in which the pupils filled in a questionnaire in the 3d and 4th…
covert_deliquentsNetherland1999_school16_year3	23	35	Houtzager (1999)	link	This data set is about the evolution of a friendship network and delinquent behavior of pupils in school classes, collected in the Dutch Social Behavior study, a two-wave survey in classrooms (Houtzager and Baerveldt, 1999). These data are from classrooms of the MAVO track, the lower middle level of the Dutch secondary school system, in which the pupils filled in a questionnaire in the 3d and 4th…
covert_deliquentsNetherland1999_school16_year4	31	46	Houtzager (1999)	link	This data set is about the evolution of a friendship network and delinquent behavior of pupils in school classes, collected in the Dutch Social Behavior study, a two-wave survey in classrooms (Houtzager and Baerveldt, 1999). These data are from classrooms of the MAVO track, the lower middle level of the Dutch secondary school system, in which the pupils filled in a questionnaire in the 3d and 4th…
covert_deliquentsNetherland1999_school18_year3	26	41	Houtzager (1999)	link	This data set is about the evolution of a friendship network and delinquent behavior of pupils in school classes, collected in the Dutch Social Behavior study, a two-wave survey in classrooms (Houtzager and Baerveldt, 1999). These data are from classrooms of the MAVO track, the lower middle level of the Dutch secondary school system, in which the pupils filled in a questionnaire in the 3d and 4th…
covert_deliquentsNetherland1999_school18_year4	16	24	Houtzager (1999)	link	This data set is about the evolution of a friendship network and delinquent behavior of pupils in school classes, collected in the Dutch Social Behavior study, a two-wave survey in classrooms (Houtzager and Baerveldt, 1999). These data are from classrooms of the MAVO track, the lower middle level of the Dutch secondary school system, in which the pupils filled in a questionnaire in the 3d and 4th…
covert_deliquentsNetherland1999_school19_year3	33	65	Houtzager (1999)	link	This data set is about the evolution of a friendship network and delinquent behavior of pupils in school classes, collected in the Dutch Social Behavior study, a two-wave survey in classrooms (Houtzager and Baerveldt, 1999). These data are from classrooms of the MAVO track, the lower middle level of the Dutch secondary school system, in which the pupils filled in a questionnaire in the 3d and 4th…
covert_deliquentsNetherland1999_school19_year4	41	79	Houtzager (1999)	link	This data set is about the evolution of a friendship network and delinquent behavior of pupils in school classes, collected in the Dutch Social Behavior study, a two-wave survey in classrooms (Houtzager and Baerveldt, 1999). These data are from classrooms of the MAVO track, the lower middle level of the Dutch secondary school system, in which the pupils filled in a questionnaire in the 3d and 4th…
covert_deliquentsNetherland1999_school20_year3	19	26	Houtzager (1999)	link	This data set is about the evolution of a friendship network and delinquent behavior of pupils in school classes, collected in the Dutch Social Behavior study, a two-wave survey in classrooms (Houtzager and Baerveldt, 1999). These data are from classrooms of the MAVO track, the lower middle level of the Dutch secondary school system, in which the pupils filled in a questionnaire in the 3d and 4th…
covert_deliquentsNetherland1999_school20_year4	27	42	Houtzager (1999)	link	This data set is about the evolution of a friendship network and delinquent behavior of pupils in school classes, collected in the Dutch Social Behavior study, a two-wave survey in classrooms (Houtzager and Baerveldt, 1999). These data are from classrooms of the MAVO track, the lower middle level of the Dutch secondary school system, in which the pupils filled in a questionnaire in the 3d and 4th…
covert_deliquentsNetherland1999_school21_year3	32	51	Houtzager (1999)	link	This data set is about the evolution of a friendship network and delinquent behavior of pupils in school classes, collected in the Dutch Social Behavior study, a two-wave survey in classrooms (Houtzager and Baerveldt, 1999). These data are from classrooms of the MAVO track, the lower middle level of the Dutch secondary school system, in which the pupils filled in a questionnaire in the 3d and 4th…
covert_deliquentsNetherland1999_school21_year4	48	82	Houtzager (1999)	link	This data set is about the evolution of a friendship network and delinquent behavior of pupils in school classes, collected in the Dutch Social Behavior study, a two-wave survey in classrooms (Houtzager and Baerveldt, 1999). These data are from classrooms of the MAVO track, the lower middle level of the Dutch secondary school system, in which the pupils filled in a questionnaire in the 3d and 4th…
covert_deliquentsNetherland1999_school22_year3	39	61	Houtzager (1999)	link	This data set is about the evolution of a friendship network and delinquent behavior of pupils in school classes, collected in the Dutch Social Behavior study, a two-wave survey in classrooms (Houtzager and Baerveldt, 1999). These data are from classrooms of the MAVO track, the lower middle level of the Dutch secondary school system, in which the pupils filled in a questionnaire in the 3d and 4th…
covert_deliquentsNetherland1999_school22_year4	51	84	Houtzager (1999)	link	This data set is about the evolution of a friendship network and delinquent behavior of pupils in school classes, collected in the Dutch Social Behavior study, a two-wave survey in classrooms (Houtzager and Baerveldt, 1999). These data are from classrooms of the MAVO track, the lower middle level of the Dutch secondary school system, in which the pupils filled in a questionnaire in the 3d and 4th…
covert_deliquentsNetherland1999_school23_year3	43	73	Houtzager (1999)	link	This data set is about the evolution of a friendship network and delinquent behavior of pupils in school classes, collected in the Dutch Social Behavior study, a two-wave survey in classrooms (Houtzager and Baerveldt, 1999). These data are from classrooms of the MAVO track, the lower middle level of the Dutch secondary school system, in which the pupils filled in a questionnaire in the 3d and 4th…
covert_deliquentsNetherland1999_school23_year4	57	114	Houtzager (1999)	link	This data set is about the evolution of a friendship network and delinquent behavior of pupils in school classes, collected in the Dutch Social Behavior study, a two-wave survey in classrooms (Houtzager and Baerveldt, 1999). These data are from classrooms of the MAVO track, the lower middle level of the Dutch secondary school system, in which the pupils filled in a questionnaire in the 3d and 4th…
covert_deliquentsNetherland1999_school3_year3	14	13	Houtzager (1999)	link	This data set is about the evolution of a friendship network and delinquent behavior of pupils in school classes, collected in the Dutch Social Behavior study, a two-wave survey in classrooms (Houtzager and Baerveldt, 1999). These data are from classrooms of the MAVO track, the lower middle level of the Dutch secondary school system, in which the pupils filled in a questionnaire in the 3d and 4th…
covert_deliquentsNetherland1999_school3_year4	24	43	Houtzager (1999)	link	This data set is about the evolution of a friendship network and delinquent behavior of pupils in school classes, collected in the Dutch Social Behavior study, a two-wave survey in classrooms (Houtzager and Baerveldt, 1999). These data are from classrooms of the MAVO track, the lower middle level of the Dutch secondary school system, in which the pupils filled in a questionnaire in the 3d and 4th…
covert_deliquentsNetherland1999_school4_year3	14	18	Houtzager (1999)	link	This data set is about the evolution of a friendship network and delinquent behavior of pupils in school classes, collected in the Dutch Social Behavior study, a two-wave survey in classrooms (Houtzager and Baerveldt, 1999). These data are from classrooms of the MAVO track, the lower middle level of the Dutch secondary school system, in which the pupils filled in a questionnaire in the 3d and 4th…
covert_deliquentsNetherland1999_school4_year4	14	15	Houtzager (1999)	link	This data set is about the evolution of a friendship network and delinquent behavior of pupils in school classes, collected in the Dutch Social Behavior study, a two-wave survey in classrooms (Houtzager and Baerveldt, 1999). These data are from classrooms of the MAVO track, the lower middle level of the Dutch secondary school system, in which the pupils filled in a questionnaire in the 3d and 4th…
covert_deliquentsNetherland1999_school6_year3	27	41	Houtzager (1999)	link	This data set is about the evolution of a friendship network and delinquent behavior of pupils in school classes, collected in the Dutch Social Behavior study, a two-wave survey in classrooms (Houtzager and Baerveldt, 1999). These data are from classrooms of the MAVO track, the lower middle level of the Dutch secondary school system, in which the pupils filled in a questionnaire in the 3d and 4th…
covert_deliquentsNetherland1999_school6_year4	30	65	Houtzager (1999)	link	This data set is about the evolution of a friendship network and delinquent behavior of pupils in school classes, collected in the Dutch Social Behavior study, a two-wave survey in classrooms (Houtzager and Baerveldt, 1999). These data are from classrooms of the MAVO track, the lower middle level of the Dutch secondary school system, in which the pupils filled in a questionnaire in the 3d and 4th…
covert_deliquentsNetherland1999_school7_year3	51	84	Houtzager (1999)	link	This data set is about the evolution of a friendship network and delinquent behavior of pupils in school classes, collected in the Dutch Social Behavior study, a two-wave survey in classrooms (Houtzager and Baerveldt, 1999). These data are from classrooms of the MAVO track, the lower middle level of the Dutch secondary school system, in which the pupils filled in a questionnaire in the 3d and 4th…
covert_deliquentsNetherland1999_school7_year4	45	103	Houtzager (1999)	link	This data set is about the evolution of a friendship network and delinquent behavior of pupils in school classes, collected in the Dutch Social Behavior study, a two-wave survey in classrooms (Houtzager and Baerveldt, 1999). These data are from classrooms of the MAVO track, the lower middle level of the Dutch secondary school system, in which the pupils filled in a questionnaire in the 3d and 4th…
covert_deliquentsNetherland1999_school8_year3	76	135	Houtzager (1999)	link	This data set is about the evolution of a friendship network and delinquent behavior of pupils in school classes, collected in the Dutch Social Behavior study, a two-wave survey in classrooms (Houtzager and Baerveldt, 1999). These data are from classrooms of the MAVO track, the lower middle level of the Dutch secondary school system, in which the pupils filled in a questionnaire in the 3d and 4th…
covert_deliquentsNetherland1999_school8_year4	80	156	Houtzager (1999)	link	This data set is about the evolution of a friendship network and delinquent behavior of pupils in school classes, collected in the Dutch Social Behavior study, a two-wave survey in classrooms (Houtzager and Baerveldt, 1999). These data are from classrooms of the MAVO track, the lower middle level of the Dutch secondary school system, in which the pupils filled in a questionnaire in the 3d and 4th…
covert_deliquentsNetherland1999_school9_year3	40	70	Houtzager (1999)	link	This data set is about the evolution of a friendship network and delinquent behavior of pupils in school classes, collected in the Dutch Social Behavior study, a two-wave survey in classrooms (Houtzager and Baerveldt, 1999). These data are from classrooms of the MAVO track, the lower middle level of the Dutch secondary school system, in which the pupils filled in a questionnaire in the 3d and 4th…
covert_deliquentsNetherland1999_school9_year4	39	71	Houtzager (1999)	link	This data set is about the evolution of a friendship network and delinquent behavior of pupils in school classes, collected in the Dutch Social Behavior study, a two-wave survey in classrooms (Houtzager and Baerveldt, 1999). These data are from classrooms of the MAVO track, the lower middle level of the Dutch secondary school system, in which the pupils filled in a questionnaire in the 3d and 4th…
covert_druggangEuropol	1554	2216	Mainas (2012)	link	Network data were phone records collected in a period of a week in November 2007 during a police investigation against a drug trafficking group, which was involved in the commission of other serious crimes (thefts, robberies and violent acts against the police). The researcher obtained permission to use this coded data set from the Analysis Unit of the Hellenic Police.
covert_drugMontreal1996	110	205	Morselli (2009)	link	Project Caviar was a unique investigation that targeted a network of hashish and cocaine importers operating out of Montreal. The network was targeted between 1994 and 1996 by a tandem investigation uniting the Montreal Police, the Royal Canadian Mounted Police, and other national and regional law-enforcement agencies from various countries (i.e., England, Spain, Italy, Brazil, Paraguay, and Colo…
covert_drugMontreal1997	25	35	Morselli (2009)	link	Project Ciel is based on a small drug-importation network that was importing liquid hashish from Jamaica to Montreal. This network was targeted by the Royal Canadian Mounted Police and the Montreal Police from May 1996 to June 1997. Typical of many Canadian investigations of drug smuggling and trafficking, the operations in Project Ciel were described as taking place within a tightly governed org…
covert_drugnewyorkcity	28	40	Natarajan (2000)	link	This dataset comes from an investigation into to a large cocaine trafficking organization in New York City.
covert_drugnewyorkcity1990s	38	87	Natarajan (2006)	link	This dataset comes from an investigation into a large heroin trafficking organization in New York City in the 1990s.
covert_drugSpainACERO	25	37	Framis (2011)	link	Data refers to four groups involved in cocaine trafficking in Spain. Information comes from police wiretapping and meetings registered by police investigations of these criminal organisations between 2007 and 2009. This investigation started in 2007 and involved a smaller family-based group. The group was composed mainly of members of a same family and was led by a female. They distributed cocain…
covert_drugSpainJAKE	38	50	Framis (2011)	link	Data refers to four groups involved in cocaine trafficking in Spain. Information comes from police wiretapping and meetings registered by police investigations of these criminal organisations between 2007 and 2009. Operation JAKE (N=62). In 2008, the group investigated was operating as a wholesale supplier and retail distributor of cocaine and heroin in a large distribution zone located in Madrid…
covert_drugSpainJUANES	51	93	Framis (2011)	link	Data refers to four groups involved in cocaine trafficking in Spain. Information comes from police wiretapping and meetings registered by police investigations of these criminal organisations between 2007 and 2009. Operation JUANES (N=51). In 2009, the police investigation detected a group involved in the smuggling of cocaine from Mexico to be distributed in Madrid (Spain). In this case, the grou…
covert_drugSpainMAMBO	31	58	Framis (2011)	link	Data refers to four groups involved in cocaine trafficking in Spain. Information comes from police wiretapping and meetings registered by police investigations of these criminal organisations between 2007 and 2009. Operation MAMBO (N=22). The investigation started in 2006 and involved Colombian citizens that were introducing 50 kg of cocaine to be adulterated and distributed in Madrid (Spain). Ul…
covert_drugToronto1998	33	47	Morselli (2009)	link	Project Togo began in February 1998 when a Toronto-based ringing operation was dismantled and one of its participants informed the police that he was previously employed by a Montreal businessman who was also active in the resale of stolen vehicles. This initial tip was corroborated soon after by a thief who had been arrested while driving a stolen vehicle. By December 1998, the Togo investigatio…
covert_drugusersHartford	193	273	unpublished	link	This is a dichotomous adjacency matrix of drug users in Hartford. Ties are directed and represent acquaintanceship. The network is a result of two years of ethnographic observations of people's drug habits.
covert_FIFA2015	414	4805	unpublished	link	Networs of Standing Committee membership. This is a covert network with covert elements. Reconstructed by Gemma Edwards from Select Committee 2006 activity report.
covert_financialMadoff	61	60	unpublished	link	Bernie Madoff was involved in a massive financial fraud in the USA and was sentenced to 150 years in prison (http://en.wikipedia.org/wiki/Bernard_Madoff). The network is finance flows between financial institutions and Madoff’s firm. All data for this network was gathered from news stories and court documents found on major media web sites. Read more about the social network underpinnings of this…
covert_gangItaly	65	113	unpublished	link	Describes Italian gang members and their nationalities. No further contextual data available.
covert_gangLondon2009	54	315	Grund (2012)	link	Data is on co-offending in a London-based inner-city street gang, 2005-2009, operating from a social housing estate. Data comes from anonymised police arrest and conviction data for ‘all confirmed’ members of the gang.
covert_gangMontreal2007	29	75	Descormiers (2011)	link	Data obtained from the Montreal Police’s central intelligence base, the Automated Criminal Intelligence Information System (ACIIS), was used to reconstruct the organization of drug-distribution operations in Montreal North. These operations were targeted during three separate investigations between 2004 and 2007 by the Montreal Police, who believed that the criminal activities were under the cont…
covert_relationshipislamicstategroup	25	27	unpublished	link	The data describes relationships (friends and kinships) between members of the Islamic State supplied to the BBC by IS investigation team. Reconstructed from http://www.bbc.co.uk/news/world-middle-east-29052475
covert_relationsPIRA1998	45	64	Gill (2014)	link	Data is on active Provisional IRA (hereafter PIRA) members between 1970 and 1998. Data collected at the International Center for the Study of Terrorism, Pennsylvania State University. From this data are derived network structures and the nature of dependence within them. The PIRA network comprises the following four types of relationships: (1) involvement in a PIRA activity together, (2) friends …
covert_shipment1998	44	103	Morselli (2009)	link	Project Siren began in February 1998 when a port worker informed members of the CERVO group that a container of stolen vehicles had been recently shipped to Ghana. This shipment was subsequently seized at its transit point in Anvers, Belgium. This initial tip and action led to a close monitoring of the suspects involved in the shipment. The investigation continued for 4 months (to June 1998), dur…
covert_steroidbaseball	45	947			When the Mitchell Report [no relation], on steroid use in Major League Baseball [MLB], was published people were surprised at both the number and names of those who were mentioned. The diagram below shows a network map created from data found in the Mitchell Report. Baseball players are shown as green nodes. Those who were found to be providers of steroids and other illegal performance enhancing …
hyperlink_terroristgroupsUS	32	49	Zhou (2005)	link	Network of hyperlinks between domestic terrorist group websites in the United States
terrorist_AlQaeda2003_lcc1	125	312	Sageman (2004)	link	The Al Qaeda Operations Attack Series is data that pools the relations of individuals associated with over 10 attacks and individually depicts them for each event. It is not a time series but instead an aggregate attack series best perceived as the variously composed attack teams deployed by Al Qaeda over a decade. From 1993 to 2003
terrorist_AlQaeda2003_lcc2	35	74	Sageman (2004)	link	The Al Qaeda Operations Attack Series is data that pools the relations of individuals associated with over 10 attacks and individually depicts them for each event. It is not a time series but instead an aggregate attack series best perceived as the variously composed attack teams deployed by Al Qaeda over a decade. From 1993 to 2003
terrorist_AlQaeda2003_lcc3	29	109	Sageman (2004)	link	The Al Qaeda Operations Attack Series is data that pools the relations of individuals associated with over 10 attacks and individually depicts them for each event. It is not a time series but instead an aggregate attack series best perceived as the variously composed attack teams deployed by Al Qaeda over a decade. From 1993 to 2003
terrorist_AlQaeda2003_lcc4	21	78	Sageman (2004)	link	The Al Qaeda Operations Attack Series is data that pools the relations of individuals associated with over 10 attacks and individually depicts them for each event. It is not a time series but instead an aggregate attack series best perceived as the variously composed attack teams deployed by Al Qaeda over a decade. From 1993 to 2003
terrorist_AlQaeda2003_lcc5	19	77	Sageman (2004)	link	The Al Qaeda Operations Attack Series is data that pools the relations of individuals associated with over 10 attacks and individually depicts them for each event. It is not a time series but instead an aggregate attack series best perceived as the variously composed attack teams deployed by Al Qaeda over a decade. From 1993 to 2003
terrorist_attacksHamburg2006	32	121	unpublished	link	This is a time series that treat specific attacks as endpoints and depict the evolution of relations between individuals indirectly and directly associated with the sleeper Al Qaeda cell in Hamburg around the time of the 9/11 bombings
terrorist_attacksParis2015	77	273	Gutfraind (2017)	link	Network of associations among individuals identified to be involved in with 13 November 2015 terrorist attacks in Paris, France
terrorist_attackUSA20010911	62	152	Krebs (2002)	link	Attack of September 11, 2001, USA
terrorist_bombingBali2002	27	158	unpublished	link	This is a time series that treat specific attacks as endpoints and depict the evolution of relations between individuals indirectly and directly associated with the 2002 Bali bombing by Jemaah Islamayah.
terrorist_bombingBali2005	27	102	unpublished	link	This is a time series that treat specific attacks as endpoints and depict the evolution of relations between individuals indirectly and directly associated with the 2005 Bali bombing by Jemaah Islamayah
terrorist_bombingGreece2002	18	46	unpublished	link	The dataset refers to the 17 November Revolutionary Organixation, a Marxist urban guerrilla organization operating in Greece. The data refers to the specific temporal window which runs from 1975 to 2002. During these years the group has been responsible for several violent acts such as assassinations, kidnappings and symbolic attacks on government offices.
terrorist_bombingIndonesia2000	45	234	unpublished	link	This is a time series that treat specific attacks as endpoints and depict the evolution of relations between individuals indirectly and directly associated with the 2000 Christmas Eve bombing
terrorist_bombingIndonesia2004	27	112	unpublished	link	This is a time series that treat specific attacks as endpoints and depict the evolution of relations between individuals indirectly and directly associated with the Australian Embassy bombing
terrorist_bombingJakarta2009	15	23	unpublished	link	This is a time series that treat specific attacks as endpoints and depict the evolution of relations between individuals indirectly and directly associated with the 2009 Jakarta bombing
terrorist_bombingMadrid2004	54	226	unpublished	link	This is a time series that treat specific attacks as endpoints and depict the evolution of relations between individuals indirectly and directly associated with the Madrid train bombing.
terrorist_bombingPhilippines2007	16	69	unpublished	link	This is a time series that treat specific attacks as endpoints and depict the evolution of relations between individuals indirectly and directly associated with the Philippines bombing. From 2000 to 2007
terrorist_bombingrelationGreece2002	22	66	Rhodes (2009)	link	Data is a social network of the (believed defunct) Greek terrorist group November17 (N17) that was derived from open source reporting (Irwin et al, 2002; Abram and Smith, 2004).
terrorist_bombingWTC2011	61	131	Krebs (2002)	link	Famous dataset of the terrorists involved in the 9/11 bombing of the World Trade Centres in 2011. Data was extracted from news reports and ties range from ‘at school with’ to ‘on same plane’.
terrorist_colocalizationattacks	51	1178	unpublished	link	These are two datasets about a set of terrorists and the attacks they carry out collected by the MIND Lab at University of Maryland (UMD) (http://www.mindswap.org/). Ties are co-location of terrorist attacks.
terrorist_jeemahislamiyahcellBali2002	17	63	Koschade (2006)	link	Jemaah Islamiyah cell that was responsible for the Bali bombings in 2002 – i.e. should tally with the other Bali bombing dataset from JJATT. The recording of the interaction of the cell began following the meeting in the Hotel Harem in Denpasar on October 6, when the group was considered to go ‘operationally covert’, and concluded when the majority of the group had left Bali before the implementa…
terrorist_organizationsIndia2001	25	64	Saxena (2004)	link	Data is organisation-to-organisation links of terrorist organisations operating in the Indian State of Jammu & Kashmir. 2001
terrorist_relationshipEuropol	4085	6358	Mainas (2012)	link	person-by-person links collected over a period of years in the framework of an ongoing intelligence operation against terrorism in the EU (source: Europol).
terrorist_relationshipIndonesia2006	78	623	Nancy (2011)	link	These data were drawn primarily from "Terrorism in Indonesia: Noordin's Networks," a publication of the International Crisis Group (2006) and include relational data on the 79 individuals listed in Appendix C of that publication. The data were initially coded by Naval Postgraduate School students as part of the course “Tracking and Disrupting Dark Networks” under the direction of Professor Sean E…
terrorist_relationshipSahel2012	36	67	Walther (2015)	link	Data refers to a terrorist network operating in the Sahel Sahel-Sahara region and describes relationships between Islamists and Tuareg rebels during the Malian conflict. Data comes from a selection of newspaper articles published between 2010 and 2012. Relations derived from interactions, including participation in political or military event, political meetings; trainings in Afghanistan, Iraq, o…
terrorist_relationsSEAsia2005	108	565		link	The Southeast Asian Aggregate Attack Series collapses all of the individual, Indonesian cases into a single series of relations useful for inspecting a series of behavioural and compositional changes in one terrorist network. Up to 2005.
terrorist_suicideattacks2003	16	25	Acosta (2013)	link	Data is on militant organizations between 1985 and 2006. Each node signifies a militant organization or other type of entity that conducts suicide attacks. 1-mode matrix for each year, organization by organization. Undirected, binary ties represent a known physical relationship between agents from different but “connected” organizations.
terrorist_suicideattacks2004	15	29	Acosta (2013)	link	Data is on militant organizations between 1985 and 2006. Each node signifies a militant organization or other type of entity that conducts suicide attacks. 1-mode matrix for each year, organization by organization. Undirected, binary ties represent a known physical relationship between agents from different but “connected” organizations.
terrorist_suicideattacks2005	16	27	Acosta (2013)	link	Data is on militant organizations between 1985 and 2006. Each node signifies a militant organization or other type of entity that conducts suicide attacks. 1-mode matrix for each year, organization by organization. Undirected, binary ties represent a known physical relationship between agents from different but “connected” organizations.
terrorist_suicideattacks2006	17	28	Acosta (2013)	link	Data is on militant organizations between 1985 and 2006. Each node signifies a militant organization or other type of entity that conducts suicide attacks. 1-mode matrix for each year, organization by organization. Undirected, binary ties represent a known physical relationship between agents from different but “connected” organizations.

## Sheet: foodweb
name	N	E	first author (year)	reference
foodweb_akatoreA	84	227	Thompson (1998) Thompson (1999) Thompson (2000) Thompson (2001) Thompson (2003)	link
foodweb_akatoreB	54	117
foodweb_berwick	77	240
foodweb_blackrock	86	375
foodweb_broad	94	564
foodweb_canton	109	717
foodweb_catlins	48	110
foodweb_coweeta1	58	126
foodweb_coweeta17	71	148
foodweb_dempstersAu	83	414
foodweb_dempstersSp	93	538
foodweb_dempstersSu	107	965
foodweb_german	84	352
foodweb_healy	96	634
foodweb_kyeburn	98	629
foodweb_lilKyeburn	78	375
foodweb_martins	105	343
foodweb_narrowdale	71	154
foodweb_northCol	78	241
foodweb_powder	78	268
foodweb_stony	112	830
foodweb_suttonAu	80	335
foodweb_suttonSp	74	391
foodweb_suttonSu	87	424
foodweb_troy	77	181
foodweb_venlaw	66	187
foodweb_bahiafalsaFree	119	1062	Dunne (2013)	link
foodweb_bahiafalsaPar	171	2190
foodweb_bahiafalsaParCon	171	3027
foodweb_carpinteriaFree	107	935
foodweb_carpinteriaPar	165	2123
foodweb_carpinteriaParCon	165	3057
foodweb_esterodepuntaFree	138	1595
foodweb_esterodepuntaPar	214	3241
foodweb_esterodepuntaParCon	214	4927
foodweb_flensburgFree	77	577
foodweb_flensburgPar	123	963
foodweb_flensburgParCon	123	1273
foodweb_otagoFree	123	1174
foodweb_otagoPar	142	1454
foodweb_otagoParCon	142	1686
foodweb_sylttidalFree	126	1044
foodweb_sylttidalPar	161	1939
foodweb_sylttidalParCon	161	2577
foodweb_ythanFree	91	415
foodweb_ythanPar	133	592
foodweb_ythanParCon	133	1274
foodweb_chesapeake	39	170	Baird (1989)	link
foodweb_crystal	24	114	Ulanowicz (1986)	link
foodweb_cypresswet	71	612	Ulanowicz (1997)	link
foodweb_everglades	69	880	Ulanowicz (2000)	link
foodweb_florida	128	2075	Ulanowicz (1998)	link
foodweb_mangrovewet	97	1446	Ulanowicz (1997)	link
foodweb_maspalomas	24	77	Almunia (1999)	link
foodweb_michigan	39	209	unpublished	link
foodweb_mondego	46	358	unpublished	link
foodweb_narragansett	35	204	Monaco (1997)	link
foodweb_rhode	19	45	unpublished	link
foodweb_stmarks	54	350	Baird (1998)	link
foodweb_sanakIntertidal	235	1743	Dunne (2016)	link
foodweb_sanakNearshore	513	6613
foodweb_tuesday1984	50	263	Cohen (2009)	link
foodweb_tuesday1986	51	233
foodweb_silwood	153	365	unpublished	link
foodweb_stmartin	45	224
foodweb_grassweb	75	113	Dawah (1995)	link
foodweb_carpinteria2	128	1834	Lafferty (2006)	link
foodweb_otago2	180	1856	Mouritsen (2011)	link
foodweb_flensburg2	180	1567	Zander (2011)	link
foodweb_littlerock	183	2434	Martinez (1991)	link
foodweb_messel	700	6395	Dunne (2014)	link

## Sheet: infrastructure
name	N	E	first author (year)	reference	description
flightmap_europeAegeanAirlines	38	53	Cardillo (2013)	link	European flightmap of the company: SunExpress
flightmap_europeaggregated	417	2953	Cardillo (2013)	link	European flightmap of the companies: Lufthansa, Ryanair, Easyjet, BritishAirways, TurkishAirlines, AirBerlin, AirFrance, ScandinavianAirlines, KLM, Alitalia, SwissInternationalAirLines, Iberia, NorwegianAirShuttle, AustrianAirlines, Flybe, WizzAir, TAPPortugal, BrusselsAirlines, Finnair, LOTPolishAirlines, VuelingAirlines, AirNostrum, AirLingus, Germanwings, PanagraAirways, Netjets, TransaviaHoll…
flightmap_europeAirBaltic	45	45	Cardillo (2013)	link	European flightmap of the company: MalevHungarianAirlines
flightmap_europeAirBerlin	75	184	Cardillo (2013)	link	European flightmap of the company: TurkishAirlines
flightmap_europeAirFrance	59	69	Cardillo (2013)	link	European flightmap of the company: AirBerlin
flightmap_europeAirLingus	45	58	Cardillo (2013)	link	European flightmap of the company: AirNostrum
flightmap_europeAirNostrum	48	69	Cardillo (2013)	link	European flightmap of the company: VuelingAirlines
flightmap_europeAlitalia	51	93	Cardillo (2013)	link	European flightmap of the company: KLM
flightmap_europeAustrianAirlines	67	72	Cardillo (2013)	link	European flightmap of the company: NorwegianAirShuttle
flightmap_europeBritishAirways	63	65	Cardillo (2013)	link	European flightmap of the company: Easyjet
flightmap_europeBrusselsAirlines	44	43	Cardillo (2013)	link	European flightmap of the company: TAPPortugal
flightmap_europeCzechAirlines	42	41	Cardillo (2013)	link	European flightmap of the company: AegeanAirlines
flightmap_europeEasyjet	99	307	Cardillo (2013)	link	European flightmap of the company: Ryanair
flightmap_europeEuropeanAirTransport	53	73	Cardillo (2013)	link	European flightmap of the company: CzechAirlines
flightmap_europeFinnair	42	42	Cardillo (2013)	link	European flightmap of the company: BrusselsAirlines
flightmap_europeFlybe	43	99	Cardillo (2013)	link	European flightmap of the company: AustrianAirlines
flightmap_europeGermanwings	42	66	Cardillo (2013)	link	European flightmap of the company: AirLingus
flightmap_europeIberia	35	35	Cardillo (2013)	link	European flightmap of the company: SwissInternationalAirLines
flightmap_europeKLM	63	62	Cardillo (2013)	link	European flightmap of the company: ScandinavianAirlines
flightmap_europeLOTPolishAirlines	44	55	Cardillo (2013)	link	European flightmap of the company: Finnair
flightmap_europeLufthansa	106	244	Cardillo (2013)	link	The multilayer network is composed by thirty-seven different layers each one corresponding to a different airline operating in Europe
flightmap_europeMalevHungarianAirlines	35	34	Cardillo (2013)	link	European flightmap of the company: EuropeanAirTransport
flightmap_europeNetjets	90	178	Cardillo (2013)	link	European flightmap of the company: PanagraAirways
flightmap_europeNiki	36	37	Cardillo (2013)	link	European flightmap of the company: TransaviaHolland
flightmap_europeNorwegianAirShuttle	52	87	Cardillo (2013)	link	European flightmap of the company: Iberia
flightmap_europeOlympicAir	37	43	Cardillo (2013)	link	European flightmap of the company: TNTAirways
flightmap_europePanagraAirways	45	58	Cardillo (2013)	link	European flightmap of the company: Germanwings
flightmap_europeRyanair	128	601	Cardillo (2013)	link	European flightmap of the company: Lufthansa
flightmap_europeScandinavianAirlines	66	110	Cardillo (2013)	link	European flightmap of the company: AirFrance
flightmap_europeSunExpress	38	67	Cardillo (2013)	link	European flightmap of the company: Niki
flightmap_europeSwissInternationalAirLines	48	60	Cardillo (2013)	link	European flightmap of the company: Alitalia
flightmap_europeTAPPortugal	42	53	Cardillo (2013)	link	European flightmap of the company: WizzAir
flightmap_europeTNTAirways	53	61	Cardillo (2013)	link	European flightmap of the company: Wideroe
flightmap_europeTransaviaHolland	40	57	Cardillo (2013)	link	European flightmap of the company: Netjets
flightmap_europeTurkishAirlines	86	118	Cardillo (2013)	link	European flightmap of the company: BritishAirways
flightmap_europeVuelingAirlines	36	63	Cardillo (2013)	link	European flightmap of the company: LOTPolishAirlines
flightmap_europeWideroe	45	90	Cardillo (2013)	link	European flightmap of the company: AirBaltic
flightmap_europeWizzAir	45	92	Cardillo (2013)	link	European flightmap of the company: Flybe
flightmap_nonUSopenflight	2905	15645	unpublished	link	Ties between two non-US-based airports, source is openflights.org
flightmap_openflight2012	3397	19230	unpublished	link	These are flights collected by the OpenFlights.org project. Each node is an airport, and an edge represents one flight by one airline (2012).
flightmap_UK2010	57	211	Gallotti (2015)	link	Flightmap of one week time from 18/10/2010 to 24/10/2010 within UK.
flightmap_US1997	332	2126	unpublished	link	Network of air flights in USA as it was in 1997
flightmap_US2010	1572	17214	unpublished	link	Flights network between US airports in 2010. Each edge represents a connection from one airport to another.
flightmap_USAFAApreferred	1226	2408	unpublished	link	This network was constructed from the USA's FAA (Federal Aviation Administration) National Flight Data Center (NFDC), Preferred Routes Database. Nodes in this network represent airports or service centers and links are created from strings of preferred routes recommended by the NFDC.
flightmap_USCanada	456	37947	Frey (2007)	link	Network of flights between American and Canadian cities
flightmap_UStop500	500	2980	Colizza (2007)	link	500 US airports with the largest amount of traffic publicly available
nauticalmap_UK2010ferries	23	35	Gallotti (2015)	link	Nautical map of ferries transportation of one week time from 18/10/2010 to 24/10/2010 within UK.
powergrid_USwest	4941	6594	Watts (1998)	link	Power Grid of the Western States of the USA
railmap_northamerica2017	247987	286991	unpublished	link	The Rail Network is a comprehensive database of North America's railway system as of 10/10/2017. The data set covers all 50 States plus the District of Columbia.
railmap_UK2010	2490	4377	Gallotti (2015)	link	Railmap of one week time from 18/10/2010 to 24/10/2010 within UK.
railmap_US2017	195387	223211	unpublished	link	The Rail Lines dataset as of 19/05/2017. The dataset is part of the U.S. Department of Transportation (USDOT)/Bureau of Transportation Statistics's (BTS's) National Transportation Atlas Database (NTAD). The Railroad Network is a comprehensive database of the nation's railway system. The dataset covers all 50 States plus the District of Columbia.
railroadmap_amtrak2017	12759	12918	unpublished	link	The Amtrak Routes dataset as of 19/05/2017. Amtrak is a passenger railroad service that provides medium- and long-distance intercity service in the contiguous United States and to three Canadian cities. The dataset is part of the U.S. Department of Transportation (USDOT)/Bureau of Transportation Statistics's (BTS's) National Transportation Atlas Database (NTAD).
roadmap_anaheim1992	416	634	Roth (2012)	link	Anaheim network for 1992 provided by Jeff Ban and Ray Jayakrishnan
roadmap_austin2005	7388	10591	Roth (2012)	link	Austin network for 2005 provided by Chi Xie.
roadmap_barcelona	930	1798	Roth (2012)	link	Barcelona network.
roadmap_belgium2010	1441295	1549970	Kobitzsch (2010)	link	Belgium roadmap network in 2010. The data were acquired from the Open Street Map road networks.
roadmap_berlincenter	12981	21470	Jahn (2005)	link	Network of Berlin-Center. Provided by Rolf Möhring (TU Berlin) Andreas Schulz (MIT), and Nicolas Stier-Moses (Columbia University) with the assistance of Stefan Gnutzmann (DaimlerChrysler).
roadmap_berlincenterfriedrichshain	224	376	Jahn (2005)	link	Network of Berlin-Friedrichshain. Provided by Rolf Möhring (TU Berlin) Andreas Schulz (MIT), and Nicolas Stier-Moses (Columbia University) with the assistance of Stefan Gnutzmann (DaimlerChrysler).
roadmap_berlinmittecenter	397	644	Jahn (2005)	link	Network of Berlin-Mitte-Center. Provided by Rolf Möhring (TU Berlin) Andreas Schulz (MIT), and Nicolas Stier-Moses (Columbia University) with the assistance of Stefan Gnutzmann (DaimlerChrysler).
roadmap_berlinmitteprenzlauerbergfriedrichshaincenter	974	1611	Jahn (2005)	link	Network of Berlin-Mitte-Prenzlauerberg-Friedrichshain-Center. Provided by Rolf Möhring (TU Berlin) Andreas Schulz (MIT), and Nicolas Stier-Moses (Columbia University) with the assistance of Stefan Gnutzmann (DaimlerChrysler).
roadmap_berlinprenzlauerbergcenter	350	553	Jahn (2005)	link	Network of Berlin-Prenzlauerberg-Center. Provided by Rolf Möhring (TU Berlin) Andreas Schulz (MIT), and Nicolas Stier-Moses (Columbia University) with the assistance of Stefan Gnutzmann (DaimlerChrysler).
roadmap_berlintiergarten	357	515	Jahn (2005)	link	Network of Berlin-Tiergarten. Provided by Rolf Möhring (TU Berlin) Andreas Schulz (MIT), and Nicolas Stier-Moses (Columbia University) with the assistance of Stefan Gnutzmann (DaimlerChrysler).
roadmap_birmingham	14578	20913	Roth (2012)	link	Network of Birmingham-England. Access to the dataset has been kindly provided with the assistance of Tom van Vuren (Mott MacDonald) and Klaus Noekel (PTV).
roadmap_california2005	21048	21693	Feifei (2005)	link	Road map between cities in California, USA
roadmap_california2009	1957027	2760388	Leskovec (2009)	link	Road map of California, USA. Nodes are both cities and road intersections
roadmap_californianevada	1890815	2315222	unpublished	link	California and Nevada (USA) roadmap network.
roadmap_chicago	933	1475	Roth (2012)	link	A fairly realistic yet aggregated representation of the Chicago region. Developed and provided by the Chicago Area Transportation Study
roadmap_chicago1983	12979	20627	Eash (1983)	link	A large-scale, detailed representation of the Chicago region. Developed and provided by the Chicago Area Transportation Study (CATS)
roadmap_chicagotransportation	823	822	Eash (1993)	link	Road transportation network of the Chicago region (USA). Nodes are transport nodes, and edges are connections.
roadmap_colorado	435666	521200	unpublished		Colorado (USA) roadmap network.
roadmap_easternmassachusetts	74	129	Zhang (2016)	link	This is a highway subnetwork extracted from the entire Eastern Massachusetts network.
roadmap_EUroad	1039	1305	Šubelj (2011)	link	International E-road network, a road network located mostly in Europe. Nodes represent cities and an edge between two nodes denotes that they are connected by an E-road.
roadmap_florida	1070376	1343951	unpublished		Florida (USA) roadmap network.
roadmap_freightsUS2017	150713	568030	unpublished	link	The Freight Analysis Framework Network (FAF) dataset as of 20/03/2017; it is part of the U.S. Department of Transportation (USDOT)/Bureau of Transportation Statistics's (BTS's) National Transportation Atlas Database (NTAD). The dataset contains state primary and secondary roads, National Highway System (NHS), National Network (NN) and several intermodal connectors as appropriate for the freight n…
roadmap_germanhighway	1168	1243	Kaiser (2004)	link	German highway system
roadmap_GreatLakes	2758119	3397404	unpublished		Great Lakes (USA) roadmap network.
roadmap_hessen	4660	6026	Roth (2012)	link	Network of Hessen. Provided by Esteve Codina Sancho, Universitat Politècnica de Catalunya
roadmap_highwaysUS2017	55695	126640	unpublished	link	The National Highway Planning Network (NHPN) dataset is part of the U.S. Department of Transportation (USDOT)/Bureau of Transportation Statistics's (BTS's) National Transportation Atlas Database (NTAD). The NHPN is a Geographical Information System (GIS) database that contains line features representing over 450,000 miles of current and planned highways in the United States as of 05/2014, includi…
roadmap_luxemburg2010	114599	119666	unpublished		Luxemburg roadmap network in 2010. The data were acquired from the Open Street Map road networks.
roadmap_minnesota2010	2640	3302	unpublished	link	Minnesota roadmap network in 2010.
roadmap_netherlands2010	2216688	2441238	unpublished		Netherlands roadmap network in 2010. The data were acquired from the Open Street Map road networks.
roadmap_newyorkcity	264346	365050	unpublished		New York City (USA) roadmap network.
roadmap_northamerica	130854	133773	unpublished	link	Road map of North America
roadmap_oldenburg	6105	7029	Brinkhoff (2002)	link	Road map of Oldenburg, Germany
roadmap_pennsylvania	1087562	1541514	Leskovec (2009)	link	Road map of Pennsylvania, USA
roadmap_philadelphia	13389	21246	Roth (2012)	link	A large-scale network for the Delaware Valley Region. Provided by Dr. W. Thomas Walker, Manager, Office of Corridor/Systems Planning, Delaware Valley Regional Planning Commission, Philadelphia, PA.
roadmap_rome1999	3353	4831	unpublished		Rome (Italy) roadmap network in 1999.
roadmap_sanfrancisco	174956	221802	Brinkhoff (2002)	link	Road map of San Francisco, California
roadmap_sanfranciscobayarea	321270	397415	unpublished		San Francisco Bay Area (USA) roadmap network.
roadmap_sanjoaquin	18263	23797	Brinkhoff (2002)	link	Road map of San Joaquin County, California
roadmap_terrassa	1618	2234	Roth (2012)	link	Network of Terrassa, provided by Esteve Codina Sancho, Universitat Politècnica de Catalunya
roadmap_texas	1351137	1879201	unpublished	link	Road map of Texas, USA
roadmap_UK2010buses	259870	383806	Gallotti (2015)	link	Roadmap of buses transportation of one week time from 18/10/2010 to 24/10/2010 within UK.
roadmap_UK2010coaches	1567	2340	Gallotti (2015)	link	Roadmap of coaches transportation of one week time from 18/10/2010 to 24/10/2010 within UK.
roadmap_USAeast	3598623	4354029	unpublished	link	Eastern USA roadmap network.
roadmap_USAnortheast	1524453	1934010	unpublished	link	Northeast USA roadmap network.
roadmap_USAnorthwest	1207945	1410387	unpublished	link	Northwest USA roadmap network.
roadmap_UScontinental2010	126146	161950	unpublished	link	Continental US roadmap network in 2010.
roadmap_USstateAK	48560	55014	unpublished	link	Roadmap network of the US State: AK
roadmap_USstateAL	561459	649895	unpublished	link	Roadmap network of the US State: AL
roadmap_USstateAR	478024	551355	unpublished	link	Roadmap network of the US State: AR
roadmap_USstateAZ	533008	651299	unpublished	link	Roadmap network of the US State: AZ
roadmap_USstateCA	1595577	1959581	unpublished	link	Roadmap network of the US State: CA
roadmap_USstateCO	436084	521572	unpublished	link	Roadmap network of the US State: CO
roadmap_USstateCT	152036	184393	unpublished	link	Roadmap network of the US State: CT
roadmap_USstateDC	9522	14807	unpublished	link	Roadmap network of the District of Columbia (DC)
roadmap_USstateDE	48812	59502	unpublished	link	Roadmap network of the US State: DE
roadmap_USstateFL	1036647	1302913	unpublished	link	Roadmap network of the US State: FL
roadmap_USstateGA	731954	852705	unpublished	link	Roadmap network of the US State: GA
roadmap_USstateHI	21774	26007	unpublished	link	Roadmap network of the US State: HI
roadmap_USstateIA	388487	490373	unpublished	link	Roadmap network of the US State: IA
roadmap_USstateID	265552	310684	unpublished	link	Roadmap network of the US State: ID
roadmap_USstateIL	790439	994527	unpublished	link	Roadmap network of the US State: IL
roadmap_USstateIN	495581	616987	unpublished	link	Roadmap network of the US State: IN
roadmap_USstateKS	471066	590811	unpublished	link	Roadmap network of the US State: KS
roadmap_USstateKY	463542	517387	unpublished	link	Roadmap network of the US State: KY
roadmap_USstateLA	408161	489985	unpublished	link	Roadmap network of the US State: LA
roadmap_USstateMA	294345	365937	unpublished	link	Roadmap network of the US State: MA
roadmap_USstateMD	264378	312977	unpublished	link	Roadmap network of the US State: MD
roadmap_USstateME	187315	206176	unpublished	link	Roadmap network of the US State: ME
roadmap_USstateMI	661718	820127	unpublished	link	Roadmap network of the US State: MI
roadmap_USstateMN	541166	654501	unpublished	link	Roadmap network of the US State: MN
roadmap_USstateMO	668322	790740	unpublished	link	Roadmap network of the US State: MO
roadmap_USstateMS	409994	474124	unpublished	link	Roadmap network of the US State: MS
roadmap_USstateMT	300809	343444	unpublished	link	Roadmap network of the US State: MT
roadmap_USstateNC	876954	991585	unpublished	link	Roadmap network of the US State: NC
roadmap_USstateND	203583	249809	unpublished	link	Roadmap network of the US State: ND
roadmap_USstateNE	304335	380004	unpublished	link	Roadmap network of the US State: NE
roadmap_USstateNH	115055	130197	unpublished	link	Roadmap network of the US State: NH
roadmap_USstateNJ	329404	430730	unpublished	link	Roadmap network of the US State: NJ
roadmap_USstateNM	456896	552352	unpublished	link	Roadmap network of the US State: NM
roadmap_USstateNV	253012	302133	unpublished	link	Roadmap network of the US State: NV
roadmap_USstateNY	708520	881589	unpublished	link	Roadmap network of the US State: NY
roadmap_USstateOH	672527	829228	unpublished	link	Roadmap network of the US State: OH
roadmap_USstateOK	535032	648151	unpublished	link	Roadmap network of the US State: OK
roadmap_USstateOR	529702	617445	unpublished	link	Roadmap network of the US State: OR
roadmap_USstatePA	866352	1072638	unpublished	link	Roadmap network of the US State: PA
roadmap_USstateRI	51642	66650	unpublished	link	Roadmap network of the US State: RI
roadmap_USstateSC	460763	543635	unpublished	link	Roadmap network of the US State: SC
roadmap_USstateSD	206998	249828	unpublished	link	Roadmap network of the US State: SD
roadmap_USstateTN	578981	664757	unpublished	link	Roadmap network of the US State: TN
roadmap_USstateTX	2037156	2530640	unpublished	link	Roadmap network of the US State: TX
roadmap_USstateUT	242432	288368	unpublished	link	Roadmap network of the US State: UT
roadmap_USstateVA	620680	698306	unpublished	link	Roadmap network of the US State: VA
roadmap_USstateVT	95672	104644	unpublished	link	Roadmap network of the US State: VT
roadmap_USstateWA	560336	655553	unpublished	link	Roadmap network of the US State: WA
roadmap_USstateWI	514687	621325	unpublished	link	Roadmap network of the US State: WI
roadmap_USstateWV	292557	320708	unpublished	link	Roadmap network of the US State: WV
roadmap_USstateWY	243545	293825	unpublished	link	Roadmap network of the US State: WY
roadmap_winnipeg1	949	1823	Roth (2012)	link	Network of Winnipeg, provided by Esteve Codina Sancho, Universitat Politècnica de Catalunya
roadmap_winnipeg2	1040	1595	Roth (2012)	link	Network of Winnipeg
subwaymap_barcelona2009	128	143	Roth (2012)	link	Network of subway systems of Barcelona (2009). Nodes are subway stations and edges connecting them are subway lines.
subwaymap_beijing2009	104	114	Roth (2012)	link	Network of subway systems of Barcelona (2009). Nodes are subway stations and edges connecting them are subway lines.
subwaymap_berlin2009	170	182	Roth (2012)	link	Network of subway systems of Barcelona (2009). Nodes are subway stations and edges connecting them are subway lines.
subwaymap_chicago2009	141	149	Roth (2012)	link	Network of subway systems of Barcelona (2009). Nodes are subway stations and edges connecting them are subway lines.
subwaymap_hongkong2009	82	85	Roth (2012)	link	Network of subway systems of Barcelona (2009). Nodes are subway stations and edges connecting them are subway lines.
subwaymap_london2009	266	308	Roth (2012)	link	Network of subway systems of Barcelona (2009). Nodes are subway stations and edges connecting them are subway lines.
subwaymap_madrid2009	209	240	Roth (2012)	link	Network of subway systems of Barcelona (2009). Nodes are subway stations and edges connecting them are subway lines.
subwaymap_mexico2009	147	164	Roth (2012)	link	Network of subway systems of Barcelona (2009). Nodes are subway stations and edges connecting them are subway lines.
subwaymap_moscow2009	134	156	Roth (2012)	link	Network of subway systems of Barcelona (2009). Nodes are subway stations and edges connecting them are subway lines.
subwaymap_newyork2009	433	475	Roth (2012)	link	Network of subway systems of Barcelona (2009). Nodes are subway stations and edges connecting them are subway lines.
subwaymap_osaka2009	108	123	Roth (2012)	link	Network of subway systems of Barcelona (2009). Nodes are subway stations and edges connecting them are subway lines.
subwaymap_paris2009	299	356	Roth (2012)	link	Network of subway systems of Barcelona (2009). Nodes are subway stations and edges connecting them are subway lines.
subwaymap_seoul2009	392	437	Roth (2012)	link	Network of subway systems of Barcelona (2009). Nodes are subway stations and edges connecting them are subway lines.
subwaymap_shanghai2009	148	158	Roth (2012)	link	Network of subway systems of Barcelona (2009). Nodes are subway stations and edges connecting them are subway lines.
subwaymap_tokyo2009	217	262	Roth (2012)	link	Network of subway systems of Barcelona (2009). Nodes are subway stations and edges connecting them are subway lines.
subwaymap_UK2010	307	358	Gallotti (2015)	link	Subwaymap of one week time from 18/10/2010 to 24/10/2010 within UK.
trade_FAOaggregated2010	183	945	De Domenico (2015)	link	Trade relationships network of 339 foods amoung countries, obtained from FAO (Food and Agriculture Organization of the United Nations) in 2010. The worldwide food import/export network is an economic network in which nodes are countries and edges at each layer represent import/export relationships of a specific food product among countries.
trade_FAOAlmondsshelled2010	24	35	De Domenico (2015)	link	Trade relationships network of Almonds_shelled amoung countries, obtained from FAO (Food and Agriculture Organization of the United Nations) in 2010. The worldwide food import/export network is an economic network in which nodes are countries and edges at each layer represent import/export relationships of a specific food product among countries.
trade_FAOAnisebadianfennelcoriander2010	45	76	De Domenico (2015)	link	Trade relationships network of Anise_badian_fennel_coriander amoung countries, obtained from FAO (Food and Agriculture Organization of the United Nations) in 2010. The worldwide food import/export network is an economic network in which nodes are countries and edges at each layer represent import/export relationships of a specific food product among countries.
trade_FAOApples2010	28	30	De Domenico (2015)	link	Trade relationships network of Apples amoung countries, obtained from FAO (Food and Agriculture Organization of the United Nations) in 2010. The worldwide food import/export network is an economic network in which nodes are countries and edges at each layer represent import/export relationships of a specific food product among countries.
trade_FAOApricotsdry2010	23	26	De Domenico (2015)	link	Trade relationships network of Apricots_dry amoung countries, obtained from FAO (Food and Agriculture Organization of the United Nations) in 2010. The worldwide food import/export network is an economic network in which nodes are countries and edges at each layer represent import/export relationships of a specific food product among countries.
trade_FAOAsparagus2010	24	25	De Domenico (2015)	link	Trade relationships network of Asparagus amoung countries, obtained from FAO (Food and Agriculture Organization of the United Nations) in 2010. The worldwide food import/export network is an economic network in which nodes are countries and edges at each layer represent import/export relationships of a specific food product among countries.
trade_FAOBaconandham2010	23	31	De Domenico (2015)	link	Trade relationships network of Bacon_and_ham amoung countries, obtained from FAO (Food and Agriculture Organization of the United Nations) in 2010. The worldwide food import/export network is an economic network in which nodes are countries and edges at each layer represent import/export relationships of a specific food product among countries.
trade_FAOBananas2010	40	45	De Domenico (2015)	link	Trade relationships network of Bananas amoung countries, obtained from FAO (Food and Agriculture Organization of the United Nations) in 2010. The worldwide food import/export network is an economic network in which nodes are countries and edges at each layer represent import/export relationships of a specific food product among countries.
trade_FAOBarley2010	25	28	De Domenico (2015)	link	Trade relationships network of Barley amoung countries, obtained from FAO (Food and Agriculture Organization of the United Nations) in 2010. The worldwide food import/export network is an economic network in which nodes are countries and edges at each layer represent import/export relationships of a specific food product among countries.
trade_FAOBeansdry2010	44	67	De Domenico (2015)	link	Trade relationships network of Beans_dry amoung countries, obtained from FAO (Food and Agriculture Organization of the United Nations) in 2010. The worldwide food import/export network is an economic network in which nodes are countries and edges at each layer represent import/export relationships of a specific food product among countries.
trade_FAOBeansgreen2010	25	27	De Domenico (2015)	link	Trade relationships network of Beans_green amoung countries, obtained from FAO (Food and Agriculture Organization of the United Nations) in 2010. The worldwide food import/export network is an economic network in which nodes are countries and edges at each layer represent import/export relationships of a specific food product among countries.
trade_FAOBeerofbarley2010	85	142	De Domenico (2015)	link	Trade relationships network of Beer_of_barley amoung countries, obtained from FAO (Food and Agriculture Organization of the United Nations) in 2010. The worldwide food import/export network is an economic network in which nodes are countries and edges at each layer represent import/export relationships of a specific food product among countries.
trade_FAOBeveragesdistilledalcoholic2010	88	212	De Domenico (2015)	link	Trade relationships network of Beverages_distilled_alcoholic amoung countries, obtained from FAO (Food and Agriculture Organization of the United Nations) in 2010. The worldwide food import/export network is an economic network in which nodes are countries and edges at each layer represent import/export relationships of a specific food product among countries.
trade_FAOBeveragesnonalcoholic2010	89	218	De Domenico (2015)	link	Trade relationships network of Beverages_non_alcoholic amoung countries, obtained from FAO (Food and Agriculture Organization of the United Nations) in 2010. The worldwide food import/export network is an economic network in which nodes are countries and edges at each layer represent import/export relationships of a specific food product among countries.
trade_FAOBread2010	61	93	De Domenico (2015)	link	Trade relationships network of Bread amoung countries, obtained from FAO (Food and Agriculture Organization of the United Nations) in 2010. The worldwide food import/export network is an economic network in which nodes are countries and edges at each layer represent import/export relationships of a specific food product among countries.
trade_FAOButtercowmilk2010	33	50	De Domenico (2015)	link	Trade relationships network of Butter_cow_milk amoung countries, obtained from FAO (Food and Agriculture Organization of the United Nations) in 2010. The worldwide food import/export network is an economic network in which nodes are countries and edges at each layer represent import/export relationships of a specific food product among countries.
trade_FAOButtermilkcurdledacidifiedmilk2010	40	42	De Domenico (2015)	link	Trade relationships network of Buttermilk_curdled_acidified_milk amoung countries, obtained from FAO (Food and Agriculture Organization of the United Nations) in 2010. The worldwide food import/export network is an economic network in which nodes are countries and edges at each layer represent import/export relationships of a specific food product among countries.
trade_FAOCabbagesandotherbrassicas2010	22	21	De Domenico (2015)	link	Trade relationships network of Cabbages_and_other_brassicas amoung countries, obtained from FAO (Food and Agriculture Organization of the United Nations) in 2010. The worldwide food import/export network is an economic network in which nodes are countries and edges at each layer represent import/export relationships of a specific food product among countries.
trade_FAOCakesoybeans2010	21	30	De Domenico (2015)	link	Trade relationships network of Cake_soybeans amoung countries, obtained from FAO (Food and Agriculture Organization of the United Nations) in 2010. The worldwide food import/export network is an economic network in which nodes are countries and edges at each layer represent import/export relationships of a specific food product among countries.
trade_FAOCashewnutsshelled2010	22	25	De Domenico (2015)	link	Trade relationships network of Cashew_nuts_shelled amoung countries, obtained from FAO (Food and Agriculture Organization of the United Nations) in 2010. The worldwide food import/export network is an economic network in which nodes are countries and edges at each layer represent import/export relationships of a specific food product among countries.
trade_FAOCattle2010	22	28	De Domenico (2015)	link	Trade relationships network of Cattle amoung countries, obtained from FAO (Food and Agriculture Organization of the United Nations) in 2010. The worldwide food import/export network is an economic network in which nodes are countries and edges at each layer represent import/export relationships of a specific food product among countries.
trade_FAOCerealpreparationsnes2010	41	54	De Domenico (2015)	link	Trade relationships network of Cereal_preparations_nes amoung countries, obtained from FAO (Food and Agriculture Organization of the United Nations) in 2010. The worldwide food import/export network is an economic network in which nodes are countries and edges at each layer represent import/export relationships of a specific food product among countries.
trade_FAOCerealsbreakfast2010	74	130	De Domenico (2015)	link	Trade relationships network of Cereals_breakfast amoung countries, obtained from FAO (Food and Agriculture Organization of the United Nations) in 2010. The worldwide food import/export network is an economic network in which nodes are countries and edges at each layer represent import/export relationships of a specific food product among countries.
trade_FAOCheeseprocessed2010	35	47	De Domenico (2015)	link	Trade relationships network of Cheese_processed amoung countries, obtained from FAO (Food and Agriculture Organization of the United Nations) in 2010. The worldwide food import/export network is an economic network in which nodes are countries and edges at each layer represent import/export relationships of a specific food product among countries.
trade_FAOCheesewholecowmilk2010	56	105	De Domenico (2015)	link	Trade relationships network of Cheese_whole_cow_milk amoung countries, obtained from FAO (Food and Agriculture Organization of the United Nations) in 2010. The worldwide food import/export network is an economic network in which nodes are countries and edges at each layer represent import/export relationships of a specific food product among countries.
trade_FAOChickens2010	24	30	De Domenico (2015)	link	Trade relationships network of Chickens amoung countries, obtained from FAO (Food and Agriculture Organization of the United Nations) in 2010. The worldwide food import/export network is an economic network in which nodes are countries and edges at each layer represent import/export relationships of a specific food product among countries.
trade_FAOChickpeas2010	21	26	De Domenico (2015)	link	Trade relationships network of Chick_peas amoung countries, obtained from FAO (Food and Agriculture Organization of the United Nations) in 2010. The worldwide food import/export network is an economic network in which nodes are countries and edges at each layer represent import/export relationships of a specific food product among countries.
trade_FAOChilliesandpeppersdry2010	54	84	De Domenico (2015)	link	Trade relationships network of Chillies_and_peppers_dry amoung countries, obtained from FAO (Food and Agriculture Organization of the United Nations) in 2010. The worldwide food import/export network is an economic network in which nodes are countries and edges at each layer represent import/export relationships of a specific food product among countries.
trade_FAOChilliesandpeppersgreen2010	31	33	De Domenico (2015)	link	Trade relationships network of Chillies_and_peppers_green amoung countries, obtained from FAO (Food and Agriculture Organization of the United Nations) in 2010. The worldwide food import/export network is an economic network in which nodes are countries and edges at each layer represent import/export relationships of a specific food product among countries.
trade_FAOChocolateproductsnes2010	80	193	De Domenico (2015)	link	Trade relationships network of Chocolate_products_nes amoung countries, obtained from FAO (Food and Agriculture Organization of the United Nations) in 2010. The worldwide food import/export network is an economic network in which nodes are countries and edges at each layer represent import/export relationships of a specific food product among countries.
trade_FAOCideretc2010	38	57	De Domenico (2015)	link	Trade relationships network of Cider_etc amoung countries, obtained from FAO (Food and Agriculture Organization of the United Nations) in 2010. The worldwide food import/export network is an economic network in which nodes are countries and edges at each layer represent import/export relationships of a specific food product among countries.
trade_FAOCigarettes2010	67	109	De Domenico (2015)	link	Trade relationships network of Cigarettes amoung countries, obtained from FAO (Food and Agriculture Organization of the United Nations) in 2010. The worldwide food import/export network is an economic network in which nodes are countries and edges at each layer represent import/export relationships of a specific food product among countries.
trade_FAOCigarscheroots2010	43	85	De Domenico (2015)	link	Trade relationships network of Cigars_cheroots amoung countries, obtained from FAO (Food and Agriculture Organization of the United Nations) in 2010. The worldwide food import/export network is an economic network in which nodes are countries and edges at each layer represent import/export relationships of a specific food product among countries.
trade_FAOCinnamon(canella)2010	35	46	De Domenico (2015)	link	Trade relationships network of Cinnamon_(canella) amoung countries, obtained from FAO (Food and Agriculture Organization of the United Nations) in 2010. The worldwide food import/export network is an economic network in which nodes are countries and edges at each layer represent import/export relationships of a specific food product among countries.
trade_FAOCloves2010	25	30	De Domenico (2015)	link	Trade relationships network of Cloves amoung countries, obtained from FAO (Food and Agriculture Organization of the United Nations) in 2010. The worldwide food import/export network is an economic network in which nodes are countries and edges at each layer represent import/export relationships of a specific food product among countries.
trade_FAOCocoabeans2010	28	34	De Domenico (2015)	link	Trade relationships network of Cocoa_beans amoung countries, obtained from FAO (Food and Agriculture Organization of the United Nations) in 2010. The worldwide food import/export network is an economic network in which nodes are countries and edges at each layer represent import/export relationships of a specific food product among countries.
trade_FAOCocoabutter2010	29	41	De Domenico (2015)	link	Trade relationships network of Cocoa_butter amoung countries, obtained from FAO (Food and Agriculture Organization of the United Nations) in 2010. The worldwide food import/export network is an economic network in which nodes are countries and edges at each layer represent import/export relationships of a specific food product among countries.
trade_FAOCocoapaste2010	24	27	De Domenico (2015)	link	Trade relationships network of Cocoa_paste amoung countries, obtained from FAO (Food and Agriculture Organization of the United Nations) in 2010. The worldwide food import/export network is an economic network in which nodes are countries and edges at each layer represent import/export relationships of a specific food product among countries.
trade_FAOCocoapowderandcake2010	47	78	De Domenico (2015)	link	Trade relationships network of Cocoa_powder_and_cake amoung countries, obtained from FAO (Food and Agriculture Organization of the United Nations) in 2010. The worldwide food import/export network is an economic network in which nodes are countries and edges at each layer represent import/export relationships of a specific food product among countries.
trade_FAOCoconutsdesiccated2010	28	33	De Domenico (2015)	link	Trade relationships network of Coconuts_desiccated amoung countries, obtained from FAO (Food and Agriculture Organization of the United Nations) in 2010. The worldwide food import/export network is an economic network in which nodes are countries and edges at each layer represent import/export relationships of a specific food product among countries.
trade_FAOCoffeeextracts2010	59	112	De Domenico (2015)	link	Trade relationships network of Coffee_extracts amoung countries, obtained from FAO (Food and Agriculture Organization of the United Nations) in 2010. The worldwide food import/export network is an economic network in which nodes are countries and edges at each layer represent import/export relationships of a specific food product among countries.
trade_FAOCoffeegreen2010	70	133	De Domenico (2015)	link	Trade relationships network of Coffee_green amoung countries, obtained from FAO (Food and Agriculture Organization of the United Nations) in 2010. The worldwide food import/export network is an economic network in which nodes are countries and edges at each layer represent import/export relationships of a specific food product among countries.
trade_FAOCoffeeroasted2010	73	110	De Domenico (2015)	link	Trade relationships network of Coffee_roasted amoung countries, obtained from FAO (Food and Agriculture Organization of the United Nations) in 2010. The worldwide food import/export network is an economic network in which nodes are countries and edges at each layer represent import/export relationships of a specific food product among countries.
trade_FAOCoffeesubstitutescontainingcoffee2010	33	36	De Domenico (2015)	link	Trade relationships network of Coffee_substitutes_containing_coffee amoung countries, obtained from FAO (Food and Agriculture Organization of the United Nations) in 2010. The worldwide food import/export network is an economic network in which nodes are countries and edges at each layer represent import/export relationships of a specific food product among countries.
trade_FAOCottonlint2010	22	22	De Domenico (2015)	link	Trade relationships network of Cotton_lint amoung countries, obtained from FAO (Food and Agriculture Organization of the United Nations) in 2010. The worldwide food import/export network is an economic network in which nodes are countries and edges at each layer represent import/export relationships of a specific food product among countries.
trade_FAOCreamfresh2010	36	42	De Domenico (2015)	link	Trade relationships network of Cream_fresh amoung countries, obtained from FAO (Food and Agriculture Organization of the United Nations) in 2010. The worldwide food import/export network is an economic network in which nodes are countries and edges at each layer represent import/export relationships of a specific food product among countries.
trade_FAOCrudematerials2010	121	287	De Domenico (2015)	link	Trade relationships network of Crude_materials amoung countries, obtained from FAO (Food and Agriculture Organization of the United Nations) in 2010. The worldwide food import/export network is an economic network in which nodes are countries and edges at each layer represent import/export relationships of a specific food product among countries.
trade_FAOCucumbersandgherkins2010	20	21	De Domenico (2015)	link	Trade relationships network of Cucumbers_and_gherkins amoung countries, obtained from FAO (Food and Agriculture Organization of the United Nations) in 2010. The worldwide food import/export network is an economic network in which nodes are countries and edges at each layer represent import/export relationships of a specific food product among countries.
trade_FAODates2010	33	46	De Domenico (2015)	link	Trade relationships network of Dates amoung countries, obtained from FAO (Food and Agriculture Organization of the United Nations) in 2010. The worldwide food import/export network is an economic network in which nodes are countries and edges at each layer represent import/export relationships of a specific food product among countries.
trade_FAOEggsheninshell2010	39	42	De Domenico (2015)	link	Trade relationships network of Eggs_hen_in_shell amoung countries, obtained from FAO (Food and Agriculture Organization of the United Nations) in 2010. The worldwide food import/export network is an economic network in which nodes are countries and edges at each layer represent import/export relationships of a specific food product among countries.
trade_FAOFatnesprepared2010	48	74	De Domenico (2015)	link	Trade relationships network of Fat_nes_prepared amoung countries, obtained from FAO (Food and Agriculture Organization of the United Nations) in 2010. The worldwide food import/export network is an economic network in which nodes are countries and edges at each layer represent import/export relationships of a specific food product among countries.
trade_FAOFatpigs2010	22	29	De Domenico (2015)	link	Trade relationships network of Fat_pigs amoung countries, obtained from FAO (Food and Agriculture Organization of the United Nations) in 2010. The worldwide food import/export network is an economic network in which nodes are countries and edges at each layer represent import/export relationships of a specific food product among countries.
trade_FAOFattyacids2010	37	62	De Domenico (2015)	link	Trade relationships network of Fatty_acids amoung countries, obtained from FAO (Food and Agriculture Organization of the United Nations) in 2010. The worldwide food import/export network is an economic network in which nodes are countries and edges at each layer represent import/export relationships of a specific food product among countries.
trade_FAOFeedsupplements2010	24	23	De Domenico (2015)	link	Trade relationships network of Feed_supplements amoung countries, obtained from FAO (Food and Agriculture Organization of the United Nations) in 2010. The worldwide food import/export network is an economic network in which nodes are countries and edges at each layer represent import/export relationships of a specific food product among countries.
trade_FAOFigsdried2010	18	21	De Domenico (2015)	link	Trade relationships network of Figs_dried amoung countries, obtained from FAO (Food and Agriculture Organization of the United Nations) in 2010. The worldwide food import/export network is an economic network in which nodes are countries and edges at each layer represent import/export relationships of a specific food product among countries.
trade_FAOFlourcereals2010	41	49	De Domenico (2015)	link	Trade relationships network of Flour_cereals amoung countries, obtained from FAO (Food and Agriculture Organization of the United Nations) in 2010. The worldwide food import/export network is an economic network in which nodes are countries and edges at each layer represent import/export relationships of a specific food product among countries.
trade_FAOFlourmaize2010	40	44	De Domenico (2015)	link	Trade relationships network of Flour_maize amoung countries, obtained from FAO (Food and Agriculture Organization of the United Nations) in 2010. The worldwide food import/export network is an economic network in which nodes are countries and edges at each layer represent import/export relationships of a specific food product among countries.
trade_FAOFlourmustard2010	41	62	De Domenico (2015)	link	Trade relationships network of Flour_mustard amoung countries, obtained from FAO (Food and Agriculture Organization of the United Nations) in 2010. The worldwide food import/export network is an economic network in which nodes are countries and edges at each layer represent import/export relationships of a specific food product among countries.
trade_FAOFlourpotatoes2010	21	26	De Domenico (2015)	link	Trade relationships network of Flour_potatoes amoung countries, obtained from FAO (Food and Agriculture Organization of the United Nations) in 2010. The worldwide food import/export network is an economic network in which nodes are countries and edges at each layer represent import/export relationships of a specific food product among countries.
trade_FAOFlourwheat2010	54	76	De Domenico (2015)	link	Trade relationships network of Flour_wheat amoung countries, obtained from FAO (Food and Agriculture Organization of the United Nations) in 2010. The worldwide food import/export network is an economic network in which nodes are countries and edges at each layer represent import/export relationships of a specific food product among countries.
trade_FAOFoodpreparationsflourmaltextract2010	65	103	De Domenico (2015)	link	Trade relationships network of Food_preparations_flour_malt_extract amoung countries, obtained from FAO (Food and Agriculture Organization of the United Nations) in 2010. The worldwide food import/export network is an economic network in which nodes are countries and edges at each layer represent import/export relationships of a specific food product among countries.
trade_FAOFoodprepnes2010	120	341	De Domenico (2015)	link	Trade relationships network of Food_prep_nes amoung countries, obtained from FAO (Food and Agriculture Organization of the United Nations) in 2010. The worldwide food import/export network is an economic network in which nodes are countries and edges at each layer represent import/export relationships of a specific food product among countries.
trade_FAOFoodwastes2010	46	74	De Domenico (2015)	link	Trade relationships network of Food_wastes amoung countries, obtained from FAO (Food and Agriculture Organization of the United Nations) in 2010. The worldwide food import/export network is an economic network in which nodes are countries and edges at each layer represent import/export relationships of a specific food product among countries.
trade_FAOFructoseandsyrupother2010	22	22	De Domenico (2015)	link	Trade relationships network of Fructose_and_syrup_other amoung countries, obtained from FAO (Food and Agriculture Organization of the United Nations) in 2010. The worldwide food import/export network is an economic network in which nodes are countries and edges at each layer represent import/export relationships of a specific food product among countries.
trade_FAOFruitcookedhomogenizedpreparations2010	38	49	De Domenico (2015)	link	Trade relationships network of Fruit_cooked_homogenized_preparations amoung countries, obtained from FAO (Food and Agriculture Organization of the United Nations) in 2010. The worldwide food import/export network is an economic network in which nodes are countries and edges at each layer represent import/export relationships of a specific food product among countries.
trade_FAOFruitdriednes2010	54	84	De Domenico (2015)	link	Trade relationships network of Fruit_dried_nes amoung countries, obtained from FAO (Food and Agriculture Organization of the United Nations) in 2010. The worldwide food import/export network is an economic network in which nodes are countries and edges at each layer represent import/export relationships of a specific food product among countries.
trade_FAOFruitfreshnes2010	34	36	De Domenico (2015)	link	Trade relationships network of Fruit_fresh_nes amoung countries, obtained from FAO (Food and Agriculture Organization of the United Nations) in 2010. The worldwide food import/export network is an economic network in which nodes are countries and edges at each layer represent import/export relationships of a specific food product among countries.
trade_FAOFruitpreparednes2010	94	195	De Domenico (2015)	link	Trade relationships network of Fruit_prepared_nes amoung countries, obtained from FAO (Food and Agriculture Organization of the United Nations) in 2010. The worldwide food import/export network is an economic network in which nodes are countries and edges at each layer represent import/export relationships of a specific food product among countries.
trade_FAOGarlic2010	30	37	De Domenico (2015)	link	Trade relationships network of Garlic amoung countries, obtained from FAO (Food and Agriculture Organization of the United Nations) in 2010. The worldwide food import/export network is an economic network in which nodes are countries and edges at each layer represent import/export relationships of a specific food product among countries.
trade_FAOGinger2010	30	39	De Domenico (2015)	link	Trade relationships network of Ginger amoung countries, obtained from FAO (Food and Agriculture Organization of the United Nations) in 2010. The worldwide food import/export network is an economic network in which nodes are countries and edges at each layer represent import/export relationships of a specific food product among countries.
trade_FAOGlucoseanddextrose2010	44	68	De Domenico (2015)	link	Trade relationships network of Glucose_and_dextrose amoung countries, obtained from FAO (Food and Agriculture Organization of the United Nations) in 2010. The worldwide food import/export network is an economic network in which nodes are countries and edges at each layer represent import/export relationships of a specific food product among countries.
trade_FAOGrapefruit2010	26	29	De Domenico (2015)	link	Trade relationships network of Grapefruit_(inc._pomelos) amoung countries, obtained from FAO (Food and Agriculture Organization of the United Nations) in 2010. The worldwide food import/export network is an economic network in which nodes are countries and edges at each layer represent import/export relationships of a specific food product among countries.
trade_FAOGrapes2010	25	31	De Domenico (2015)	link	Trade relationships network of Grapes amoung countries, obtained from FAO (Food and Agriculture Organization of the United Nations) in 2010. The worldwide food import/export network is an economic network in which nodes are countries and edges at each layer represent import/export relationships of a specific food product among countries.
trade_FAOGrease2010	21	22	De Domenico (2015)	link	Trade relationships network of Grease_incl._lanolin_wool amoung countries, obtained from FAO (Food and Agriculture Organization of the United Nations) in 2010. The worldwide food import/export network is an economic network in which nodes are countries and edges at each layer represent import/export relationships of a specific food product among countries.
trade_FAOGroundnutsshelled2010	24	27	De Domenico (2015)	link	Trade relationships network of Groundnuts_shelled amoung countries, obtained from FAO (Food and Agriculture Organization of the United Nations) in 2010. The worldwide food import/export network is an economic network in which nodes are countries and edges at each layer represent import/export relationships of a specific food product among countries.
trade_FAOHazelnutsshelled2010	20	22	De Domenico (2015)	link	Trade relationships network of Hazelnuts_shelled amoung countries, obtained from FAO (Food and Agriculture Organization of the United Nations) in 2010. The worldwide food import/export network is an economic network in which nodes are countries and edges at each layer represent import/export relationships of a specific food product among countries.
trade_FAOHidescattlewetsalted2010	26	25	De Domenico (2015)	link	Trade relationships network of Hides_cattle_wet_salted amoung countries, obtained from FAO (Food and Agriculture Organization of the United Nations) in 2010. The worldwide food import/export network is an economic network in which nodes are countries and edges at each layer represent import/export relationships of a specific food product among countries.
trade_FAOHoneynatural2010	53	78	De Domenico (2015)	link	Trade relationships network of Honey_natural amoung countries, obtained from FAO (Food and Agriculture Organization of the United Nations) in 2010. The worldwide food import/export network is an economic network in which nodes are countries and edges at each layer represent import/export relationships of a specific food product among countries.
trade_FAOHops2010	18	21	De Domenico (2015)	link	Trade relationships network of Hops amoung countries, obtained from FAO (Food and Agriculture Organization of the United Nations) in 2010. The worldwide food import/export network is an economic network in which nodes are countries and edges at each layer represent import/export relationships of a specific food product among countries.
trade_FAOHorses2010	29	36	De Domenico (2015)	link	Trade relationships network of Horses amoung countries, obtained from FAO (Food and Agriculture Organization of the United Nations) in 2010. The worldwide food import/export network is an economic network in which nodes are countries and edges at each layer represent import/export relationships of a specific food product among countries.
trade_FAOIcecreamandedibleice2010	47	67	De Domenico (2015)	link	Trade relationships network of Ice_cream_and_edible_ice amoung countries, obtained from FAO (Food and Agriculture Organization of the United Nations) in 2010. The worldwide food import/export network is an economic network in which nodes are countries and edges at each layer represent import/export relationships of a specific food product among countries.
trade_FAOInfantfood2010	42	67	De Domenico (2015)	link	Trade relationships network of Infant_food amoung countries, obtained from FAO (Food and Agriculture Organization of the United Nations) in 2010. The worldwide food import/export network is an economic network in which nodes are countries and edges at each layer represent import/export relationships of a specific food product among countries.
trade_FAOJuicecitrusconcentrated2010	26	29	De Domenico (2015)	link	Trade relationships network of Juice_citrus_concentrated amoung countries, obtained from FAO (Food and Agriculture Organization of the United Nations) in 2010. The worldwide food import/export network is an economic network in which nodes are countries and edges at each layer represent import/export relationships of a specific food product among countries.
trade_FAOJuicecitrussinglestrength2010	28	33	De Domenico (2015)	link	Trade relationships network of Juice_citrus_single_strength amoung countries, obtained from FAO (Food and Agriculture Organization of the United Nations) in 2010. The worldwide food import/export network is an economic network in which nodes are countries and edges at each layer represent import/export relationships of a specific food product among countries.
trade_FAOJuicefruitnes2010	87	170	De Domenico (2015)	link	Trade relationships network of Juice_fruit_nes amoung countries, obtained from FAO (Food and Agriculture Organization of the United Nations) in 2010. The worldwide food import/export network is an economic network in which nodes are countries and edges at each layer represent import/export relationships of a specific food product among countries.
trade_FAOJuicegrape2010	35	46	De Domenico (2015)	link	Trade relationships network of Juice_grape amoung countries, obtained from FAO (Food and Agriculture Organization of the United Nations) in 2010. The worldwide food import/export network is an economic network in which nodes are countries and edges at each layer represent import/export relationships of a specific food product among countries.
trade_FAOJuicegrapefruitconcentrated2010	23	24	De Domenico (2015)	link	Trade relationships network of Juice_grapefruit_concentrated amoung countries, obtained from FAO (Food and Agriculture Organization of the United Nations) in 2010. The worldwide food import/export network is an economic network in which nodes are countries and edges at each layer represent import/export relationships of a specific food product among countries.
trade_FAOJuiceorangeconcentrated2010	49	62	De Domenico (2015)	link	Trade relationships network of Juice_orange_concentrated amoung countries, obtained from FAO (Food and Agriculture Organization of the United Nations) in 2010. The worldwide food import/export network is an economic network in which nodes are countries and edges at each layer represent import/export relationships of a specific food product among countries.
trade_FAOJuiceorangesinglestrength2010	42	51	De Domenico (2015)	link	Trade relationships network of Juice_orange_single_strength amoung countries, obtained from FAO (Food and Agriculture Organization of the United Nations) in 2010. The worldwide food import/export network is an economic network in which nodes are countries and edges at each layer represent import/export relationships of a specific food product among countries.
trade_FAOJuicepineapple2010	27	28	De Domenico (2015)	link	Trade relationships network of Juice_pineapple amoung countries, obtained from FAO (Food and Agriculture Organization of the United Nations) in 2010. The worldwide food import/export network is an economic network in which nodes are countries and edges at each layer represent import/export relationships of a specific food product among countries.
trade_FAOJuicepineappleconcentrated2010	32	43	De Domenico (2015)	link	Trade relationships network of Juice_pineapple_concentrated amoung countries, obtained from FAO (Food and Agriculture Organization of the United Nations) in 2010. The worldwide food import/export network is an economic network in which nodes are countries and edges at each layer represent import/export relationships of a specific food product among countries.
trade_FAOKiwifruit2010	24	29	De Domenico (2015)	link	Trade relationships network of Kiwi_fruit amoung countries, obtained from FAO (Food and Agriculture Organization of the United Nations) in 2010. The worldwide food import/export network is an economic network in which nodes are countries and edges at each layer represent import/export relationships of a specific food product among countries.
trade_FAOLactose2010	28	41	De Domenico (2015)	link	Trade relationships network of Lactose amoung countries, obtained from FAO (Food and Agriculture Organization of the United Nations) in 2010. The worldwide food import/export network is an economic network in which nodes are countries and edges at each layer represent import/export relationships of a specific food product among countries.
trade_FAOLemonsandlimes2010	32	42	De Domenico (2015)	link	Trade relationships network of Lemons_and_limes amoung countries, obtained from FAO (Food and Agriculture Organization of the United Nations) in 2010. The worldwide food import/export network is an economic network in which nodes are countries and edges at each layer represent import/export relationships of a specific food product among countries.
trade_FAOLentils2010	30	39	De Domenico (2015)	link	Trade relationships network of Lentils amoung countries, obtained from FAO (Food and Agriculture Organization of the United Nations) in 2010. The worldwide food import/export network is an economic network in which nodes are countries and edges at each layer represent import/export relationships of a specific food product among countries.
trade_FAOLettuceandchicory2010	23	23	De Domenico (2015)	link	Trade relationships network of Lettuce_and_chicory amoung countries, obtained from FAO (Food and Agriculture Organization of the United Nations) in 2010. The worldwide food import/export network is an economic network in which nodes are countries and edges at each layer represent import/export relationships of a specific food product among countries.
trade_FAOLinseed2010	28	30	De Domenico (2015)	link	Trade relationships network of Linseed amoung countries, obtained from FAO (Food and Agriculture Organization of the United Nations) in 2010. The worldwide food import/export network is an economic network in which nodes are countries and edges at each layer represent import/export relationships of a specific food product among countries.
trade_FAOMacaroni2010	66	104	De Domenico (2015)	link	Trade relationships network of Macaroni amoung countries, obtained from FAO (Food and Agriculture Organization of the United Nations) in 2010. The worldwide food import/export network is an economic network in which nodes are countries and edges at each layer represent import/export relationships of a specific food product among countries.
trade_FAOMaize2010	50	82	De Domenico (2015)	link	Trade relationships network of Maize amoung countries, obtained from FAO (Food and Agriculture Organization of the United Nations) in 2010. The worldwide food import/export network is an economic network in which nodes are countries and edges at each layer represent import/export relationships of a specific food product among countries.
trade_FAOMalt2010	29	39	De Domenico (2015)	link	Trade relationships network of Malt amoung countries, obtained from FAO (Food and Agriculture Organization of the United Nations) in 2010. The worldwide food import/export network is an economic network in which nodes are countries and edges at each layer represent import/export relationships of a specific food product among countries.
trade_FAOMangoesmangosteensguavas2010	25	27	De Domenico (2015)	link	Trade relationships network of Mangoes_mangosteens_guavas amoung countries, obtained from FAO (Food and Agriculture Organization of the United Nations) in 2010. The worldwide food import/export network is an economic network in which nodes are countries and edges at each layer represent import/export relationships of a specific food product among countries.
trade_FAOMargarineshort2010	41	57	De Domenico (2015)	link	Trade relationships network of Margarine_short amoung countries, obtained from FAO (Food and Agriculture Organization of the United Nations) in 2010. The worldwide food import/export network is an economic network in which nodes are countries and edges at each layer represent import/export relationships of a specific food product among countries.
trade_FAOMeatbeefpreparations2010	34	42	De Domenico (2015)	link	Trade relationships network of Meat_beef_preparations amoung countries, obtained from FAO (Food and Agriculture Organization of the United Nations) in 2010. The worldwide food import/export network is an economic network in which nodes are countries and edges at each layer represent import/export relationships of a specific food product among countries.
trade_FAOMeatcattle2010	31	32	De Domenico (2015)	link	Trade relationships network of Meat_cattle amoung countries, obtained from FAO (Food and Agriculture Organization of the United Nations) in 2010. The worldwide food import/export network is an economic network in which nodes are countries and edges at each layer represent import/export relationships of a specific food product among countries.
trade_FAOMeatcattleboneless(beefandveal)2010	38	51	De Domenico (2015)	link	Trade relationships network of Meat_cattle_boneless_(beef_and_veal) amoung countries, obtained from FAO (Food and Agriculture Organization of the United Nations) in 2010. The worldwide food import/export network is an economic network in which nodes are countries and edges at each layer represent import/export relationships of a specific food product among countries.
trade_FAOMeatchicken2010	43	70	De Domenico (2015)	link	Trade relationships network of Meat_chicken amoung countries, obtained from FAO (Food and Agriculture Organization of the United Nations) in 2010. The worldwide food import/export network is an economic network in which nodes are countries and edges at each layer represent import/export relationships of a specific food product among countries.
trade_FAOMeatchickencanned2010	43	64	De Domenico (2015)	link	Trade relationships network of Meat_chicken_canned amoung countries, obtained from FAO (Food and Agriculture Organization of the United Nations) in 2010. The worldwide food import/export network is an economic network in which nodes are countries and edges at each layer represent import/export relationships of a specific food product among countries.
trade_FAOMeatdriednes2010	17	17	De Domenico (2015)	link	Trade relationships network of Meat_dried_nes amoung countries, obtained from FAO (Food and Agriculture Organization of the United Nations) in 2010. The worldwide food import/export network is an economic network in which nodes are countries and edges at each layer represent import/export relationships of a specific food product among countries.
trade_FAOMeatpig2010	32	45	De Domenico (2015)	link	Trade relationships network of Meat_pig amoung countries, obtained from FAO (Food and Agriculture Organization of the United Nations) in 2010. The worldwide food import/export network is an economic network in which nodes are countries and edges at each layer represent import/export relationships of a specific food product among countries.
trade_FAOMeatpigpreparations2010	38	57	De Domenico (2015)	link	Trade relationships network of Meat_pig_preparations amoung countries, obtained from FAO (Food and Agriculture Organization of the United Nations) in 2010. The worldwide food import/export network is an economic network in which nodes are countries and edges at each layer represent import/export relationships of a specific food product among countries.
trade_FAOMeatpigsausages2010	41	64	De Domenico (2015)	link	Trade relationships network of Meat_pig_sausages amoung countries, obtained from FAO (Food and Agriculture Organization of the United Nations) in 2010. The worldwide food import/export network is an economic network in which nodes are countries and edges at each layer represent import/export relationships of a specific food product among countries.
trade_FAOMeatpork2010	35	55	De Domenico (2015)	link	Trade relationships network of Meat_pork amoung countries, obtained from FAO (Food and Agriculture Organization of the United Nations) in 2010. The worldwide food import/export network is an economic network in which nodes are countries and edges at each layer represent import/export relationships of a specific food product among countries.
trade_FAOMeatsheep2010	19	21	De Domenico (2015)	link	Trade relationships network of Meat_sheep amoung countries, obtained from FAO (Food and Agriculture Organization of the United Nations) in 2010. The worldwide food import/export network is an economic network in which nodes are countries and edges at each layer represent import/export relationships of a specific food product among countries.
trade_FAOMeatturkey2010	22	27	De Domenico (2015)	link	Trade relationships network of Meat_turkey amoung countries, obtained from FAO (Food and Agriculture Organization of the United Nations) in 2010. The worldwide food import/export network is an economic network in which nodes are countries and edges at each layer represent import/export relationships of a specific food product among countries.
trade_FAOMelonsother2010	21	23	De Domenico (2015)	link	Trade relationships network of Melons_other_(inc.cantaloupes) amoung countries, obtained from FAO (Food and Agriculture Organization of the United Nations) in 2010. The worldwide food import/export network is an economic network in which nodes are countries and edges at each layer represent import/export relationships of a specific food product among countries.
trade_FAOMilkproductsofnaturalconstituentsnes2010	23	26	De Domenico (2015)	link	Trade relationships network of Milk_products_of_natural_constituents_nes amoung countries, obtained from FAO (Food and Agriculture Organization of the United Nations) in 2010. The worldwide food import/export network is an economic network in which nodes are countries and edges at each layer represent import/export relationships of a specific food product among countries.
trade_FAOMilkskimmedcow2010	29	34	De Domenico (2015)	link	Trade relationships network of Milk_skimmed_cow amoung countries, obtained from FAO (Food and Agriculture Organization of the United Nations) in 2010. The worldwide food import/export network is an economic network in which nodes are countries and edges at each layer represent import/export relationships of a specific food product among countries.
trade_FAOMilkskimmeddried2010	53	81	De Domenico (2015)	link	Trade relationships network of Milk_skimmed_dried amoung countries, obtained from FAO (Food and Agriculture Organization of the United Nations) in 2010. The worldwide food import/export network is an economic network in which nodes are countries and edges at each layer represent import/export relationships of a specific food product among countries.
trade_FAOMilkwholecondensed2010	34	38	De Domenico (2015)	link	Trade relationships network of Milk_whole_condensed amoung countries, obtained from FAO (Food and Agriculture Organization of the United Nations) in 2010. The worldwide food import/export network is an economic network in which nodes are countries and edges at each layer represent import/export relationships of a specific food product among countries.
trade_FAOMilkwholedried2010	42	55	De Domenico (2015)	link	Trade relationships network of Milk_whole_dried amoung countries, obtained from FAO (Food and Agriculture Organization of the United Nations) in 2010. The worldwide food import/export network is an economic network in which nodes are countries and edges at each layer represent import/export relationships of a specific food product among countries.
trade_FAOMilkwholeevaporated2010	21	24	De Domenico (2015)	link	Trade relationships network of Milk_whole_evaporated amoung countries, obtained from FAO (Food and Agriculture Organization of the United Nations) in 2010. The worldwide food import/export network is an economic network in which nodes are countries and edges at each layer represent import/export relationships of a specific food product among countries.
trade_FAOMilkwholefreshcow2010	27	31	De Domenico (2015)	link	Trade relationships network of Milk_whole_fresh_cow amoung countries, obtained from FAO (Food and Agriculture Organization of the United Nations) in 2010. The worldwide food import/export network is an economic network in which nodes are countries and edges at each layer represent import/export relationships of a specific food product among countries.
trade_FAOMixesanddoughs2010	62	91	De Domenico (2015)	link	Trade relationships network of Mixes_and_doughs amoung countries, obtained from FAO (Food and Agriculture Organization of the United Nations) in 2010. The worldwide food import/export network is an economic network in which nodes are countries and edges at each layer represent import/export relationships of a specific food product among countries.
trade_FAOMolasses2010	24	24	De Domenico (2015)	link	Trade relationships network of Molasses amoung countries, obtained from FAO (Food and Agriculture Organization of the United Nations) in 2010. The worldwide food import/export network is an economic network in which nodes are countries and edges at each layer represent import/export relationships of a specific food product among countries.
trade_FAOMushroomsandtruffles2010	35	40	De Domenico (2015)	link	Trade relationships network of Mushrooms_and_truffles amoung countries, obtained from FAO (Food and Agriculture Organization of the United Nations) in 2010. The worldwide food import/export network is an economic network in which nodes are countries and edges at each layer represent import/export relationships of a specific food product among countries.
trade_FAOMushroomscanned2010	39	57	De Domenico (2015)	link	Trade relationships network of Mushrooms_canned amoung countries, obtained from FAO (Food and Agriculture Organization of the United Nations) in 2010. The worldwide food import/export network is an economic network in which nodes are countries and edges at each layer represent import/export relationships of a specific food product among countries.
trade_FAONutmegmaceandcardamoms2010	25	37	De Domenico (2015)	link	Trade relationships network of Nutmeg_mace_and_cardamoms amoung countries, obtained from FAO (Food and Agriculture Organization of the United Nations) in 2010. The worldwide food import/export network is an economic network in which nodes are countries and edges at each layer represent import/export relationships of a specific food product among countries.
trade_FAONutsnes2010	37	44	De Domenico (2015)	link	Trade relationships network of Nuts_nes amoung countries, obtained from FAO (Food and Agriculture Organization of the United Nations) in 2010. The worldwide food import/export network is an economic network in which nodes are countries and edges at each layer represent import/export relationships of a specific food product among countries.
trade_FAONutsprepared2010	64	114	De Domenico (2015)	link	Trade relationships network of Nuts_prepared_(exc._groundnuts) amoung countries, obtained from FAO (Food and Agriculture Organization of the United Nations) in 2010. The worldwide food import/export network is an economic network in which nodes are countries and edges at each layer represent import/export relationships of a specific food product among countries.
trade_FAOOffalsediblecattle2010	21	29	De Domenico (2015)	link	Trade relationships network of Offals_edible_cattle amoung countries, obtained from FAO (Food and Agriculture Organization of the United Nations) in 2010. The worldwide food import/export network is an economic network in which nodes are countries and edges at each layer represent import/export relationships of a specific food product among countries.
trade_FAOOffalsliverchicken2010	23	27	De Domenico (2015)	link	Trade relationships network of Offals_liver_chicken amoung countries, obtained from FAO (Food and Agriculture Organization of the United Nations) in 2010. The worldwide food import/export network is an economic network in which nodes are countries and edges at each layer represent import/export relationships of a specific food product among countries.
trade_FAOOffalspigsedible2010	24	28	De Domenico (2015)	link	Trade relationships network of Offals_pigs_edible amoung countries, obtained from FAO (Food and Agriculture Organization of the United Nations) in 2010. The worldwide food import/export network is an economic network in which nodes are countries and edges at each layer represent import/export relationships of a specific food product among countries.
trade_FAOOilboiledetc2010	47	62	De Domenico (2015)	link	Trade relationships network of Oil_boiled_etc amoung countries, obtained from FAO (Food and Agriculture Organization of the United Nations) in 2010. The worldwide food import/export network is an economic network in which nodes are countries and edges at each layer represent import/export relationships of a specific food product among countries.
trade_FAOOilcoconut(copra)2010	31	41	De Domenico (2015)	link	Trade relationships network of Oil_coconut_(copra) amoung countries, obtained from FAO (Food and Agriculture Organization of the United Nations) in 2010. The worldwide food import/export network is an economic network in which nodes are countries and edges at each layer represent import/export relationships of a specific food product among countries.
trade_FAOOilessentialnes2010	89	176	De Domenico (2015)	link	Trade relationships network of Oil_essential_nes amoung countries, obtained from FAO (Food and Agriculture Organization of the United Nations) in 2010. The worldwide food import/export network is an economic network in which nodes are countries and edges at each layer represent import/export relationships of a specific food product among countries.
trade_FAOOilgroundnut2010	26	30	De Domenico (2015)	link	Trade relationships network of Oil_groundnut amoung countries, obtained from FAO (Food and Agriculture Organization of the United Nations) in 2010. The worldwide food import/export network is an economic network in which nodes are countries and edges at each layer represent import/export relationships of a specific food product among countries.
trade_FAOOillinseed2010	21	25	De Domenico (2015)	link	Trade relationships network of Oil_linseed amoung countries, obtained from FAO (Food and Agriculture Organization of the United Nations) in 2010. The worldwide food import/export network is an economic network in which nodes are countries and edges at each layer represent import/export relationships of a specific food product among countries.
trade_FAOOilmaize2010	33	33	De Domenico (2015)	link	Trade relationships network of Oil_maize amoung countries, obtained from FAO (Food and Agriculture Organization of the United Nations) in 2010. The worldwide food import/export network is an economic network in which nodes are countries and edges at each layer represent import/export relationships of a specific food product among countries.
trade_FAOOiloliveresidues2010	19	24	De Domenico (2015)	link	Trade relationships network of Oil_olive_residues amoung countries, obtained from FAO (Food and Agriculture Organization of the United Nations) in 2010. The worldwide food import/export network is an economic network in which nodes are countries and edges at each layer represent import/export relationships of a specific food product among countries.
trade_FAOOilolivevirgin2010	45	75	De Domenico (2015)	link	Trade relationships network of Oil_olive_virgin amoung countries, obtained from FAO (Food and Agriculture Organization of the United Nations) in 2010. The worldwide food import/export network is an economic network in which nodes are countries and edges at each layer represent import/export relationships of a specific food product among countries.
trade_FAOOilpalm2010	38	51	De Domenico (2015)	link	Trade relationships network of Oil_palm amoung countries, obtained from FAO (Food and Agriculture Organization of the United Nations) in 2010. The worldwide food import/export network is an economic network in which nodes are countries and edges at each layer represent import/export relationships of a specific food product among countries.
trade_FAOOilrapeseed2010	32	32	De Domenico (2015)	link	Trade relationships network of Oil_rapeseed amoung countries, obtained from FAO (Food and Agriculture Organization of the United Nations) in 2010. The worldwide food import/export network is an economic network in which nodes are countries and edges at each layer represent import/export relationships of a specific food product among countries.
trade_FAOOilseedsnes2010	54	75	De Domenico (2015)	link	Trade relationships network of Oilseeds_nes amoung countries, obtained from FAO (Food and Agriculture Organization of the United Nations) in 2010. The worldwide food import/export network is an economic network in which nodes are countries and edges at each layer represent import/export relationships of a specific food product among countries.
trade_FAOOilsesame2010	34	53	De Domenico (2015)	link	Trade relationships network of Oil_sesame amoung countries, obtained from FAO (Food and Agriculture Organization of the United Nations) in 2010. The worldwide food import/export network is an economic network in which nodes are countries and edges at each layer represent import/export relationships of a specific food product among countries.
trade_FAOOilsoybean2010	37	49	De Domenico (2015)	link	Trade relationships network of Oil_soybean amoung countries, obtained from FAO (Food and Agriculture Organization of the United Nations) in 2010. The worldwide food import/export network is an economic network in which nodes are countries and edges at each layer represent import/export relationships of a specific food product among countries.
trade_FAOOilsunflower2010	55	82	De Domenico (2015)	link	Trade relationships network of Oil_sunflower amoung countries, obtained from FAO (Food and Agriculture Organization of the United Nations) in 2010. The worldwide food import/export network is an economic network in which nodes are countries and edges at each layer represent import/export relationships of a specific food product among countries.
trade_FAOOilvegetableoriginnes2010	68	103	De Domenico (2015)	link	Trade relationships network of Oil_vegetable_origin_nes amoung countries, obtained from FAO (Food and Agriculture Organization of the United Nations) in 2010. The worldwide food import/export network is an economic network in which nodes are countries and edges at each layer represent import/export relationships of a specific food product among countries.
trade_FAOOlivespreserved2010	38	64	De Domenico (2015)	link	Trade relationships network of Olives_preserved amoung countries, obtained from FAO (Food and Agriculture Organization of the United Nations) in 2010. The worldwide food import/export network is an economic network in which nodes are countries and edges at each layer represent import/export relationships of a specific food product among countries.
trade_FAOOnionsdry2010	40	55	De Domenico (2015)	link	Trade relationships network of Onions_dry amoung countries, obtained from FAO (Food and Agriculture Organization of the United Nations) in 2010. The worldwide food import/export network is an economic network in which nodes are countries and edges at each layer represent import/export relationships of a specific food product among countries.
trade_FAOOranges2010	38	45	De Domenico (2015)	link	Trade relationships network of Oranges amoung countries, obtained from FAO (Food and Agriculture Organization of the United Nations) in 2010. The worldwide food import/export network is an economic network in which nodes are countries and edges at each layer represent import/export relationships of a specific food product among countries.
trade_FAOPastry2010	90	225	De Domenico (2015)	link	Trade relationships network of Pastry amoung countries, obtained from FAO (Food and Agriculture Organization of the United Nations) in 2010. The worldwide food import/export network is an economic network in which nodes are countries and edges at each layer represent import/export relationships of a specific food product among countries.
trade_FAOPears2010	33	43	De Domenico (2015)	link	Trade relationships network of Pears amoung countries, obtained from FAO (Food and Agriculture Organization of the United Nations) in 2010. The worldwide food import/export network is an economic network in which nodes are countries and edges at each layer represent import/export relationships of a specific food product among countries.
trade_FAOPeasdry2010	35	43	De Domenico (2015)	link	Trade relationships network of Peas_dry amoung countries, obtained from FAO (Food and Agriculture Organization of the United Nations) in 2010. The worldwide food import/export network is an economic network in which nodes are countries and edges at each layer represent import/export relationships of a specific food product among countries.
trade_FAOPeasgreen2010	23	23	De Domenico (2015)	link	Trade relationships network of Peas_green amoung countries, obtained from FAO (Food and Agriculture Organization of the United Nations) in 2010. The worldwide food import/export network is an economic network in which nodes are countries and edges at each layer represent import/export relationships of a specific food product among countries.
trade_FAOPepper2010	49	87	De Domenico (2015)	link	Trade relationships network of Pepper_(piper_spp.) amoung countries, obtained from FAO (Food and Agriculture Organization of the United Nations) in 2010. The worldwide food import/export network is an economic network in which nodes are countries and edges at each layer represent import/export relationships of a specific food product among countries.
trade_FAOPetfood2010	45	72	De Domenico (2015)	link	Trade relationships network of Pet_food amoung countries, obtained from FAO (Food and Agriculture Organization of the United Nations) in 2010. The worldwide food import/export network is an economic network in which nodes are countries and edges at each layer represent import/export relationships of a specific food product among countries.
trade_FAOPineapples2010	33	39	De Domenico (2015)	link	Trade relationships network of Pineapples amoung countries, obtained from FAO (Food and Agriculture Organization of the United Nations) in 2010. The worldwide food import/export network is an economic network in which nodes are countries and edges at each layer represent import/export relationships of a specific food product among countries.
trade_FAOPineapplescanned2010	34	44	De Domenico (2015)	link	Trade relationships network of Pineapples_canned amoung countries, obtained from FAO (Food and Agriculture Organization of the United Nations) in 2010. The worldwide food import/export network is an economic network in which nodes are countries and edges at each layer represent import/export relationships of a specific food product among countries.
trade_FAOPlumsandsloes2010	28	27	De Domenico (2015)	link	Trade relationships network of Plums_and_sloes amoung countries, obtained from FAO (Food and Agriculture Organization of the United Nations) in 2010. The worldwide food import/export network is an economic network in which nodes are countries and edges at each layer represent import/export relationships of a specific food product among countries.
trade_FAOPlumsdried(prunes)2010	32	43	De Domenico (2015)	link	Trade relationships network of Plums_dried_(prunes) amoung countries, obtained from FAO (Food and Agriculture Organization of the United Nations) in 2010. The worldwide food import/export network is an economic network in which nodes are countries and edges at each layer represent import/export relationships of a specific food product among countries.
trade_FAOPoppyseed2010	17	20	De Domenico (2015)	link	Trade relationships network of Poppy_seed amoung countries, obtained from FAO (Food and Agriculture Organization of the United Nations) in 2010. The worldwide food import/export network is an economic network in which nodes are countries and edges at each layer represent import/export relationships of a specific food product among countries.
trade_FAOPotatoes2010	37	46	De Domenico (2015)	link	Trade relationships network of Potatoes amoung countries, obtained from FAO (Food and Agriculture Organization of the United Nations) in 2010. The worldwide food import/export network is an economic network in which nodes are countries and edges at each layer represent import/export relationships of a specific food product among countries.
trade_FAOPotatoesfrozen2010	36	46	De Domenico (2015)	link	Trade relationships network of Potatoes_frozen amoung countries, obtained from FAO (Food and Agriculture Organization of the United Nations) in 2010. The worldwide food import/export network is an economic network in which nodes are countries and edges at each layer represent import/export relationships of a specific food product among countries.
trade_FAORaisins2010	44	99	De Domenico (2015)	link	Trade relationships network of Raisins amoung countries, obtained from FAO (Food and Agriculture Organization of the United Nations) in 2010. The worldwide food import/export network is an economic network in which nodes are countries and edges at each layer represent import/export relationships of a specific food product among countries.
trade_FAORapeseed2010	28	34	De Domenico (2015)	link	Trade relationships network of Rapeseed amoung countries, obtained from FAO (Food and Agriculture Organization of the United Nations) in 2010. The worldwide food import/export network is an economic network in which nodes are countries and edges at each layer represent import/export relationships of a specific food product among countries.
trade_FAORicebroken2010	31	47	De Domenico (2015)	link	Trade relationships network of Rice_broken amoung countries, obtained from FAO (Food and Agriculture Organization of the United Nations) in 2010. The worldwide food import/export network is an economic network in which nodes are countries and edges at each layer represent import/export relationships of a specific food product among countries.
trade_FAORicehusked2010	37	66	De Domenico (2015)	link	Trade relationships network of Rice_husked amoung countries, obtained from FAO (Food and Agriculture Organization of the United Nations) in 2010. The worldwide food import/export network is an economic network in which nodes are countries and edges at each layer represent import/export relationships of a specific food product among countries.
trade_FAORicemilled2010	63	146	De Domenico (2015)	link	Trade relationships network of Rice_milled amoung countries, obtained from FAO (Food and Agriculture Organization of the United Nations) in 2010. The worldwide food import/export network is an economic network in which nodes are countries and edges at each layer represent import/export relationships of a specific food product among countries.
trade_FAORicepaddy2010	27	32	De Domenico (2015)	link	Trade relationships network of Rice_paddy amoung countries, obtained from FAO (Food and Agriculture Organization of the United Nations) in 2010. The worldwide food import/export network is an economic network in which nodes are countries and edges at each layer represent import/export relationships of a specific food product among countries.
trade_FAORootsandtubersnes2010	37	39	De Domenico (2015)	link	Trade relationships network of Roots_and_tubers_nes amoung countries, obtained from FAO (Food and Agriculture Organization of the United Nations) in 2010. The worldwide food import/export network is an economic network in which nodes are countries and edges at each layer represent import/export relationships of a specific food product among countries.
trade_FAORubbernaturaldry2010	49	76	De Domenico (2015)	link	Trade relationships network of Rubber_natural_dry amoung countries, obtained from FAO (Food and Agriculture Organization of the United Nations) in 2010. The worldwide food import/export network is an economic network in which nodes are countries and edges at each layer represent import/export relationships of a specific food product among countries.
trade_FAOSesameseed2010	42	54	De Domenico (2015)	link	Trade relationships network of Sesame_seed amoung countries, obtained from FAO (Food and Agriculture Organization of the United Nations) in 2010. The worldwide food import/export network is an economic network in which nodes are countries and edges at each layer represent import/export relationships of a specific food product among countries.
trade_FAOSoyasauce2010	45	91	De Domenico (2015)	link	Trade relationships network of Soya_sauce amoung countries, obtained from FAO (Food and Agriculture Organization of the United Nations) in 2010. The worldwide food import/export network is an economic network in which nodes are countries and edges at each layer represent import/export relationships of a specific food product among countries.
trade_FAOSoybeans2010	39	50	De Domenico (2015)	link	Trade relationships network of Soybeans amoung countries, obtained from FAO (Food and Agriculture Organization of the United Nations) in 2010. The worldwide food import/export network is an economic network in which nodes are countries and edges at each layer represent import/export relationships of a specific food product among countries.
trade_FAOSpicesnes2010	89	211	De Domenico (2015)	link	Trade relationships network of Spices_nes amoung countries, obtained from FAO (Food and Agriculture Organization of the United Nations) in 2010. The worldwide food import/export network is an economic network in which nodes are countries and edges at each layer represent import/export relationships of a specific food product among countries.
trade_FAOStrawberries2010	33	39	De Domenico (2015)	link	Trade relationships network of Strawberries amoung countries, obtained from FAO (Food and Agriculture Organization of the United Nations) in 2010. The worldwide food import/export network is an economic network in which nodes are countries and edges at each layer represent import/export relationships of a specific food product among countries.
trade_FAOStrawhusks2010	22	22	De Domenico (2015)	link	Trade relationships network of Straw_husks amoung countries, obtained from FAO (Food and Agriculture Organization of the United Nations) in 2010. The worldwide food import/export network is an economic network in which nodes are countries and edges at each layer represent import/export relationships of a specific food product among countries.
trade_FAOSugarconfectionery2010	100	358	De Domenico (2015)	link	Trade relationships network of Sugar_confectionery amoung countries, obtained from FAO (Food and Agriculture Organization of the United Nations) in 2010. The worldwide food import/export network is an economic network in which nodes are countries and edges at each layer represent import/export relationships of a specific food product among countries.
trade_FAOSugarnes2010	63	119	De Domenico (2015)	link	Trade relationships network of Sugar_nes amoung countries, obtained from FAO (Food and Agriculture Organization of the United Nations) in 2010. The worldwide food import/export network is an economic network in which nodes are countries and edges at each layer represent import/export relationships of a specific food product among countries.
trade_FAOSugarRawCentrifugal2010	60	98	De Domenico (2015)	link	Trade relationships network of Sugar_Raw_Centrifugal amoung countries, obtained from FAO (Food and Agriculture Organization of the United Nations) in 2010. The worldwide food import/export network is an economic network in which nodes are countries and edges at each layer represent import/export relationships of a specific food product among countries.
trade_FAOSugarrefined2010	84	186	De Domenico (2015)	link	Trade relationships network of Sugar_refined amoung countries, obtained from FAO (Food and Agriculture Organization of the United Nations) in 2010. The worldwide food import/export network is an economic network in which nodes are countries and edges at each layer represent import/export relationships of a specific food product among countries.
trade_FAOSunflowerseed2010	52	88	De Domenico (2015)	link	Trade relationships network of Sunflower_seed amoung countries, obtained from FAO (Food and Agriculture Organization of the United Nations) in 2010. The worldwide food import/export network is an economic network in which nodes are countries and edges at each layer represent import/export relationships of a specific food product among countries.
trade_FAOSweetcornfrozen2010	33	46	De Domenico (2015)	link	Trade relationships network of Sweet_corn_frozen amoung countries, obtained from FAO (Food and Agriculture Organization of the United Nations) in 2010. The worldwide food import/export network is an economic network in which nodes are countries and edges at each layer represent import/export relationships of a specific food product among countries.
trade_FAOSweetcornpreporpreserved2010	35	64	De Domenico (2015)	link	Trade relationships network of Sweet_corn_prep_or_preserved amoung countries, obtained from FAO (Food and Agriculture Organization of the United Nations) in 2010. The worldwide food import/export network is an economic network in which nodes are countries and edges at each layer represent import/export relationships of a specific food product among countries.
trade_FAOTallow2010	15	17	De Domenico (2015)	link	Trade relationships network of Tallow amoung countries, obtained from FAO (Food and Agriculture Organization of the United Nations) in 2010. The worldwide food import/export network is an economic network in which nodes are countries and edges at each layer represent import/export relationships of a specific food product among countries.
trade_FAOTangerinesmandarinsclementinessatsumas2010	54	87	De Domenico (2015)	link	Trade relationships network of Tangerines_mandarins_clementines_satsumas amoung countries, obtained from FAO (Food and Agriculture Organization of the United Nations) in 2010. The worldwide food import/export network is an economic network in which nodes are countries and edges at each layer represent import/export relationships of a specific food product among countries.
trade_FAOTea2010	85	232	De Domenico (2015)	link	Trade relationships network of Tea amoung countries, obtained from FAO (Food and Agriculture Organization of the United Nations) in 2010. The worldwide food import/export network is an economic network in which nodes are countries and edges at each layer represent import/export relationships of a specific food product among countries.
trade_FAOTeamateextracts2010	58	116	De Domenico (2015)	link	Trade relationships network of Tea_mate_extracts amoung countries, obtained from FAO (Food and Agriculture Organization of the United Nations) in 2010. The worldwide food import/export network is an economic network in which nodes are countries and edges at each layer represent import/export relationships of a specific food product among countries.
trade_FAOTobaccoproductsnes2010	59	107	De Domenico (2015)	link	Trade relationships network of Tobacco_products_nes amoung countries, obtained from FAO (Food and Agriculture Organization of the United Nations) in 2010. The worldwide food import/export network is an economic network in which nodes are countries and edges at each layer represent import/export relationships of a specific food product among countries.
trade_FAOTobaccounmanufactured2010	54	125	De Domenico (2015)	link	Trade relationships network of Tobacco_unmanufactured amoung countries, obtained from FAO (Food and Agriculture Organization of the United Nations) in 2010. The worldwide food import/export network is an economic network in which nodes are countries and edges at each layer represent import/export relationships of a specific food product among countries.
trade_FAOTomatoes2010	47	69	De Domenico (2015)	link	Trade relationships network of Tomatoes amoung countries, obtained from FAO (Food and Agriculture Organization of the United Nations) in 2010. The worldwide food import/export network is an economic network in which nodes are countries and edges at each layer represent import/export relationships of a specific food product among countries.
trade_FAOTomatoespaste2010	53	94	De Domenico (2015)	link	Trade relationships network of Tomatoes_paste amoung countries, obtained from FAO (Food and Agriculture Organization of the United Nations) in 2010. The worldwide food import/export network is an economic network in which nodes are countries and edges at each layer represent import/export relationships of a specific food product among countries.
trade_FAOTomatoespeeled2010	40	67	De Domenico (2015)	link	Trade relationships network of Tomatoes_peeled amoung countries, obtained from FAO (Food and Agriculture Organization of the United Nations) in 2010. The worldwide food import/export network is an economic network in which nodes are countries and edges at each layer represent import/export relationships of a specific food product among countries.
trade_FAOVanilla2010	33	40	De Domenico (2015)	link	Trade relationships network of Vanilla amoung countries, obtained from FAO (Food and Agriculture Organization of the United Nations) in 2010. The worldwide food import/export network is an economic network in which nodes are countries and edges at each layer represent import/export relationships of a specific food product among countries.
trade_FAOVegetablesdehydrated2010	69	152	De Domenico (2015)	link	Trade relationships network of Vegetables_dehydrated amoung countries, obtained from FAO (Food and Agriculture Organization of the United Nations) in 2010. The worldwide food import/export network is an economic network in which nodes are countries and edges at each layer represent import/export relationships of a specific food product among countries.
trade_FAOVegetablesfreshnes2010	85	126	De Domenico (2015)	link	Trade relationships network of Vegetables_fresh_nes amoung countries, obtained from FAO (Food and Agriculture Organization of the United Nations) in 2010. The worldwide food import/export network is an economic network in which nodes are countries and edges at each layer represent import/export relationships of a specific food product among countries.
trade_FAOVegetablesfreshordriedproductsnes2010	62	97	De Domenico (2015)	link	Trade relationships network of Vegetables_fresh_or_dried_products_nes amoung countries, obtained from FAO (Food and Agriculture Organization of the United Nations) in 2010. The worldwide food import/export network is an economic network in which nodes are countries and edges at each layer represent import/export relationships of a specific food product among countries.
trade_FAOVegetablesfrozen2010	75	133	De Domenico (2015)	link	Trade relationships network of Vegetables_frozen amoung countries, obtained from FAO (Food and Agriculture Organization of the United Nations) in 2010. The worldwide food import/export network is an economic network in which nodes are countries and edges at each layer represent import/export relationships of a specific food product among countries.
trade_FAOVegetableshomogenizedpreparations2010	28	37	De Domenico (2015)	link	Trade relationships network of Vegetables_homogenized_preparations amoung countries, obtained from FAO (Food and Agriculture Organization of the United Nations) in 2010. The worldwide food import/export network is an economic network in which nodes are countries and edges at each layer represent import/export relationships of a specific food product among countries.
trade_FAOVegetablesinvinegar2010	78	194	De Domenico (2015)	link	Trade relationships network of Vegetables_in_vinegar amoung countries, obtained from FAO (Food and Agriculture Organization of the United Nations) in 2010. The worldwide food import/export network is an economic network in which nodes are countries and edges at each layer represent import/export relationships of a specific food product among countries.
trade_FAOVegetablespreservedfrozen2010	62	100	De Domenico (2015)	link	Trade relationships network of Vegetables_preserved_frozen amoung countries, obtained from FAO (Food and Agriculture Organization of the United Nations) in 2010. The worldwide food import/export network is an economic network in which nodes are countries and edges at each layer represent import/export relationships of a specific food product among countries.
trade_FAOVegetablespreservednes2010	88	258	De Domenico (2015)	link	Trade relationships network of Vegetables_preserved_nes amoung countries, obtained from FAO (Food and Agriculture Organization of the United Nations) in 2010. The worldwide food import/export network is an economic network in which nodes are countries and edges at each layer represent import/export relationships of a specific food product among countries.
trade_FAOVegetablestemporarilypreserved2010	48	66	De Domenico (2015)	link	Trade relationships network of Vegetables_temporarily_preserved amoung countries, obtained from FAO (Food and Agriculture Organization of the United Nations) in 2010. The worldwide food import/export network is an economic network in which nodes are countries and edges at each layer represent import/export relationships of a specific food product among countries.
trade_FAOVermouthsandsimilar2010	23	32	De Domenico (2015)	link	Trade relationships network of Vermouths_and_similar amoung countries, obtained from FAO (Food and Agriculture Organization of the United Nations) in 2010. The worldwide food import/export network is an economic network in which nodes are countries and edges at each layer represent import/export relationships of a specific food product among countries.
trade_FAOWafers2010	59	100	De Domenico (2015)	link	Trade relationships network of Wafers amoung countries, obtained from FAO (Food and Agriculture Organization of the United Nations) in 2010. The worldwide food import/export network is an economic network in which nodes are countries and edges at each layer represent import/export relationships of a specific food product among countries.
trade_FAOWalnutsshelled2010	42	53	De Domenico (2015)	link	Trade relationships network of Walnuts_shelled amoung countries, obtained from FAO (Food and Agriculture Organization of the United Nations) in 2010. The worldwide food import/export network is an economic network in which nodes are countries and edges at each layer represent import/export relationships of a specific food product among countries.
trade_FAOWalnutswithshell2010	23	27	De Domenico (2015)	link	Trade relationships network of Walnuts_with_shell amoung countries, obtained from FAO (Food and Agriculture Organization of the United Nations) in 2010. The worldwide food import/export network is an economic network in which nodes are countries and edges at each layer represent import/export relationships of a specific food product among countries.
trade_FAOWatermelons2010	38	46	De Domenico (2015)	link	Trade relationships network of Watermelons amoung countries, obtained from FAO (Food and Agriculture Organization of the United Nations) in 2010. The worldwide food import/export network is an economic network in which nodes are countries and edges at each layer represent import/export relationships of a specific food product among countries.
trade_FAOWatersiceetc2010	82	178	De Domenico (2015)	link	Trade relationships network of Watersice_etc amoung countries, obtained from FAO (Food and Agriculture Organization of the United Nations) in 2010. The worldwide food import/export network is an economic network in which nodes are countries and edges at each layer represent import/export relationships of a specific food product among countries.
trade_FAOWheat2010	58	82	De Domenico (2015)	link	Trade relationships network of Wheat amoung countries, obtained from FAO (Food and Agriculture Organization of the United Nations) in 2010. The worldwide food import/export network is an economic network in which nodes are countries and edges at each layer represent import/export relationships of a specific food product among countries.
trade_FAOWheydry2010	35	54	De Domenico (2015)	link	Trade relationships network of Whey_dry amoung countries, obtained from FAO (Food and Agriculture Organization of the United Nations) in 2010. The worldwide food import/export network is an economic network in which nodes are countries and edges at each layer represent import/export relationships of a specific food product among countries.
trade_FAOWine2010	78	224	De Domenico (2015)	link	Trade relationships network of Wine amoung countries, obtained from FAO (Food and Agriculture Organization of the United Nations) in 2010. The worldwide food import/export network is an economic network in which nodes are countries and edges at each layer represent import/export relationships of a specific food product among countries.
trade_FAOYoghurtconcentratedornot2010	34	42	De Domenico (2015)	link	Trade relationships network of Yoghurt_concentrated_or_not amoung countries, obtained from FAO (Food and Agriculture Organization of the United Nations) in 2010. The worldwide food import/export network is an economic network in which nodes are countries and edges at each layer represent import/export relationships of a specific food product among countries.
trade_GLSN	977	16680	Xu (2020)	link	Global Liner Shipping Network (GLSN). Data on port rotations of liner services from the Alphaliner database (04/2015). Nodes are ports, and a link between two ports exists if they are both visited in a port rotation.
trade_manifacturesmetal	80	875	Smith (1992)	link	Network of trade miscellaneous manufactures of metal among 80 countries in 1994. The arcs represent imports by one country from another of some goods.
trade_russiamedieval	39	53	Pitts (1978)	link	Medieval trade and communication along the rivers of Russia.
trade_gleditsch2004	187	10252	Gleditsch (2002)	link	These data provide estimates of trade flows between independent states (1948-2000) and GDP per capita of independent states (1950-2011). Version 4.1.
trade_barbieri2012	190	9167	Barbieri (2009)	link	The trade datasets are based on two data collections of exports and imports among states over the period of 1870-2008: (1) Correlates of War Project Trade Data Set Codebook, Version 3.0; (2) Gleditsch (2002)
trade_barbieri2016	186	12518	Barbieri (2009)	link	The data set includes annual dyadic and national trade figures for sovereign states within the international system, as defined by the Correlates of War Project. The current version covers the period 1870-2014. Correlates of War Project Trade Data Set Codebook, Version 4.0

## Sheet: internet
name	N	E	first author (year)	reference	description
internet_AS199909_IPv4	5859	9670	Oliveira (2008)	link
internet_AS199910_IPv4	6009	10592	Oliveira (2008)	link
internet_AS199912_IPv4	909	1030	Oliveira (2008)	link
internet_AS200002_IPv4	7003	14135	Oliveira (2008)	link
internet_AS200003_IPv4	7340	15464	Oliveira (2008)	link
internet_AS200004_IPv4	7605	16140	Oliveira (2008)	link
internet_AS200005_IPv4	7829	16798	Oliveira (2008)	link
internet_AS200006_IPv4	7893	15995	Oliveira (2008)	link
internet_AS200007_IPv4	8240	17307	Oliveira (2008)	link
internet_AS200008_IPv4	8725	19619	Oliveira (2008)	link
internet_AS200009_IPv4	9211	22153	Oliveira (2008)	link
internet_AS200010_IPv4	9413	23059	Oliveira (2008)	link
internet_AS200011_IPv4	9768	23619	Oliveira (2008)	link
internet_AS200012_IPv4	10044	24927	Oliveira (2008)	link
internet_AS200101_IPv4	10301	24710	Oliveira (2008)	link
internet_AS200102_IPv4	10680	25748	Oliveira (2008)	link
internet_AS200103_IPv4	11091	26726	Oliveira (2008)	link
internet_AS200104_IPv4	11237	26895	Oliveira (2008)	link
internet_AS200105_IPv4	11545	27402	Oliveira (2008)	link
internet_AS200106_IPv4	11769	28910	Oliveira (2008)	link
internet_AS200107_IPv4	12077	29596	Oliveira (2008)	link
internet_AS200108_IPv4	12168	29269	Oliveira (2008)	link
internet_AS200109_IPv4	12347	29178	Oliveira (2008)	link
internet_AS200110_IPv4	12653	30799	Oliveira (2008)	link
internet_AS200111_IPv4	12784	31226	Oliveira (2008)	link
internet_AS200112_IPv4	12866	30802	Oliveira (2008)	link
internet_AS200201_IPv4	13013	31456	Oliveira (2008)	link
internet_AS200202_IPv4	13214	32075	Oliveira (2008)	link
internet_AS200203_IPv4	13381	32243	Oliveira (2008)	link
internet_AS200204_IPv4	13514	32057	Oliveira (2008)	link
internet_AS200205_IPv4	13760	32519	Oliveira (2008)	link
internet_AS200206_IPv4	13824	32498	Oliveira (2008)	link
internet_AS200207_IPv4	13967	33333	Oliveira (2008)	link
internet_AS200208_IPv4	14088	32764	Oliveira (2008)	link
internet_AS200209_IPv4	14270	32829	Oliveira (2008)	link
internet_AS200210_IPv4	14545	34820	Oliveira (2008)	link
internet_AS200211_IPv4	14602	34906	Oliveira (2008)	link
internet_AS200211_IPv6	281	1210	Oliveira (2008)	link
internet_AS200212_IPv4	14805	35348	Oliveira (2008)	link
internet_AS200212_IPv6	289	1263	Oliveira (2008)	link
internet_AS200301_IPv4	15008	36102	Oliveira (2008)	link
internet_AS200301_IPv6	301	1284	Oliveira (2008)	link
internet_AS200302_IPv4	15172	36883	Oliveira (2008)	link
internet_AS200302_IPv6	335	1252	Oliveira (2008)	link
internet_AS200303_IPv4	15326	36997	Oliveira (2008)	link
internet_AS200303_IPv6	322	1282	Oliveira (2008)	link
internet_AS200304_IPv4	15563	38315	Oliveira (2008)	link
internet_AS200304_IPv6	337	1341	Oliveira (2008)	link
internet_AS200305_IPv4	15741	40446	Oliveira (2008)	link
internet_AS200305_IPv6	355	1406	Oliveira (2008)	link
internet_AS200306_IPv4	15892	41613	Oliveira (2008)	link
internet_AS200306_IPv6	391	1513	Oliveira (2008)	link
internet_AS200307_IPv4	16142	43016	Oliveira (2008)	link
internet_AS200307_IPv6	390	1478	Oliveira (2008)	link
internet_AS200308_IPv4	16189	41610	Oliveira (2008)	link
internet_AS200308_IPv6	391	1493	Oliveira (2008)	link
internet_AS200309_IPv4	16333	42026	Oliveira (2008)	link
internet_AS200309_IPv6	410	1581	Oliveira (2008)	link
internet_AS200310_IPv4	16549	43135	Oliveira (2008)	link
internet_AS200310_IPv6	422	1641	Oliveira (2008)	link
internet_AS200311_IPv4	16682	43766	Oliveira (2008)	link
internet_AS200311_IPv6	422	1615	Oliveira (2008)	link
internet_AS200312_IPv4	16816	44331	Oliveira (2008)	link
internet_AS200312_IPv6	432	1683	Oliveira (2008)	link
internet_AS200401_IPv4	16974	44399	Oliveira (2008)	link
internet_AS200401_IPv6	429	1654	Oliveira (2008)	link
internet_AS200402_IPv4	17158	45807	Oliveira (2008)	link
internet_AS200402_IPv6	432	1664	Oliveira (2008)	link
internet_AS200403_IPv4	17436	49283	Oliveira (2008)	link
internet_AS200403_IPv6	444	1721	Oliveira (2008)	link
internet_AS200404_IPv4	17660	49981	Oliveira (2008)	link
internet_AS200404_IPv6	453	1746	Oliveira (2008)	link
internet_AS200405_IPv4	17807	49650	Oliveira (2008)	link
internet_AS200405_IPv6	467	1794	Oliveira (2008)	link
internet_AS200406_IPv4	18014	50207	Oliveira (2008)	link
internet_AS200406_IPv6	478	1884	Oliveira (2008)	link
internet_AS200407_IPv4	18225	51907	Oliveira (2008)	link
internet_AS200407_IPv6	487	1960	Oliveira (2008)	link
internet_AS200408_IPv4	18461	52390	Oliveira (2008)	link
internet_AS200408_IPv6	493	1988	Oliveira (2008)	link
internet_AS200409_IPv4	18632	53300	Oliveira (2008)	link
internet_AS200409_IPv6	508	2041	Oliveira (2008)	link
internet_AS200410_IPv4	18869	53494	Oliveira (2008)	link
internet_AS200410_IPv6	524	2080	Oliveira (2008)	link
internet_AS200411_IPv4	18997	54168	Oliveira (2008)	link
internet_AS200411_IPv6	528	2094	Oliveira (2008)	link
internet_AS200412_IPv4	19206	54544	Oliveira (2008)	link
internet_AS200412_IPv6	551	2110	Oliveira (2008)	link
internet_AS200501_IPv4	19406	54581	Oliveira (2008)	link
internet_AS200501_IPv6	552	2166	Oliveira (2008)	link
internet_AS200502_IPv4	19540	55223	Oliveira (2008)	link
internet_AS200502_IPv6	567	2169	Oliveira (2008)	link
internet_AS200503_IPv4	19773	55842	Oliveira (2008)	link
internet_AS200503_IPv6	570	2193	Oliveira (2008)	link
internet_AS200504_IPv4	20037	56136	Oliveira (2008)	link
internet_AS200504_IPv6	575	2212	Oliveira (2008)	link
internet_AS200505_IPv4	20277	57238	Oliveira (2008)	link
internet_AS200505_IPv6	586	2211	Oliveira (2008)	link
internet_AS200506_IPv4	20573	58121	Oliveira (2008)	link
internet_AS200506_IPv6	592	2173	Oliveira (2008)	link
internet_AS200507_IPv4	20694	58385	Oliveira (2008)	link
internet_AS200507_IPv6	608	2200	Oliveira (2008)	link
internet_AS200508_IPv4	20914	59129	Oliveira (2008)	link
internet_AS200508_IPv6	602	2222	Oliveira (2008)	link
internet_AS200509_IPv4	21102	59950	Oliveira (2008)	link
internet_AS200509_IPv6	608	2214	Oliveira (2008)	link
internet_AS200510_IPv4	21300	60732	Oliveira (2008)	link
internet_AS200510_IPv6	620	2244	Oliveira (2008)	link
internet_AS200511_IPv4	21503	61749	Oliveira (2008)	link
internet_AS200511_IPv6	627	2252	Oliveira (2008)	link
internet_AS200512_IPv4	21719	61582	Oliveira (2008)	link
internet_AS200512_IPv6	642	2268	Oliveira (2008)	link
internet_AS200601_IPv4	21926	62600	Oliveira (2008)	link
internet_AS200601_IPv6	646	2312	Oliveira (2008)	link
internet_AS200602_IPv4	22132	63052	Oliveira (2008)	link
internet_AS200602_IPv6	655	2344	Oliveira (2008)	link
internet_AS200603_IPv4	22404	64363	Oliveira (2008)	link
internet_AS200603_IPv6	667	2359	Oliveira (2008)	link
internet_AS200604_IPv4	22602	64335	Oliveira (2008)	link
internet_AS200604_IPv6	658	2352	Oliveira (2008)	link
internet_AS200605_IPv4	22853	65259	Oliveira (2008)	link
internet_AS200605_IPv6	695	2406	Oliveira (2008)	link
internet_AS200606_IPv4	23101	66332	Oliveira (2008)	link
internet_AS200606_IPv6	678	2442	Oliveira (2008)	link
internet_AS200607_IPv4	23347	67414	Oliveira (2008)	link
internet_AS200607_IPv6	666	2291	Oliveira (2008)	link
internet_AS200608_IPv4	23571	67687	Oliveira (2008)	link
internet_AS200608_IPv6	713	2361	Oliveira (2008)	link
internet_AS200609_IPv4	23856	69088	Oliveira (2008)	link
internet_AS200609_IPv6	713	2395	Oliveira (2008)	link
internet_AS200610_IPv4	24064	69742	Oliveira (2008)	link
internet_AS200610_IPv6	725	2521	Oliveira (2008)	link
internet_AS200611_IPv4	24394	71487	Oliveira (2008)	link
internet_AS200611_IPv6	739	2609	Oliveira (2008)	link
internet_AS200612_IPv4	24584	71200	Oliveira (2008)	link
internet_AS200612_IPv6	737	2552	Oliveira (2008)	link
internet_AS200701_IPv4	24810	74022	Oliveira (2008)	link
internet_AS200701_IPv6	752	2689	Oliveira (2008)	link
internet_AS200702_IPv4	25087	75606	Oliveira (2008)	link
internet_AS200702_IPv6	772	2743	Oliveira (2008)	link
internet_AS200703_IPv4	25395	76870	Oliveira (2008)	link
internet_AS200703_IPv6	783	2749	Oliveira (2008)	link
internet_AS200704_IPv4	25624	76315	Oliveira (2008)	link
internet_AS200704_IPv6	801	2767	Oliveira (2008)	link
internet_AS200705_IPv4	25915	78042	Oliveira (2008)	link
internet_AS200705_IPv6	812	2765	Oliveira (2008)	link
internet_AS200706_IPv4	26182	78734	Oliveira (2008)	link
internet_AS200706_IPv6	834	2763	Oliveira (2008)	link
internet_AS200707_IPv4	26439	79557	Oliveira (2008)	link
internet_AS200707_IPv6	840	2921	Oliveira (2008)	link
internet_AS200708_IPv4	26686	80248	Oliveira (2008)	link
internet_AS200708_IPv6	861	2939	Oliveira (2008)	link
internet_AS200709_IPv4	26898	80695	Oliveira (2008)	link
internet_AS200709_IPv6	892	3007	Oliveira (2008)	link
internet_AS200710_IPv4	27231	82357	Oliveira (2008)	link
internet_AS200710_IPv6	911	3138	Oliveira (2008)	link
internet_AS200711_IPv4	27474	83537	Oliveira (2008)	link
internet_AS200711_IPv6	925	3182	Oliveira (2008)	link
internet_AS200712_IPv4	27597	84086	Oliveira (2008)	link
internet_AS200712_IPv6	955	3310	Oliveira (2008)	link
internet_AS200801_IPv4	27868	84953	Oliveira (2008)	link
internet_AS200801_IPv6	955	3223	Oliveira (2008)	link
internet_AS200802_IPv4	28113	86803	Oliveira (2008)	link
internet_AS200802_IPv6	974	3324	Oliveira (2008)	link
internet_AS200803_IPv4	28474	89178	Oliveira (2008)	link
internet_AS200803_IPv6	998	3466	Oliveira (2008)	link
internet_AS200804_IPv4	28722	89507	Oliveira (2008)	link
internet_AS200804_IPv6	1023	3496	Oliveira (2008)	link
internet_AS200805_IPv4	28965	88031	Oliveira (2008)	link
internet_AS200805_IPv6	1066	3942	Oliveira (2008)	link
internet_AS200806_IPv4	29236	88899	Oliveira (2008)	link
internet_AS200806_IPv6	1100	4192	Oliveira (2008)	link
internet_AS200807_IPv4	29536	91994	Oliveira (2008)	link
internet_AS200807_IPv6	1138	4354	Oliveira (2008)	link
internet_AS200808_IPv4	29735	91830	Oliveira (2008)	link
internet_AS200808_IPv6	1160	4390	Oliveira (2008)	link
internet_AS200809_IPv4	30030	100288	Oliveira (2008)	link
internet_AS200809_IPv6	1209	4735	Oliveira (2008)	link
internet_AS200810_IPv4	30345	96829	Oliveira (2008)	link
internet_AS200810_IPv6	1257	4808	Oliveira (2008)	link
internet_AS200811_IPv4	30592	96818	Oliveira (2008)	link
internet_AS200811_IPv6	1297	5064	Oliveira (2008)	link
internet_AS200812_IPv4	30893	97206	Oliveira (2008)	link
internet_AS200812_IPv6	1339	5263	Oliveira (2008)	link
internet_AS200901_IPv4	31293	98988	Oliveira (2008)	link
internet_AS200901_IPv6	1374	5384	Oliveira (2008)	link
internet_AS200902_IPv4	31482	99041	Oliveira (2008)	link
internet_AS200902_IPv6	1403	5505	Oliveira (2008)	link
internet_AS200903_IPv4	31865	99132	Oliveira (2008)	link
internet_AS200903_IPv6	1457	5694	Oliveira (2008)	link
internet_AS200904_IPv4	32126	99587	Oliveira (2008)	link
internet_AS200904_IPv6	1497	5842	Oliveira (2008)	link
internet_AS200905_IPv4	32108	99262	Oliveira (2008)	link
internet_AS200905_IPv6	1548	6029	Oliveira (2008)	link
internet_AS200906_IPv4	32334	99948	Oliveira (2008)	link
internet_AS200906_IPv6	1600	6113	Oliveira (2008)	link
internet_AS200907_IPv4	32659	103270	Oliveira (2008)	link
internet_AS200907_IPv6	1657	6449	Oliveira (2008)	link
internet_AS200908_IPv4	32866	103008	Oliveira (2008)	link
internet_AS200908_IPv6	1745	6805	Oliveira (2008)	link
internet_AS200909_IPv4	33120	104775	Oliveira (2008)	link
internet_AS200909_IPv6	1800	7134	Oliveira (2008)	link
internet_AS200910_IPv4	33454	106665	Oliveira (2008)	link
internet_AS200910_IPv6	1850	7282	Oliveira (2008)	link
internet_AS200911_IPv4	33615	107186	Oliveira (2008)	link
internet_AS200911_IPv6	1916	7831	Oliveira (2008)	link
internet_AS200912_IPv4	33870	107819	Oliveira (2008)	link
internet_AS200912_IPv6	1977	7777	Oliveira (2008)	link
internet_AS201001_IPv4	33998	107748	Oliveira (2008)	link
internet_AS201001_IPv6	2017	7957	Oliveira (2008)	link
internet_AS201002_IPv4	34279	105620	Oliveira (2008)	link
internet_AS201002_IPv6	2119	8486	Oliveira (2008)	link
internet_AS201003_IPv4	34682	109209	Oliveira (2008)	link
internet_AS201003_IPv6	2255	9217	Oliveira (2008)	link
internet_AS201004_IPv4	34903	110461	Oliveira (2008)	link
internet_AS201004_IPv6	2282	9270	Oliveira (2008)	link
internet_AS201005_IPv4	35149	111280	Oliveira (2008)	link
internet_AS201005_IPv6	2381	9513	Oliveira (2008)	link
internet_AS201006_IPv4	35356	114128	Oliveira (2008)	link
internet_AS201006_IPv6	2485	10311	Oliveira (2008)	link
internet_AS201007_IPv4	35630	111900	Oliveira (2008)	link
internet_AS201007_IPv6	2556	10353	Oliveira (2008)	link
internet_AS201008_IPv4	35908	113497	Oliveira (2008)	link
internet_AS201008_IPv6	2659	10816	Oliveira (2008)	link
internet_AS201009_IPv4	36290	115341	Oliveira (2008)	link
internet_AS201009_IPv6	2783	11230	Oliveira (2008)	link
internet_AS201010_IPv4	36378	114224	Oliveira (2008)	link
internet_AS201010_IPv6	2887	12281	Oliveira (2008)	link
internet_AS201011_IPv4	37154	118749	Oliveira (2008)	link
internet_AS201011_IPv6	3011	13308	Oliveira (2008)	link
internet_AS201012_IPv4	36933	119390	Oliveira (2008)	link
internet_AS201012_IPv6	3182	14105	Oliveira (2008)	link
internet_AS201101_IPv4	37157	118943	Oliveira (2008)	link
internet_AS201101_IPv6	3276	15332	Oliveira (2008)	link
internet_AS201102_IPv4	37466	120985	Oliveira (2008)	link
internet_AS201102_IPv6	3537	16390	Oliveira (2008)	link
internet_AS201103_IPv4	37833	125500	Oliveira (2008)	link
internet_AS201103_IPv6	3833	17987	Oliveira (2008)	link
internet_AS201104_IPv4	38154	127716	Oliveira (2008)	link
internet_AS201104_IPv6	3980	18747	Oliveira (2008)	link
internet_AS201105_IPv4	38442	129845	Oliveira (2008)	link
internet_AS201105_IPv6	4302	19748	Oliveira (2008)	link
internet_AS201106_IPv4	38752	135040	Oliveira (2008)	link
internet_AS201106_IPv6	4618	21559	Oliveira (2008)	link
internet_AS201107_IPv4	39076	133438	Oliveira (2008)	link
internet_AS201107_IPv6	4740	22567	Oliveira (2008)	link
internet_AS201108_IPv4	39410	134233	Oliveira (2008)	link
internet_AS201108_IPv6	4837	22294	Oliveira (2008)	link
internet_AS201109_IPv4	39668	135512	Oliveira (2008)	link
internet_AS201109_IPv6	4950	23679	Oliveira (2008)	link
internet_AS201110_IPv4	39974	137142	Oliveira (2008)	link
internet_AS201110_IPv6	5081	23764	Oliveira (2008)	link
internet_AS201111_IPv4	40272	141803	Oliveira (2008)	link
internet_AS201111_IPv6	5194	23968	Oliveira (2008)	link
internet_AS201112_IPv4	40479	139640	Oliveira (2008)	link
internet_AS201112_IPv6	5264	24942	Oliveira (2008)	link
internet_AS201201_IPv4	40679	140882	Oliveira (2008)	link
internet_AS201201_IPv6	5361	25343	Oliveira (2008)	link
internet_AS201202_IPv4	41022	145800	Oliveira (2008)	link
internet_AS201202_IPv6	5475	25584	Oliveira (2008)	link
internet_AS201203_IPv4	41429	148852	Oliveira (2008)	link
internet_AS201203_IPv6	5665	26306	Oliveira (2008)	link
internet_AS201204_IPv4	41608	149053	Oliveira (2008)	link
internet_AS201204_IPv6	5842	26397	Oliveira (2008)	link
internet_AS201205_IPv4	41923	151222	Oliveira (2008)	link
internet_AS201205_IPv6	5930	27886	Oliveira (2008)	link
internet_AS201206_IPv4	42237	150951	Oliveira (2008)	link
internet_AS201206_IPv6	6100	28172	Oliveira (2008)	link
internet_AS201207_IPv4	42446	151156	Oliveira (2008)	link
internet_AS201207_IPv6	6216	30077	Oliveira (2008)	link
internet_AS201208_IPv4	42743	159960	Oliveira (2008)	link
internet_AS201208_IPv6	6354	31886	Oliveira (2008)	link
internet_AS201209_IPv4	42995	164055	Oliveira (2008)	link
internet_AS201209_IPv6	6478	31751	Oliveira (2008)	link
internet_AS201210_IPv4	43283	164275	Oliveira (2008)	link
internet_AS201210_IPv6	6599	33543	Oliveira (2008)	link
internet_AS201211_IPv4	43506	163035	Oliveira (2008)	link
internet_AS201211_IPv6	6769	34854	Oliveira (2008)	link
internet_AS201212_IPv4	43641	160606	Oliveira (2008)	link
internet_AS201212_IPv6	6867	34363	Oliveira (2008)	link
internet_AS201301_IPv4	43915	161871	Oliveira (2008)	link
internet_AS201301_IPv6	7021	36708	Oliveira (2008)	link
internet_AS201302_IPv4	44155	165606	Oliveira (2008)	link
internet_AS201302_IPv6	7119	38469	Oliveira (2008)	link
internet_AS201303_IPv4	44447	168496	Oliveira (2008)	link
internet_AS201303_IPv6	7291	39810	Oliveira (2008)	link
internet_AS201304_IPv4	44729	170735	Oliveira (2008)	link
internet_AS201304_IPv6	7399	41428	Oliveira (2008)	link
internet_AS201305_IPv4	44961	175313	Oliveira (2008)	link
internet_AS201305_IPv6	7469	41609	Oliveira (2008)	link
internet_AS201306_IPv4	45239	174862	Oliveira (2008)	link
internet_AS201306_IPv6	7607	43594	Oliveira (2008)	link
internet_AS201307_IPv4	45457	176884	Oliveira (2008)	link
internet_AS201307_IPv6	7739	44266	Oliveira (2008)	link
internet_AS201308_IPv4	45687	177836	Oliveira (2008)	link
internet_AS201308_IPv6	7844	45420	Oliveira (2008)	link
internet_AS201309_IPv4	45765	181365	Oliveira (2008)	link
internet_AS201309_IPv6	7983	47260	Oliveira (2008)	link
internet_AS201310_IPv4	46000	185857	Oliveira (2008)	link
internet_AS201310_IPv6	8101	47604	Oliveira (2008)	link
internet_AS201311_IPv4	47031	190292	Oliveira (2008)	link
internet_AS201311_IPv6	8218	48959	Oliveira (2008)	link
internet_AS201312_IPv4	46314	187526	Oliveira (2008)	link
internet_AS201312_IPv6	8313	48672	Oliveira (2008)	link
internet_AS201401_IPv4	46528	186430	Oliveira (2008)	link
internet_AS201401_IPv6	8396	50664	Oliveira (2008)	link
internet_AS201402_IPv4	46637	193973	Oliveira (2008)	link
internet_AS201402_IPv6	8426	52092	Oliveira (2008)	link
internet_AS201403_IPv4	47022	196330	Oliveira (2008)	link
internet_AS201403_IPv6	8530	52334	Oliveira (2008)	link
internet_AS201404_IPv4	47189	195068	Oliveira (2008)	link
internet_AS201404_IPv6	8651	52405	Oliveira (2008)	link
internet_AS201405_IPv4	47470	195571	Oliveira (2008)	link
internet_AS201405_IPv6	8824	52432	Oliveira (2008)	link
internet_AS201406_IPv4	47702	197271	Oliveira (2008)	link
internet_AS201406_IPv6	8961	54658	Oliveira (2008)	link
internet_AS201407_IPv4	47979	198164	Oliveira (2008)	link
internet_AS201407_IPv6	9034	54730	Oliveira (2008)	link
internet_AS201408_IPv4	48263	204703	Oliveira (2008)	link
internet_AS201408_IPv6	9129	56105	Oliveira (2008)	link
internet_AS201409_IPv4	48587	204704	Oliveira (2008)	link
internet_AS201409_IPv6	9257	57230	Oliveira (2008)	link
internet_AS201410_IPv4	48883	210205	Oliveira (2008)	link
internet_AS201410_IPv6	9405	60505	Oliveira (2008)	link
internet_AS201411_IPv4	48982	207781	Oliveira (2008)	link
internet_AS201411_IPv6	9520	58606	Oliveira (2008)	link
internet_AS201412_IPv4	49213	210195	Oliveira (2008)	link
internet_AS201412_IPv6	9590	61542	Oliveira (2008)	link
internet_AS201501_IPv4	49448	212543	Oliveira (2008)	link
internet_AS201501_IPv6	9692	61610	Oliveira (2008)	link
internet_CAIDAAS200711_IPv4	26475	53381	Leskovec (2007)	link	AS Internet topology IPv4 snapshots from 01/2004 to 11/2007 (CAIDA Project)
internet_CAIDAAS200909_IPv4	24091	59531	Papadopoulos (2015)	link	AS Internet topology IPv4 snapshots 09/2009 (CAIDA Project)
internet_CAIDAAS200912_IPv4	25910	63435	Papadopoulos (2015)	link	AS Internet topology IPv4 snapshots 12/2009 (CAIDA Project)
internet_CAIDAAS201003_IPv4	26307	66089	Papadopoulos (2015)	link	AS Internet topology IPv4 snapshots 03/2010 (CAIDA Project)
internet_CAIDAAS201006_IPv4	26756	68150	Papadopoulos (2015)	link	AS Internet topology IPv4 snapshots 06/2010 (CAIDA Project)
internet_CAIDAAS201009_IPv4	28353	73722	Papadopoulos (2015)	link	AS Internet topology IPv4 snapshots 09/2010 (CAIDA Project)
internet_CAIDAAS201012_IPv4	29333	78054	Papadopoulos (2015)	link	AS Internet topology IPv4 snapshots 12/2010 (CAIDA Project)
internet_CAIDAAS201501_IPv4	37542	95019	Kleineberg (2016)	link	AS Internet topology IPv4 snapshots 01/2015 (CAIDA Project)
internet_CAIDAAS201501_IPv6	5143	13446	Kleineberg (2016)	link	AS Internet topology IPv6 snapshots 01/2015 (CAIDA Project)
internet_ORVPAS200001_IPv4	6474	12572	Leskovec (2007)	link	AS Internet topology IPv4 snapshots from 08/1997 to 01/2000 (Oregon Route Views Project)
internet_ORVPAS200105_IPv4	11174	23409	unpublished	link	AS Internet topology IPv6 snapshots 05/2001 (Oregon Route Views Project)
internet_ORVPAS200607_IPv4	22963	48436	unpublished	link	AS Internet topology IPv6 snapshots 07/2006 (Oregon Route Views Project)

## Sheet: misc
name	N	E	first author (year)	reference	description
citation_arxivhepph2003	34401	420784	Leskovec (2005)	link	Citation graph of scientific papers from the arXiv's High Energy Physics Phenomenology section from 01/1993 to 04/2003
citation_arxivhepth2003	27400	352021	Leskovec (2005)	link	Citation graph of scientific papers from the arXiv's High Energy Physics Theory section from 01/1993 to 04/2003
citation_citeseer	365154	1721981	Bollacker (1998)	link	Citation network extracted from the CiteSeer digital library. Nodes are publications and the directed edges denote citations.
citation_cora	23166	89157	Šubelj (2013)	link	This is the cora citation network. Nodes represent scientific papers; an edge between two nodes indicates that one node cites the other.
citation_dblp2002	12495	49563	Ley (2002)	link	Citation network of DBLP, a database of scientific publications such as papers and books. Each node in the network is a publication, and each edge represents a citation of a publication by another publication.
citation_dutchauthorscritics	35	80	Nooy (1999)	link	Critical attention network among a set of Dutch literary authors and critics in 1976. It contains an arc between two people if one has passed judgment on the work of the other in an interview or review.
citation_networkcentrality	118	613	Hummon (1990)	link	The network shows the papers that discuss network centrality and their cross-references until 1979. Arcs represent citation between nodes, which are papers.
copurchasing_amazon200306	403364	2443311	Leskovec (2007)	link	Network of items on Amazon that have been mentioned by Amazon's "customers who bought this also bought" feature. Nodes are products, and an edge denotes that products are frequently co-purchased (06/2003).
copurchasing_amazon2012	334863	925872	Yang (2012)	link	Co-purchase network of Amazon based on the "customers who bought this also bought" feature. Nodes are products and an undirected edge between two nodes shows that the corresponding products have been frequently bought together (2012).
copurchasing_polbooks	105	441	unpublished	link	Books about US politics published around the time of the 2004 presidential election and sold by the online bookseller Amazon.com. Edges between books represent frequent copurchasing of books by the same buyers
game_chess	7115	55779	unpublished	link	Results of chess games. Each node is a chess player and an edge represents a game.
game_football2000	115	613	Girvan (2002)	link	American football games between Division IA colleges during regular season Fall 2000
game_footballcontracts1998	35	118	unpublished	link	Dataset built starting from 22 soccer teams which participated in the World Championship in Paris, 1998. Players of the national team often have contracts in other countries. This constitutes a players market where national teams export players to other countries. Members of the 22 teams had contracts in altogether 35 countries.
game_tennis2017	4245	85084	Michieli (2018)	link	Network of tennis matches between 1968 and the end of August 2017. Two players are connected through an undirected and unweighted edge if they play at least one match against each other. Matches of Davis Cup, Challenger and Future torunaments are not considered.
game_tennisextended2018	22405	499057	Michieli (2018)	link	Largest possible dataset since official tennis matches have been established. It takes into account also Davis Cup, Challenger and Futures tournaments since 1991. It includes matches between 1968 and the end of March 2018.
hiring_business2013	113	2944	Clauset (2015)	link	Each node is an institution in Business and an edge (i,j) indicates that a person who received his PhD in i was hired by j (2011-2013).
hiring_computerscience2013	206	2741	Clauset (2015)	link	Each node is an institution in Computer Science and an edge (i,j) indicates that a person who received his PhD in i was hired by j (2011-2013).
hiring_history2013	145	2266	Clauset (2015)	link	Each node is an institution in History and an edge (i,j) indicates that a person who received his PhD in i was hired by j (2011-2013).
hyperlink_arabic2004	163598	1747269	unpublished	link	Arabic yperlinks network in 2004.
hyperlink_baidu2011	372840	2318025	Niu (2011)	link	"Related to" links between articles of the Chinese online encyclopedia Baidu.
hyperlink_CNR2000	325557	2738969	Boldi (2004)	link	A crawl network of hyperlinks of the Italian CNR ('Centro Nazionale di Ricerca') domain in 2000.
hyperlink_flickrimagemetadata	105722	2316668	McAuley (2012)	link	Network of Flickr images sharing common metadata such as tags, groups, locations etc. A node represents an image, and an edge indicates that two images share the same metadata.
hyperlink_google2007	15763	148585	Palla (2007)	link	Hyperlink network from pages within Google's own sites (i.e. on google.com).
hyperlink_indochina2004	11358	47606	Boldi (2011)	link	Hyperlinks network in Indochina in 2004.
hyperlink_notredame1999	325729	1090108	Albert (1999)	link	Hyperlinks network between web pages from the website of the University of Notre Dame (1999).
hyperlink_polblogs	1222	16714	Adamic (2005)	link	Hyperlinks between weblogs on US politic. Posts of 40 blogs over the period of two months preceding the U.S. Presidential Election of 2004
hyperlink_querycalifornia	5925	15770	Langville (2004)	link	Network constructed by page response set to a search engine query 'California'.
hyperlink_sk2005	121422	334419	Boldi (2011)	link	Hyperlinks network in SK in 2005.
hyperlink_spamchallenge2008	4767	37375	Castillo (2008)	link	Hyperlink network of Spam Challenge in 2008.
hyperlink_stanford2002	255265	1941926	Leskovec (2008)	link	Hyperlinks network between the web pages from the website of the Stanford University (2002).
hyperlink_uk2005	129632	11744049	Boldi (2011)	link	Hyperlinks network in UK in 2005.
hyperlink_webbase2001	16062	25593	Boldi (2011)	link	Web-base hyperlinks network in 2001.
hyperlink_wikipediaEN2013	99636	824581	Preusse (2013)	link	Evolution of hyperlinks between articles of the Simple English Wikipedia. The nodes represent articles, an edge indicates that a hyperlink was added or removed.
hyperlink_wikispeedia2012	4589	106534	West (2012)	link	Human navigation paths on Wikipedia, collected through the human-computation game Wikispeedia: users are asked to navigate from a given source to a given target article, by only clicking Wikipedia links. A condensed version of Wikipedia (4,604 articles) is used.
lexical_bible	1707	9059	Harrison (2007)	link	Nouns (places and names) of the King James Version of the Bible and information about their co-occurrences
lexical_copperfield	112	425	Newman (2006)	link	Network of common noun and adjective adjacencies for the novel "David Copperfield" by Charles Dickens. A node represents either a noun or an adjective; an edge connects two words that occur in adjacent positions.
lexical_FOLDOC	13356	91471	Batagelj(2002)	link	Cross references between entries in the FOLDOC dictionary. Nodes are entries, and an edge between two terms denotes that one term is used in the definition of the other term.
lexical_graphdigraphglossary	60	114	unpublished	link	Network based on the file glossary.html containing Bill Cherowitzo's Graph and Digraph Glossary. An arc between two terms exists in the network if in the Graph and Digraph Glossary one term is used to describe the meaning of the other.
lexical_lesmiserables	77	254	Knuth (1993)	link	Network of co-occurances of characters in Victor Hugo's novel 'Les Misérables'. A node represents a character and an edge between two nodes shows that these two characters appeared in the same chapter of the the book.
lexical_marvel	19365	96616	Alberich (2002)	link	The Marvel Universe collaboration network, where two Marvel characters are considered linked if they jointly appear in the same Marvel comic book
lexical_odlis	2898	16376	Reitz (2002)	link	Based on 'Online Dictionary of Library and Information Science (12/2000)'. An edge between two terms exists if in the ODLIS dictionary one term is used to describe the meaning of the other term.
lexical_reutersnews11september	13308	148035	Corman (2002)	link	Reuters terror news network based on all stories released during 66 consecutive days by the news agency Reuters concerning the September 11 attack on the U.S., beginning at 9:00 AM EST 11/09/2001. The vertices of a network are words (terms); there is an edge between two words if they appear in the same text unit (sentence).
lexical_roget1879	994	3640	Knuth (1993)	link	Network of cross-references in Roget's Thesaurus of English Words and Phrases, 1879. Network vertices represent categories, edges represent references between categories.
lexical_thesaurus	23132	297094	Kiss (1973)	link	Edinburgh Associative Thesaurus. Nodes are English word and words are stimuli of one another in user's experiments.
lexical_wordnet	145145	656230	Fellbaum (1998)	link	Lexical network of words from the WordNet dataset. Nodes are English words, links are relationships between them, such as synonymy, antonymy, meronymy, etc.
norm_wikipedia	1872	15367	Heaberlin (2016)	link	The evolution of Wikipedia's social norms network
phonecall_2012	193	1030	Tang (2012)	link	It consists of the logs of calls, blue-tooth scanning data and cell tower IDs of users during about ten months. If two users communicated (by making a call and sending a text message) with each other or co-occurred in the same place, we create a relationship between them.
phonecall_company2012	1984	27598	Tang (2012)	link	Nodes are employees in a company and relationships are formed by calls and short messages sent between each other during a few months. In this mobile network, each user is labeled with her/his position (such as manager or ordinary employee) in the company.
software_classcollaborationAbiWorld	1035	1719	Myers (2003)	link	Network of static class collaboration in AbiWorld (2002)
software_classcollaborationDM	162	252	Myers (2003)	link	Network of static class collaboration in Digital Material (2002)
software_classcollaborationLinux	5285	11352	Myers (2003)	link	Network of static class collaboration in Linux (2002)
software_classcollaborationMySQL	1480	4190	Myers (2003)	link	Network of static class collaboration in MySQL (2002)
software_classcollaborationVTK	771	1357	Myers (2003)	link	Network of static class collaboration in Visualization Toolkit (2002)
software_classcollaborationXMMS	971	1802	Myers (2003)	link	Network of static class collaboration in X MultiMedia System (2002)
software_javacompiletime	1538	7817	Batagelj (1998)	link	Java Compile-Time Dependency network.
software_JDK	6434	53658	Šubelj (2011)	link	Software class dependency network of the JDK 1.6.0.7 framework. Nodes represent classes; an edge between them indicates that there exists a dependency between two classes.
software_JUNGjavax	6120	50290	Šubelj (2011)	link	Software class dependency network of the JUNG 2.0.1 and javax 1.6.0.7 libraries. Nodes represent classes, an edge between them indicates that there exists a dependency between two classes.
software_linux	30817	213208	unpublished	link	Network of Linux source code files, an edge denotes that one file includes the other. The network is based on Linux version 3.16.
vote_collegecommittee	32	80	Zeleny (1950)	link	College students in a course about leadership choose which three members they wanted to have in a committee
vote_monksUSA	18	126	Breiger (1975)	link	Ratings between monks related to a crisis in a monastery in New English (USA) which lead to a departure of several of the monks. This dataset provides only one rating, which is positive if all original ratings were positive and negative if all original ratings were negative. If there were mixed opinions the rating has the value 0. A node represents a monk and an edge between two monks shows that …
vote_wikipediaEN	7066	100667	Leskovec (2010)	link	Network of users from the English Wikipedia that voted for and against each other in admin elections
vote_wikipediaRfA	11377	180980	West (2014)	link	Votes for Wikipedia editor's 'Request for Adminship' (RfA) from 2003 to 05/2013.

## Sheet: social
name	N	E	first author (year)	reference	description
coauthorship_arxivaggregated2014	8798	27416	De Domenico (2015)	link	Coauthorship network for the arXiv categories: physics.soc-ph, physics.data-an, physics.bio-ph, math.ph, math.OC, cond-mat.dis-nn, cond-mat.stat-mech, q-bio.MN, q-bio, q.-bio.BM, nlin.AO, cs.SI, cs.CV. Only included papers with "networks" in the title or abstract up to May 2014.
coauthorship_arxivastroph2003	17903	196972	Leskovec (2007)	link	Collaboration graph of authors of scientific papers from the arXiv's Astrophysics section from 01/1993 to 04/2003
coauthorship_arxivcondma1998	12722	39967	Colizza (2006)	link	Collaboration graph of authors of scientific papers from the arXiv's Condensed Matter section from 1995 to 1998
coauthorship_arxivcondma1999	13861	44619	Newman (2001)	link	Collaboration graph of authors of scientific papers from the arXiv's Condensed Matter section from 01/01/1995 to 31/12/1999
coauthorship_arxivcondma2003	21363	91286	Leskovec (2007)	link	Collaboration graph of authors of scientific papers from the arXiv's Condensed Matter section from 01/1993 to 04/2003
coauthorship_arxivcondmatdisnn2014	2121	5473	De Domenico (2015)	link	Coauthorship network for the arXiv category: cond-mat.dis-nn. Only included papers with "networks" in the title or abstract up to May 2014.
coauthorship_arxivcondmatstatmech2014	336	945	De Domenico (2015)	link	Coauthorship network for the arXiv category: cond-mat.stat-mech. Only included papers with "networks" in the title or abstract up to May 2014.
coauthorship_arxivcsSI2014	2782	8573	De Domenico (2015)	link	Coauthorship network for the arXiv category: cs.SI. Only included papers with "networks" in the title or abstract up to May 2014.
coauthorship_arxivgrqc2003	4158	13422	Leskovec (2007)	link	Collaboration graph of authors of scientific papers from the arXiv's General Relativity and Quantum Cosmology section from 01/1993 to 04/2003
coauthorship_arxivhepph2003	11204	117619	Leskovec (2007)	link	Collaboration graph of authors of scientific papers from the arXiv's High Energy Physics Phenomenology section from 01/1993 to 04/2003
coauthorship_arxivhepth2003	8638	24806	Leskovec (2007)	link	Collaboration graph of authors of scientific papers from the arXiv's High Energy Physics Theory section from 01/1993 to 04/2003
coauthorship_arxivmathOC2014	608	1664	De Domenico (2015)	link	Coauthorship network for the arXiv category: math.OC. Only included papers with "networks" in the title or abstract up to May 2014.
coauthorship_arxivnlinAO2014	396	800	De Domenico (2015)	link	Coauthorship network for the arXiv category: nlin.AO. Only included papers with "networks" in the title or abstract up to May 2014.
coauthorship_arxivphysicsbioph2014	1537	3935	De Domenico (2015)	link	Coauthorship network for the arXiv category: physics.bio-ph. Only included papers with "networks" in the title or abstract up to May 2014.
coauthorship_arxivphysicsdataan2014	3669	11969	De Domenico (2015)	link	Coauthorship network for the arXiv category: physics.data-an. Only included papers with "networks" in the title or abstract up to May 2014.
coauthorship_arxivphysicssocph2014	129	273	De Domenico (2015)	link	Coauthorship network for the arXiv category: physics.soc-ph. Only included papers with "networks" in the title or abstract up to May 2014.
coauthorship_arxivqbioBM2014	71	198	De Domenico (2015)	link	Coauthorship network for the arXiv category: q-bio.BM. Only included papers with "networks" in the title or abstract up to May 2014.
coauthorship_arxivqbioMN2014	648	1799	De Domenico (2015)	link	Coauthorship network for the arXiv category: q-bio.MN. Only included papers with "networks" in the title or abstract up to May 2014.
coauthorship_netsci2006	379	914	Newman (2006)	link	Largest component of 379 scientists co-authorship network of scientists working on network theory and experiment up until early 2006
coauthorship_pierreaugeraggregated2012	475	6426	De Domenico (2015)	link	Coauthorship network about the working tasks: 'Neutrinos', 'Detector', 'Enhancements', 'Anisotropy', 'Point-source', 'Mass-composition', 'Horizontal', 'Hybrid-reconstruction', 'Spectrum', 'Photons', 'Atmospheric', 'SD-reconstruction', 'Hadronic-interactions', 'Exotics', 'Magnetic', 'Astrophysical-scenarios' within the Pierre Auger Collaboration. We considered all submissions between 2010 and 2012.
coauthorship_pierreaugerDetector2012	83	332	De Domenico (2015)	link	Coauthorship network about the working task 'Detector' within the Pierre Auger Collaboration. We considered all submissions between 2010 and 2012.
coauthorship_pierreaugerEnhancements2012	227	5429	De Domenico (2015)	link	Coauthorship network about the working task 'Enhancements' within the Pierre Auger Collaboration. We considered all submissions between 2010 and 2012.
coauthorship_pierreaugerHybridreconstruction2012	30	110	De Domenico (2015)	link	Coauthorship network about the working task 'Hybrid-reconstruction' within the Pierre Auger Collaboration. We considered all submissions between 2010 and 2012.
coauthorship_pierreaugerSDreconstruction2012	38	102	De Domenico (2015)	link	Coauthorship network about the working task 'SD-reconstruction' within the Pierre Auger Collaboration. We considered all submissions between 2010 and 2012.
coauthorship_socialnetworksjournal	119	196	unpublished		Coauthorships in the Social Networks journal from the beginning to provide a network of networkers. The dataset records coauthorship among 475 authors who were involved in the production of 295 articles.
collaboration_actors	374511	15014839	Barabási (1999)	link	Nodes are actors and an edge exists if they both appeared in the same movie.
collaboration_businessoffice	40	238	Bernard (1980)		Network of interactions between employees in a small business office.
collaboration_fortune500IT	56	387	unpublished		Collaboration network collected in the IT Deapartment of a Fortune 500 company.
collaboration_geombib2002	3621	9461	unpublished	link	Network based on the file geombib.bib that contains Computational Geometry Database, version February 2002. Two authors are linked with an edge if they wrote a common work (paper, book, ...).
collaboration_hightechUS	21	145	Krackhardt (1987)	link	Collaboration network of a high-tech equipment company on the west coast of the United States with about 100 employees and 21 managers.
collaboration_hightechUSperception	17	36	Krackhardt (1987)	link	Perception of the collaboration network in a high-tech, machine manufacturing firm to assess the effects of a recent management intervention program. The employees were asked: ' Who do you think will help you in your job?'
collaboration_interlockscotland1905	217	348	Scott (1980)	link	This dataset contains the corporate interlocks in Scotland in the beginning of the twentieth century (1904-5). Joint stock companies are owned by the shareholders, who are represented by a board of directors. This opens up the possibility of interlocking directorates. The data are taken from the book The Anatomy of Scottish Capital by John Scott and Michael Hughes. It lists the (136) multiple dir…
collaboration_jazz	198	2742	Gleiser (2003)	link	Collaboration network between Jazz musicians. Each node is a Jazz musician and an edge denotes that two musicians have played together in a band.
collaboration_lawfirmnewengland	71	717	Lazega (2001)	link	Network study of corporate law partnership that was carried out in a Northeastern US corporate law firm, referred to as SG&R, 1988-1991 in New England. It includes measurements of networks among the 71 attorneys (partners and associates) of this firm, i.e. their strong-coworker network, advice network, friendship network, and indirect control networks.
collaboration_mentoringINSNA	60	94	Reitz (1989)	link	Network of mentoring relationships among the 60 founding members of the International Network for Social Network Analysis (INSNA) in 1977, as measured by social survey methods
collaboration_mexicoelection1929	35	117	Mendieta (1996)	link	The network contains the core of the political elite in the presidential election in 1929 in Mexico: the presidents and their closest collaborators. In this network, edges represent significant political, kinship, friendship, or business ties.
collaboration_opsahl10	77	1341	Cross (2004)	link	Intra-organizational network from a research team in a manufacturing company (77 employees). Information-sharing network
collaboration_opsahl11	77	1344	Cross (2004)	link	Intra-organizational network from a research team in a manufacturing company (77 employees). Awareness of each others’ knowledge and skills network
collaboration_opsahl8	46	550	Cross (2004)	link	Intra-organizational network from a consulting company (46 employees). Information or advice network in the past 3 months.
collaboration_opsahl9	46	505	Cross (2004)	link	Intra-organizational network from a consulting company (46 employees). Related-work network
collaboration_physicians1966	117	465	Coleman (1957)	link	Innovation spread among physicians in the towns in Illinois, Peoria, Bloomington, Quincy and Galesburg (1966). A node represents a physician, an edge between two physicians shows they are friends or collaborators.
collaboration_pressreleasesUSsenators	92	477	Justin Grimmer	unpublished	Network of instances of joint press releases issued by U. S. Senators.
collaboration_reasearchgroupwestvirginia	34	175	Bernard (1980)		Network of interactions in a technical research group at a West Virginia university.
collaboration_sawmillemployees	36	62	Michael (1997)	link	Communication structure among the employees in a wood-processing facility (sawmill). Each employee is asked to indicate the frequency in which they speak with each of their colleagues on a 5-point scale, ranging from 'almost never' (less then once per week) to 'very often' (several times per day). The network is formed using three as a cut-off value. If at least one of two persons indicated that …
contact_ACM2009	113	2196	Isella (2010)	link	Face-to-face contacts (active for at least 20 seconds) of the attendees of the ACM Conference on Hypertext and Hypermedia 2009
contact_ants	16	36	Cole (1981)	link	Dominance network in an ant community. It comprises 16 female Leptothorax allardycei ants over 18.2 hours in a queenright colony.
contact_attiro1948	59	128	Loomis (1953)	link	Visiting relations between families living in haciendas (farms) in a neighborhood called Attiro in the Turrialba region (a rural area in Costa Rica) in 1948. Each arc represents "frequent visits" from one family to another. The exact number of visits was not recorded.
contact_bison	26	222	Lott (1979)	link	Dominance network between American bisons in 1972 on the National Bison Range in Moiese (Montana). A node represents a bison and an edge represents dominance relations.
contact_cattle	28	205	Schein (1955)	link	Dominance behaviours observed between dairy cattles at the Iberia Livestock Experiment Station in Jenerette, Louisiana. A node represents a cattle and an edge represents dominance relation.
contact_collegewestvirginia	58	967	Bernard (1980)	link	Network of interactions among students living in a fraternity at a West Virginia college.
contact_CSAarhusaggregated	61	353	Magnani (2013)	link	Contact network of various relationships (lunch, Facebook, coauthorship, leisure, work) between the employees of Computer Science department at Aarhus.
contact_dolphins	62	159	Lusseau (2003)	link	Frequent associations between 62 dolphins in a community living off Doubtful Sound, New Zealand.
contact_employeestailorshopzambia	39	248	Kapferer (1972)	link	Network of interactions between employees in a tailor shop in Zambia during negotiations for higher wages.
contact_highschoolmarseilles2011	126	1709	Fournet (2014)	link	Network of contacts between students in three classes of a high school during 4 days in 12/2011 in Marseilles, France.
contact_highschoolmarseilles2012	180	2220	Fournet (2014)	link	Network of contacts between students in five classes of a high school during 7 days in 11/2012 in Marseilles, France.
contact_highschoolmarseilles2013	327	5818	Mastrandrea (2015)	link	Contact network of the students of nine high-school classes during 5 days in 12/2013 in Marseilles, France. Active contacts during 20-second intervals of the data collection.
contact_hospitallyon2012	75	1139	Vanhems (2013)	link	Network of contacts between patients, patients and health-care workers (HCWs) and among HCWs in a hospital ward in Lyon, France, from 06/12/2010 to 10/12/2012. Active contacts during 20-second intervals of the data collection.
contact_householdskenya2012	47	504	Kiti (2016)	link	Network of contacts measured between members of 5 households of rural Kenya between 24/04/2012 to 12/05/2012.
contact_infectious2009	410	2765	Isella (2011)	link	Face-to-face behavior of people during the exhibition INFECTIOUS: STAY AWAY in 2009 at the Science Gallery in Dublin
contact_kangaroo	17	91	Grant (1973)	link	Interactions between free-ranging grey kangaroos. A node represents a kangaroo and an edge between two kangaroos shows that there was an interaction between them.
contact_koreafamilyplanning	35	84	Rogers (1981)	link	The network represents women in Korea discussing family planning. Edges represent a planning discussion.
contact_macaquefuscata	62	1167	Takahata (1991)	link	Dominance behaviour in a colony of 62 adult female Japanese macaques (Macaca fuscata fuscata). A node represents a macaque and an edge represents dominancerelation.
contact_macaquemulatta	16	69	Sade (1972)	link	Grooming episodes between free ranging rhesus macaques (Macaca mulatta) in Cayo Santiago during a two month period in 1963. A node represents a monkey and an edge denotes grooming relation.
contact_MIT2004	96	2539	Eagle (2006)	link	Human contact data among 100 students of the MIT, collected by the Reality Mining experiment (2004) as part of the Reality Commons project. The data was collected over 9 months using 100 mobile phones. A node represents a person; an edge indicates that the corresponding nodes had physical contact.
contact_officefrance2013	92	755	Genois (2015)	link	Network of contacts between individuals measured in an office building in France, from 24/06/2013 to 3/07/2013. Active contacts during 20-second intervals of the data collection.
contact_papuanvillage	22	39	Hage (1973)	link	Gift-givings network between households in a Papuan village. A node represents a household and an edge between two households indicates that there happened a gift-giving.
contact_phdcomputerscience	1025	1043	Johnson (1985)	link	Network of ties between Ph.D. students and their advisors in theoretical computer science.
contact_ponies	17	129	Cluton-Brock (1976)	link	Dominance network between ponies.
contact_primaryschoollyon1	236	5899	Stehle (2011)	link	Temporal network of contacts among students and teachers at a primary school in Lyon, France (10/2009). The network accumulates all contacts over the course of a single day; contacts were sampled at 20-second intervals.
contact_primaryschoollyon2	238	5539	Stehle (2011)	link	Temporal network of contacts among students and teachers at a primary school in Lyon, France (10/2009). The network accumulates all contacts over the course of a single day; contacts were sampled at 20-second intervals.
contact_reddeers	69	647	Appleby (1980)	link	Dominance network between red deers between 01/1978 to 03/1978.
contact_sanjuansur1948	75	155	Loomis (1953)	link	Visiting relations between families living in haciendas (farms) in a neighborhood called San Juan Sur in the Turrialba region (a rural area in Costa Rica) in 1948. Each arc represents "frequent visits" from one family to another. The exact number of visits was not recorded.
contact_sheep	28	235	Hass (1991)	link	Dominance relationships between 28 female bighorn sheep (Ovis canadensis) observed on the National Bison Range in western Montana (USA) in 1984. A node represents a female bighorn sheep and an edge represents dominance relation.
contact_tribes1954	16	58	Kenneth (1954)	link	This is the signed social network of tribes of the Gahuku–Gama alliance structure of the Eastern Central Highlands of New Guinea (1954). The network contains sixteen tribes connected by friendship and enmity.
contact_windsurfers1986	43	336	Freeman (1988)	link	Interpersonal contacts between windsurfers in southern California during the fall of 1986. A node represents a windsurfer and an edge between two windsurfers shows that there was a interpersonal contact.
contact_wirelesshaggle	274	2124	Chaintreau (2007)	link	Contacts between people measured by carried wireless devices. A node represents a person and an edge between two persons shows that there was a contact between them
contact_zebra	23	105	Sundaresan (2007)	link	Interactions between 28 Grévy's zebras (Equus grevyi) in Kenya. A node represents a zebra and an edge between two zebras shows an interaction between them.
email_DNC	1833	4366	unpublished	link	Network of emails in the 2016 Democratic National Committee (DNC) email leak. Nodes in the network correspond to persons in the dataset. An edge denotes that the one node sent an email to the other node.
email_DNCcorecipient	849	10384	unpublished	link	Network of people having received the same email in the 2016 Democratic National Committee (DNC) email leak. Nodes are persons, and an edge exists between two persons who received the same email.
email_enron2003	84384	295889	Klimt (2004)	link	1,148,072 emails sent between employees of Enron between 1999 and 2003. Nodes in the network are employees and edges are individual emails.
email_enron2005	182	2097	Priebe (2005)	link	An Enron email dataset has been made public by the U.S. Department of Justice. Formed by 184 employee names as well as email addresses.
email_EUinstitution	224832	339925	Leskovec (2007)	link	Network of email of a large, undisclosed European institution. Nodes represent individual persons. Edges between two persons denote that at least one email has been sent from one person to the other. Spam emails have been removed from the dataset.
email_linuxreply	24567	158164	unpublished	link	Communication network of the Linux kernel mailing list. Nodes are persons, and edges represent a reply from a user to another.
email_manufacturing	167	3250	Michalski (2011)	link	Email communication network between employees of a mid-sized manufacturing company
email_rovira	1133	5451	Guimera (2003)	link	Email communication network at the University Rovira i Virgili in Tarragona in the south of Catalonia in Spain
friendship_CSAarhuslunch	60	193	Magnani (2013)	link	Lunch relationships between the employees of Computer Science department at Aarhus.
friendship_dutchcollege	32	422	Van de Bunt (1999)	link	Friendship ratings between 32 university freshmen who mostly did not know each other before starting university. Each student was asked to rate the other student at seven different time points. A node represents a student and an edge between two students shows that one rated the other one.
friendship_frenchfinancialelite	27	88	Kadushin (1995)	link	Dataset built from the top 28 members of the French financial elite in 1990. Their who-to-whom responses to questions about who was influencential, who were members of the elite and who were friends were recorded.
friendship_highschool1958	70	274	Coleman (1964)	link	Friendships network between boys in a small highschool in Illinois. Each boy was asked once in the fall of 1957 and the spring of 1958. This dataset aggregates the results from both dates. A node represents a boy and an edge between two boys shows that one boy chose the other boy as a friend.
friendship_highschoolmarseilles2013	128	401	Mastrandrea (2015)	link	Reported friendships network of nine high-school classes in 12/2013 in Marseilles, France. An edge between two nodes means that one student reported the other as his friend.
friendship_hitechfirm	33	91	Krackhardt (1999)	link	The network contains the friendship ties among the employees of a small hi-tech computer firm which sells, installs, and maintains computer systems, which were gathered by means of the question: 'Who do you consider to be a personal friend?'. A friendship choice (arc) is only included in the network if both persons involved acknowledge it.
friendship_karate	34	78	Zachary (1997)	link	Friendship network between 34 members of a karate club at a US university in the 1970s.
friendship_prison1960	67	142	MacRae (1960)	link	Inmates in prison choose "What fellows on the tier are you closest friends with?"
friendship_researcherssocialnetwork	34	474	Freeman (1979)	link	Networks of personal relationships among the researchers studying social networks in 1978.
friendship_residencehallANU	217	1839	Freemana (1998)	link	Friendship network between residents living at a residence hall located on the Australian National University campus
friendship_sanjuansurdeaths	75	144	Loomis (1953)	link	Network whose arcs represent the answers of the (head of) families of San Juan Sur neighborhood (Turrialba region, Costa Rica, 1948) to the question: "In case of a death in the family, whom would you notify first?".
friendship_student1995	2539	10455	Moody (2001)	link	Network from a survey that took place in 1994/1995. Each student was asked to list his 5 best female and his 5 male friends. A node represents a student and an edge between two students shows that one student chose the other student as a friend.
friendship_studentVictoria	29	250	Watts (1998)	link	Proximity ratings between students from 29 seventh grade students from a school in Victoria. A node represents a student. An edge between two nodes shows that one student picked the other student as on of his preferred classemate.
friendship_supervisorsmath1950	30	61	Carlson (1965)	link	Network of the diffusion of a new mathematics method in the 1950s. The example traces the diffusion of the modern math method among school systems which combine elementary and secondary programs in Allegheny County (Pennsylvania, USA). All school superintendents who were at least two years in office were interviewed. They are the gatekeepers to educational innovation because they are in the posit…
friendship_USflyingschool	48	170	Moreno (1960)	link	48 cadets of US Army Air Forces flying school are asked to name the members of his flight group with whom he would like to fly (1948).
friendship_westscotland	48	136	Pearson (2000)	link	Friendship network data recorded for a cohort of pupils in a school in the West of Scotland ('Teenage Friends and Lifestyle Study' 1995-1997). The friendship network was formed by allowing the pupils to name up to twelve best friends.
socialnetwork_academia2011	200167	1022440	Fire (2011)	link	Academia.edu is a platform for academics to share research papers. The company's mission is to accelerate the world's research. Academics use Academia.edu to share their research, monitor deep analytics around the impact of their research, and track the research of academics they follow. 1,103,634 academics have signed up to Academia.edu, adding 1,232,565 papers and 418,798 research interests. Ac…
socialnetwork_AIDSblog2005	146	180	Gopal (2007)	link	The file AIDSBlog.txt contains an edge list for a directed graph representingthe pattern of citation among 146 unique blogs related to AIDS, patients,and their support networks, collected by Gopal over a randomly selectedthree-day period in August 2005. Vertices correspond to blogs. A directededge from one blog to another indicates that the former had a link to thelatter in their web page (more s…
socialnetwork_anybeat2012	12645	49132	Fire (2012)	link	Anybeat is an online community, a public gathering place where you can interact with people from around your neighborhood or across the world.
socialnetwork_askubuntu	152599	453221	Paranjape (2017)	link	Network of interactions on the stack exchange web site Ask Ubuntu. The interactions can be: an user anwered to another user's question, an user commented on another user's question and an user commented on another user's answer.
socialnetwork_blogcatalog	10312	333983	Wang (2010)	link	Friendship network among the users of BlogCatalog. Nodes are users, edges are friendships.
socialnetwork_brightkite2010	56739	212945	Cho (2011)	link	User–user friendship relations from Brightkite, a former location-based social network were user shared their locations. A node represents a user and an edge indicates that a friendship exists between the users (04/2008 - 10/2010).
socialnetwork_buzznet2010	101163	2763066	Zafarani (2010)	link	Buzznet is a photo, journal, and video-sharing social media network. This is the dataset crawled on 11/2010 from Buzznet. Friendship network crawled on 11/2010 from Buzznet.
socialnetwork_catster	148826	5447464	unpublished	link	Friendships network between users of the website catster.com.
socialnetwork_deezerHR2017	54573	498202	Rozemberczki (2018)	link	Friendship network of Croatian Deezer as of 11/2017. Nodes represent the users and edges are the mutual friendships.
socialnetwork_deezerHU2017	47538	222887	Rozemberczki (2018)	link	Friendship network of Hungarian Deezer as of 11/2017. Nodes represent the users and edges are the mutual friendships.
socialnetwork_deezerRO2017	41773	125826	Rozemberczki (2018)	link	Friendship network of Romanian Deezer as of 11/2017. Nodes represent the users and edges are the mutual friendships.
socialnetwork_delicious2010	536108	1365961	Zafarani (2010)	link	Delicious is a social bookmarking web service for storing, sharing, and discovering web bookmarks. Friendship network crawled in 12/2010.
socialnetwork_digg2009	261489	1536577	Hogg (2012)	link	Friendship network of Digg (2009).
socialnetwork_digg2010	770799	5907132	Zafarani (2010)	link	Digg is a social news website. Friendship network crawled in 12/2010.
socialnetwork_diggreply	29652	84781	De Choudhury (2009)	link	Reply network of the social news website Digg. Each node in the network is a user of the website, and each edge denotes that a user replied to another user
socialnetwork_douban2010	154908	327162	Zafarani (2010)	link	Social network of douban, a Chinese online recommendation site (12/2010).
socialnetwork_eurosis	1272	6454	EU report (2010)	link	Interactions between Science in Society actors on the Web of 12 European countries in 2007.
socialnetwork_facebook2017artists	50515	819090	Rozemberczki (2018)	link	Network of Facebook pages as of 11/2017. Nodes represent pages of 'Artists' and edges are mutual likes among them.
socialnetwork_facebook2017athletes	13866	86811	Rozemberczki (2018)	link	Network of Facebook pages as of 11/2017. Nodes represent pages of 'Athletes' and edges are mutual likes among them.
socialnetwork_facebook2017companies	14113	52126	Rozemberczki (2018)	link	Network of Facebook pages as of 11/2017. Nodes represent pages of 'Companies' and edges are mutual likes among them.
socialnetwork_facebook2017government	7057	89429	Rozemberczki (2018)	link	Network of Facebook pages as of 11/2017. Nodes represent pages of 'Government' and edges are mutual likes among them.
socialnetwork_facebook2017newsites	27917	205964	Rozemberczki (2018)	link	Network of Facebook pages as of 11/2017. Nodes represent pages of 'New Sites' and edges are mutual likes among them.
socialnetwork_facebook2017politicians	5908	41706	Rozemberczki (2018)	link	Network of Facebook pages as of 11/2017. Nodes represent pages of 'Politicians' and edges are mutual likes among them.
socialnetwork_facebook2017publicfigures	11565	67038	Rozemberczki (2018)	link	Network of Facebook pages as of 11/2017. Nodes represent pages of 'Public Figures' and edges are mutual likes among them.
socialnetwork_facebook2017TVshows	3892	17239	Rozemberczki (2018)	link	Network of Facebook pages as of 11/2017. Nodes represent pages of 'TV Shows' and edges are mutual likes among them.
socialnetwork_facebookcollege_American75	6370	217654	Traud (2012)	link	Snapshots of within-college social networks of the first 100 colleges and universities admitted to thefacebook.com, in 09/2005.
socialnetwork_facebookcollege_Amherst41	2235	90954	Traud (2012)	link	Snapshots of within-college social networks of the first 100 colleges and universities admitted to thefacebook.com, in 09/2005.
socialnetwork_facebookcollege_Auburn71	18448	973918	Traud (2012)	link	Snapshots of within-college social networks of the first 100 colleges and universities admitted to thefacebook.com, in 09/2005.
socialnetwork_facebookcollege_Baylor93	12799	679815	Traud (2012)	link	Snapshots of within-college social networks of the first 100 colleges and universities admitted to thefacebook.com, in 09/2005.
socialnetwork_facebookcollege_BC17	11498	486961	Traud (2012)	link	Snapshots of within-college social networks of the first 100 colleges and universities admitted to thefacebook.com, in 09/2005.
socialnetwork_facebookcollege_Berkeley13	22900	852419	Traud (2012)	link	Snapshots of within-college social networks of the first 100 colleges and universities admitted to thefacebook.com, in 09/2005.
socialnetwork_facebookcollege_Bingham82	10001	362892	Traud (2012)	link	Snapshots of within-college social networks of the first 100 colleges and universities admitted to thefacebook.com, in 09/2005.
socialnetwork_facebookcollege_Bowdoin47	2250	84386	Traud (2012)	link	Snapshots of within-college social networks of the first 100 colleges and universities admitted to thefacebook.com, in 09/2005.
socialnetwork_facebookcollege_Brandeis99	3887	137561	Traud (2012)	link	Snapshots of within-college social networks of the first 100 colleges and universities admitted to thefacebook.com, in 09/2005.
socialnetwork_facebookcollege_Brown11	8586	384519	Traud (2012)	link	Snapshots of within-college social networks of the first 100 colleges and universities admitted to thefacebook.com, in 09/2005.
socialnetwork_facebookcollege_BU10	19666	637509	Traud (2012)	link	Snapshots of within-college social networks of the first 100 colleges and universities admitted to thefacebook.com, in 09/2005.
socialnetwork_facebookcollege_Bucknell39	3824	158863	Traud (2012)	link	Snapshots of within-college social networks of the first 100 colleges and universities admitted to thefacebook.com, in 09/2005.
socialnetwork_facebookcollege_Cal65	11243	351356	Traud (2012)	link	Snapshots of within-college social networks of the first 100 colleges and universities admitted to thefacebook.com, in 09/2005.
socialnetwork_facebookcollege_Caltech36	762	16651	Traud (2012)	link	Snapshots of within-college social networks of the first 100 colleges and universities admitted to thefacebook.com, in 09/2005.
socialnetwork_facebookcollege_Carnegie49	6621	249959	Traud (2012)	link	Snapshots of within-college social networks of the first 100 colleges and universities admitted to thefacebook.com, in 09/2005.
socialnetwork_facebookcollege_Colgate88	3482	155043	Traud (2012)	link	Snapshots of within-college social networks of the first 100 colleges and universities admitted to thefacebook.com, in 09/2005.
socialnetwork_facebookcollege_Columbia2	11706	444295	Traud (2012)	link	Snapshots of within-college social networks of the first 100 colleges and universities admitted to thefacebook.com, in 09/2005.
socialnetwork_facebookcollege_Cornell5	18621	790753	Traud (2012)	link	Snapshots of within-college social networks of the first 100 colleges and universities admitted to thefacebook.com, in 09/2005.
socialnetwork_facebookcollege_Dartmouth6	7677	304065	Traud (2012)	link	Snapshots of within-college social networks of the first 100 colleges and universities admitted to thefacebook.com, in 09/2005.
socialnetwork_facebookcollege_Duke14	9885	506437	Traud (2012)	link	Snapshots of within-college social networks of the first 100 colleges and universities admitted to thefacebook.com, in 09/2005.
socialnetwork_facebookcollege_Emory27	7449	330008	Traud (2012)	link	Snapshots of within-college social networks of the first 100 colleges and universities admitted to thefacebook.com, in 09/2005.
socialnetwork_facebookcollege_FSU53	27731	1034799	Traud (2012)	link	Snapshots of within-college social networks of the first 100 colleges and universities admitted to thefacebook.com, in 09/2005.
socialnetwork_facebookcollege_Georgetown15	9388	425619	Traud (2012)	link	Snapshots of within-college social networks of the first 100 colleges and universities admitted to thefacebook.com, in 09/2005.
socialnetwork_facebookcollege_GWU54	12164	469511	Traud (2012)	link	Snapshots of within-college social networks of the first 100 colleges and universities admitted to thefacebook.com, in 09/2005.
socialnetwork_facebookcollege_Hamilton46	2312	96393	Traud (2012)	link	Snapshots of within-college social networks of the first 100 colleges and universities admitted to thefacebook.com, in 09/2005.
socialnetwork_facebookcollege_Harvard1	15086	824595	Traud (2012)	link	Snapshots of within-college social networks of the first 100 colleges and universities admitted to thefacebook.com, in 09/2005.
socialnetwork_facebookcollege_Haverford76	1446	59589	Traud (2012)	link	Snapshots of within-college social networks of the first 100 colleges and universities admitted to thefacebook.com, in 09/2005.
socialnetwork_facebookcollege_Howard90	4047	204850	Traud (2012)	link	Snapshots of within-college social networks of the first 100 colleges and universities admitted to thefacebook.com, in 09/2005.
socialnetwork_facebookcollege_Indiana69	29732	1305757	Traud (2012)	link	Snapshots of within-college social networks of the first 100 colleges and universities admitted to thefacebook.com, in 09/2005.
socialnetwork_facebookcollege_JMU79	14070	485564	Traud (2012)	link	Snapshots of within-college social networks of the first 100 colleges and universities admitted to thefacebook.com, in 09/2005.
socialnetwork_facebookcollege_Johns Hopkins55	5157	186572	Traud (2012)	link	Snapshots of within-college social networks of the first 100 colleges and universities admitted to thefacebook.com, in 09/2005.
socialnetwork_facebookcollege_Lehigh96	5073	198346	Traud (2012)	link	Snapshots of within-college social networks of the first 100 colleges and universities admitted to thefacebook.com, in 09/2005.
socialnetwork_facebookcollege_Maine59	9065	243245	Traud (2012)	link	Snapshots of within-college social networks of the first 100 colleges and universities admitted to thefacebook.com, in 09/2005.
socialnetwork_facebookcollege_Maryland58	20829	744832	Traud (2012)	link	Snapshots of within-college social networks of the first 100 colleges and universities admitted to thefacebook.com, in 09/2005.
socialnetwork_facebookcollege_Mich67	3745	81901	Traud (2012)	link	Snapshots of within-college social networks of the first 100 colleges and universities admitted to thefacebook.com, in 09/2005.
socialnetwork_facebookcollege_Michigan23	30106	1176489	Traud (2012)	link	Snapshots of within-college social networks of the first 100 colleges and universities admitted to thefacebook.com, in 09/2005.
socialnetwork_facebookcollege_Middlebury45	3069	124607	Traud (2012)	link	Snapshots of within-college social networks of the first 100 colleges and universities admitted to thefacebook.com, in 09/2005.
socialnetwork_facebookcollege_Mississippi66	10519	610910	Traud (2012)	link	Snapshots of within-college social networks of the first 100 colleges and universities admitted to thefacebook.com, in 09/2005.
socialnetwork_facebookcollege_MIT8	6402	251230	Traud (2012)	link	Snapshots of within-college social networks of the first 100 colleges and universities admitted to thefacebook.com, in 09/2005.
socialnetwork_facebookcollege_MSU24	32361	1118767	Traud (2012)	link	Snapshots of within-college social networks of the first 100 colleges and universities admitted to thefacebook.com, in 09/2005.
socialnetwork_facebookcollege_MU78	15425	649441	Traud (2012)	link	Snapshots of within-college social networks of the first 100 colleges and universities admitted to thefacebook.com, in 09/2005.
socialnetwork_facebookcollege_Northeastern19	13868	381919	Traud (2012)	link	Snapshots of within-college social networks of the first 100 colleges and universities admitted to thefacebook.com, in 09/2005.
socialnetwork_facebookcollege_Northwestern25	10537	488318	Traud (2012)	link	Snapshots of within-college social networks of the first 100 colleges and universities admitted to thefacebook.com, in 09/2005.
socialnetwork_facebookcollege_Notre Dame57	12149	541336	Traud (2012)	link	Snapshots of within-college social networks of the first 100 colleges and universities admitted to thefacebook.com, in 09/2005.
socialnetwork_facebookcollege_NYU9	21623	715673	Traud (2012)	link	Snapshots of within-college social networks of the first 100 colleges and universities admitted to thefacebook.com, in 09/2005.
socialnetwork_facebookcollege_Oberlin44	2920	89912	Traud (2012)	link	Snapshots of within-college social networks of the first 100 colleges and universities admitted to thefacebook.com, in 09/2005.
socialnetwork_facebookcollege_Oklahoma97	17420	892524	Traud (2012)	link	Snapshots of within-college social networks of the first 100 colleges and universities admitted to thefacebook.com, in 09/2005.
socialnetwork_facebookcollege_Penn94	41536	1362220	Traud (2012)	link	Snapshots of within-college social networks of the first 100 colleges and universities admitted to thefacebook.com, in 09/2005.
socialnetwork_facebookcollege_Pepperdine86	3440	152003	Traud (2012)	link	Snapshots of within-college social networks of the first 100 colleges and universities admitted to thefacebook.com, in 09/2005.
socialnetwork_facebookcollege_Princeton12	6575	293307	Traud (2012)	link	Snapshots of within-college social networks of the first 100 colleges and universities admitted to thefacebook.com, in 09/2005.
socialnetwork_facebookcollege_Reed98	962	18812	Traud (2012)	link	Snapshots of within-college social networks of the first 100 colleges and universities admitted to thefacebook.com, in 09/2005.
socialnetwork_facebookcollege_Rice31	4083	184826	Traud (2012)	link	Snapshots of within-college social networks of the first 100 colleges and universities admitted to thefacebook.com, in 09/2005.
socialnetwork_facebookcollege_Rochester38	4561	161403	Traud (2012)	link	Snapshots of within-college social networks of the first 100 colleges and universities admitted to thefacebook.com, in 09/2005.
socialnetwork_facebookcollege_Rutgers89	24568	784596	Traud (2012)	link	Snapshots of within-college social networks of the first 100 colleges and universities admitted to thefacebook.com, in 09/2005.
socialnetwork_facebookcollege_Santa74	3578	151747	Traud (2012)	link	Snapshots of within-college social networks of the first 100 colleges and universities admitted to thefacebook.com, in 09/2005.
socialnetwork_facebookcollege_Simmons81	1510	32984	Traud (2012)	link	Snapshots of within-college social networks of the first 100 colleges and universities admitted to thefacebook.com, in 09/2005.
socialnetwork_facebookcollege_Smith60	2970	97133	Traud (2012)	link	Snapshots of within-college social networks of the first 100 colleges and universities admitted to thefacebook.com, in 09/2005.
socialnetwork_facebookcollege_Stanford3	11586	568309	Traud (2012)	link	Snapshots of within-college social networks of the first 100 colleges and universities admitted to thefacebook.com, in 09/2005.
socialnetwork_facebookcollege_Swarthmore42	1657	61049	Traud (2012)	link	Snapshots of within-college social networks of the first 100 colleges and universities admitted to thefacebook.com, in 09/2005.
socialnetwork_facebookcollege_Syracuse56	13640	543975	Traud (2012)	link	Snapshots of within-college social networks of the first 100 colleges and universities admitted to thefacebook.com, in 09/2005.
socialnetwork_facebookcollege_Temple83	13653	360774	Traud (2012)	link	Snapshots of within-college social networks of the first 100 colleges and universities admitted to thefacebook.com, in 09/2005.
socialnetwork_facebookcollege_Tennessee95	16977	770658	Traud (2012)	link	Snapshots of within-college social networks of the first 100 colleges and universities admitted to thefacebook.com, in 09/2005.
socialnetwork_facebookcollege_Texas80	31538	1219639	Traud (2012)	link	Snapshots of within-college social networks of the first 100 colleges and universities admitted to thefacebook.com, in 09/2005.
socialnetwork_facebookcollege_Texas84	36364	1590651	Traud (2012)	link	Snapshots of within-college social networks of the first 100 colleges and universities admitted to thefacebook.com, in 09/2005.
socialnetwork_facebookcollege_Trinity100	2613	111996	Traud (2012)	link	Snapshots of within-college social networks of the first 100 colleges and universities admitted to thefacebook.com, in 09/2005.
socialnetwork_facebookcollege_Tufts18	6672	249722	Traud (2012)	link	Snapshots of within-college social networks of the first 100 colleges and universities admitted to thefacebook.com, in 09/2005.
socialnetwork_facebookcollege_Tulane29	7740	283912	Traud (2012)	link	Snapshots of within-college social networks of the first 100 colleges and universities admitted to thefacebook.com, in 09/2005.
socialnetwork_facebookcollege_UC33	16800	522141	Traud (2012)	link	Snapshots of within-college social networks of the first 100 colleges and universities admitted to thefacebook.com, in 09/2005.
socialnetwork_facebookcollege_UC61	13736	442169	Traud (2012)	link	Snapshots of within-college social networks of the first 100 colleges and universities admitted to thefacebook.com, in 09/2005.
socialnetwork_facebookcollege_UC64	6810	155320	Traud (2012)	link	Snapshots of within-college social networks of the first 100 colleges and universities admitted to thefacebook.com, in 09/2005.
socialnetwork_facebookcollege_UCF52	14936	428987	Traud (2012)	link	Snapshots of within-college social networks of the first 100 colleges and universities admitted to thefacebook.com, in 09/2005.
socialnetwork_facebookcollege_UChicago30	6561	208088	Traud (2012)	link	Snapshots of within-college social networks of the first 100 colleges and universities admitted to thefacebook.com, in 09/2005.
socialnetwork_facebookcollege_UCLA26	20453	747604	Traud (2012)	link	Snapshots of within-college social networks of the first 100 colleges and universities admitted to thefacebook.com, in 09/2005.
socialnetwork_facebookcollege_UConn91	17206	604867	Traud (2012)	link	Snapshots of within-college social networks of the first 100 colleges and universities admitted to thefacebook.com, in 09/2005.
socialnetwork_facebookcollege_UCSB37	14917	482215	Traud (2012)	link	Snapshots of within-college social networks of the first 100 colleges and universities admitted to thefacebook.com, in 09/2005.
socialnetwork_facebookcollege_UCSC68	8979	224578	Traud (2012)	link	Snapshots of within-college social networks of the first 100 colleges and universities admitted to thefacebook.com, in 09/2005.
socialnetwork_facebookcollege_UCSD34	14936	443215	Traud (2012)	link	Snapshots of within-college social networks of the first 100 colleges and universities admitted to thefacebook.com, in 09/2005.
socialnetwork_facebookcollege_UF21	35111	1465654	Traud (2012)	link	Snapshots of within-college social networks of the first 100 colleges and universities admitted to thefacebook.com, in 09/2005.
socialnetwork_facebookcollege_UGA50	24380	1174051	Traud (2012)	link	Snapshots of within-college social networks of the first 100 colleges and universities admitted to thefacebook.com, in 09/2005.
socialnetwork_facebookcollege_UIllinois20	30795	1264421	Traud (2012)	link	Snapshots of within-college social networks of the first 100 colleges and universities admitted to thefacebook.com, in 09/2005.
socialnetwork_facebookcollege_UMass92	16502	519376	Traud (2012)	link	Snapshots of within-college social networks of the first 100 colleges and universities admitted to thefacebook.com, in 09/2005.
socialnetwork_facebookcollege_UNC28	18158	766796	Traud (2012)	link	Snapshots of within-college social networks of the first 100 colleges and universities admitted to thefacebook.com, in 09/2005.
socialnetwork_facebookcollege_UPenn7	14888	686485	Traud (2012)	link	Snapshots of within-college social networks of the first 100 colleges and universities admitted to thefacebook.com, in 09/2005.
socialnetwork_facebookcollege_USC35	17440	801851	Traud (2012)	link	Snapshots of within-college social networks of the first 100 colleges and universities admitted to thefacebook.com, in 09/2005.
socialnetwork_facebookcollege_USF51	13367	321209	Traud (2012)	link	Snapshots of within-college social networks of the first 100 colleges and universities admitted to thefacebook.com, in 09/2005.
socialnetwork_facebookcollege_USFCA72	2672	65244	Traud (2012)	link	Snapshots of within-college social networks of the first 100 colleges and universities admitted to thefacebook.com, in 09/2005.
socialnetwork_facebookcollege_UVA16	17178	789308	Traud (2012)	link	Snapshots of within-college social networks of the first 100 colleges and universities admitted to thefacebook.com, in 09/2005.
socialnetwork_facebookcollege_Vanderbilt48	8063	427829	Traud (2012)	link	Snapshots of within-college social networks of the first 100 colleges and universities admitted to thefacebook.com, in 09/2005.
socialnetwork_facebookcollege_Vassar85	3068	119161	Traud (2012)	link	Snapshots of within-college social networks of the first 100 colleges and universities admitted to thefacebook.com, in 09/2005.
socialnetwork_facebookcollege_Vermont70	7322	191220	Traud (2012)	link	Snapshots of within-college social networks of the first 100 colleges and universities admitted to thefacebook.com, in 09/2005.
socialnetwork_facebookcollege_Villanova62	7755	314980	Traud (2012)	link	Snapshots of within-college social networks of the first 100 colleges and universities admitted to thefacebook.com, in 09/2005.
socialnetwork_facebookcollege_Virginia63	21319	698175	Traud (2012)	link	Snapshots of within-college social networks of the first 100 colleges and universities admitted to thefacebook.com, in 09/2005.
socialnetwork_facebookcollege_Wake73	5366	279186	Traud (2012)	link	Snapshots of within-college social networks of the first 100 colleges and universities admitted to thefacebook.com, in 09/2005.
socialnetwork_facebookcollege_WashU32	7730	367526	Traud (2012)	link	Snapshots of within-college social networks of the first 100 colleges and universities admitted to thefacebook.com, in 09/2005.
socialnetwork_facebookcollege_Wellesley22	2970	94899	Traud (2012)	link	Snapshots of within-college social networks of the first 100 colleges and universities admitted to thefacebook.com, in 09/2005.
socialnetwork_facebookcollege_Wesleyan43	3591	138034	Traud (2012)	link	Snapshots of within-college social networks of the first 100 colleges and universities admitted to thefacebook.com, in 09/2005.
socialnetwork_facebookcollege_William77	6472	266378	Traud (2012)	link	Snapshots of within-college social networks of the first 100 colleges and universities admitted to thefacebook.com, in 09/2005.
socialnetwork_facebookcollege_Williams40	2788	112985	Traud (2012)	link	Snapshots of within-college social networks of the first 100 colleges and universities admitted to thefacebook.com, in 09/2005.
socialnetwork_facebookcollege_Wisconsin87	23831	835946	Traud (2012)	link	Snapshots of within-college social networks of the first 100 colleges and universities admitted to thefacebook.com, in 09/2005.
socialnetwork_facebookcollege_Yale4	8561	405440	Traud (2012)	link	Snapshots of within-college social networks of the first 100 colleges and universities admitted to thefacebook.com, in 09/2005.
socialnetwork_facebookCSAarhus	32	124	Magnani (2013)	link	Facebook relationships between the employees of Computer Science department at Aarhus.
socialnetwork_facebookhighschoolmarseilles2013	156	1437	Mastrandrea (2015)	link	Facebook friendship network of nine high-school classes in 12/2013 in Marseilles, France. Each line has the form “i j w”, where w=1 means that students i and j are linked on Facebook, while w=0 means that they are not.
socialnetwork_facebookNOlinks	63392	816886	Viswanath (2009)	link	Small subset of user-to-user links on Facebook New Orleans.
socialnetwork_facebookNOposts	43953	182384	Viswanath (2009)	link	Small subset of posts to other user's wall on Facebook New Orleans.
socialnetwork_flickr	80513	5899882	Tang (2009)	link	Friendship network dataset crawled from Flickr. Nodes are users and edges denote friendship between them
socialnetwork_foursquare2010	639014	3214986	Zafarani (2010)	link	Foursquare is a location-based social networking website, software for mobile devices. This service is available to users with GPS enabled mobile devices. Friendship network crawled in 12/2010.
socialnetwork_gnutella20020804	10876	39994	Leskovec (2007)	link	Snapshot of the Gnutella peer-to-peer file sharing network on 04/08/2002. Nodes represent hosts in the Gnutella network topology and edges represent connections between the Gnutella hosts.
socialnetwork_gnutella20020805	8842	31837	Leskovec (2007)	link	Snapshot of the Gnutella peer-to-peer file sharing network on 05/08/2002. Nodes represent hosts in the Gnutella network topology and edges represent connections between the Gnutella hosts.
socialnetwork_gnutella20020806	8717	31525	Leskovec (2007)	link	Snapshot of the Gnutella peer-to-peer file sharing network on 06/08/2002. Nodes represent hosts in the Gnutella network topology and edges represent connections between the Gnutella hosts.
socialnetwork_gnutella20020808	6299	20776	Leskovec (2007)	link	Snapshot of the Gnutella peer-to-peer file sharing network on 08/08/2002. Nodes represent hosts in the Gnutella network topology and edges represent connections between the Gnutella hosts.
socialnetwork_gnutella20020809	8104	26008	Leskovec (2007)	link	Snapshot of the Gnutella peer-to-peer file sharing network on 09/08/2002. Nodes represent hosts in the Gnutella network topology and edges represent connections between the Gnutella hosts.
socialnetwork_gnutella20020824	26498	65359	Leskovec (2007)	link	Snapshot of the Gnutella peer-to-peer file sharing network on 24/08/2002. Nodes represent hosts in the Gnutella network topology and edges represent connections between the Gnutella hosts.
socialnetwork_gnutella20020825	22663	54693	Leskovec (2007)	link	Snapshot of the Gnutella peer-to-peer file sharing network on 25/08/2002. Nodes represent hosts in the Gnutella network topology and edges represent connections between the Gnutella hosts.
socialnetwork_gnutella20020831	62561	147878	Leskovec (2007)	link	Snapshot of the Gnutella peer-to-peer file sharing network on 31/08/2002. Nodes represent hosts in the Gnutella network topology and edges represent connections between the Gnutella hosts.
socialnetwork_googleplus	201949	1133956	McAuley (2012)	link	Google+ user–user links. A node represents a user, and an edge denotes that one user has the other user in his circles.
socialnetwork_gowalla2010	196591	950327	Cho (2011)	link	Network of user–user friendship relations from Gowalla, a former location-based social network where user shared their locations. A node represents a user and an edge indicates that a friendship exists between the users (02/2009 - 10/2010).
socialnetwork_hamstersterfriends	1788	12476	unpublished	link	Friendships between users of the website hamsterster.com
socialnetwork_hamstersterfriendsfamily	2000	16098	unpublished	link	Friendships and familylinks between users of the website hamsterster.com
socialnetwork_lastfmfriendship	976658	3151228	Schifanella (2010)	link	It contains a fraction of the Last.fm social network. Each line suggests that id_userA is a friend of id_userB and viceversa. Note that the Last.fm friendship relation IS symmetric.
socialnetwork_libimseti2006	220970	17233144	Kunegis(2012)	link	Network of ratings given by users of Libimseti.cz (a Czech dating site) to other users (04/04/2006).
socialnetwork_livemocha2010	104103	2193083	Zafarani (2010)	link	Social network of Livemocha, an online language learning community. Friendship network crawled in 12/2010.
socialnetwork_mathoverflow	24668	187939	Paranjape (2017)	link	Network of interactions on the stack exchange web site Math Overflow. The interactions can be: an user anwered to another user's question, an user commented on another user's question and an user commented on another user's answer.
socialnetwork_PGP2004	10680	24316	Boguña (2004)	link	Network formed by people that shares confidential information using the Pretty Good Privacy (PGP) encryption algorithm ('web of trust of PGP')
socialnetwork_PGP2009	39796	197150	Richters (2011)	link	Network formed by people that shares confidential information using the Pretty Good Privacy (PGP) encryption algorithm ('web of trust of PGP'). Dataset as of 11/2009.
socialnetwork_prosper	89171	3329970		link	Loans between users of the Prosper.com website. The network is directed and denotes who loaned money to whom.
socialnetwork_slashdot200811	77360	469180	Leskovec (2009)	link	Network built from Slashdot (a technology-related news website know for its specific user community), where users can tag each other as friends or foes. The network contains those relations as in 11/2008.
socialnetwork_slashdot200902_kunegis	79116	467731	Kunegis (2009)	link	Network built from Slashdot (a technology-related news website know for its specific user community), where users can tag each other as friends or foes. The network contains those relations between 05/2008 and 02/2009.
socialnetwork_slashdot200902_leskovec	82168	504230	Leskovec (2009)	link	Network built from Slashdot (a technology-related news website know for its specific user community), where users can tag each other as friends or foes. The network contains those relations as in 02/2009.
socialnetwork_slashdotreply	51083	116573	Gómez (2008)	link	Reply network of technology website Slashdot. Nodes are users and edges are replies.
socialnetwork_superuser	189191	712870	Paranjape (2017)	link	Network of interactions on the stack exchange web site Super User. The interactions can be: an user anwered to another user's question, an user commented on another user's question and an user commented on another user's answer.
socialnetwork_surveyfacebook2012	2888	2981	McAuley (2012)	link	Networks of user–user friendships collected from a survey on Facebook. A node represents a survey participant, an edge indicates that the participants are friends.
socialnetwork_themarkercafe2011	69317	1644794	Fire (2011)	link	TheMarker Cafe is an Israelis online social network site that allows its member to connect and interact. Since most of its members are Israeli, most interaction and communication among members is done in Hebrew.
socialnetwork_twitter	81306	1342296	McAuley (2012)	link	Twitter user–user following information. A node represents a user, an edge indicates that one user follows the other.
socialnetwork_twitter2012followers	595460	14273311	Conover (2011)	link	Sampled public tweets from Twitter streaming API . Date range: March 24, 2012 to April 25, 2012. Each edge is a pair of Twitter user who are following each other.
socialnetwork_twitter2012mentions	374829	1048818	Conover (2011)	link	Sampled public tweets from Twitter streaming API . Date range: March 24, 2012 to April 25, 2012. Each edge is a pair of users who mentioned each other at least once during our observation time window
socialnetwork_twitter2012retweets	300197	598487	Conover (2011)	link	Sampled public tweets from Twitter streaming API . Date range: March 24, 2012 to April 25, 2012. Each edge is a pair of users who retweeted each other at least once during our observation time window.
socialnetwork_twitteralwefaqretweets	4171	7059	Rossi (2012)	link	Retweets network on Twitter with the hashtag: "alwefaq". Nodes are users and edges are retweets. Data collected on 20/09/2012 from Truthy.
socialnetwork_twitterassadretweets	2139	2786	Rossi (2012)	link	Retweets network on Twitter with the hashtag: "assad". Nodes are users and edges are retweets. Data collected on 20/09/2012 from Truthy.
socialnetwork_twitterathletics2013mentions	43182	87216	Omodei (2015)	link	Mentions network amoung users, obtained from Twitter during an exceptional event: the 2013 World Championships in Athletics. Start: 2013-08-05 11:25:46 End: 2013-08-19 14:35:22
socialnetwork_twitterathletics2013replies	8211	10226	Omodei (2015)	link	Replies network amoung users, obtained from Twitter during an exceptional event: the 2013 World Championships in Athletics. Start: 2013-08-05 11:25:46 End: 2013-08-19 14:35:23
socialnetwork_twitterathletics2013retweets	66475	98960	Omodei (2015)	link	Retweets network amoung users, obtained from Twitter during an exceptional event: the 2013 World Championships in Athletics. Start: 2013-08-05 11:25:46 End: 2013-08-19 14:35:21
socialnetwork_twitterbahrainretweets	4676	7977	Rossi (2012)	link	Retweets network on Twitter with the hashtag: "bahrain". Nodes are users and edges are retweets. Data collected on 20/09/2012 from Truthy.
socialnetwork_twitterbarackobamaretweets	9631	9772	Rossi (2012)	link	Retweets network on Twitter with the hashtag: "barackobama". Nodes are users and edges are retweets. Data collected on 20/09/2012 from Truthy.
socialnetwork_twittercannes2013mentions	194005	364287	Omodei (2015)	link	Mentions network amoung users, obtained from Twitter during an exceptional event: the Cannes Film Festival in 2013. Start: 2013-05-06 07:23:49 End: 2013-06-03 05:48:27
socialnetwork_twittercannes2013replies	43323	53619	Omodei (2015)	link	Replies network amoung users, obtained from Twitter during an exceptional event: the Cannes Film Festival in 2013. Start: 2013-05-06 07:23:49 End: 2013-06-03 05:48:28
socialnetwork_twittercannes2013retweets	283476	451422	Omodei (2015)	link	Retweets network amoung users, obtained from Twitter during an exceptional event: the Cannes Film Festival in 2013. Start: 2013-05-06 07:23:49 End: 2013-06-03 05:48:26
socialnetwork_twitterclimatemarch2014mentions	47947	127034	Omodei (2015)	link	Mentions network among users, obtained from Twitter during an exceptional event: the People's Climate March in 2014. Start: 2014-09-19 00:46:19. End: 2014-09-22 06:56:25
socialnetwork_twitterclimatemarch2014replies	4915	5929	Omodei (2015)	link	Replies network among users, obtained from Twitter during an exceptional event: the People's Climate March in 2014. Start: 2014-09-19 00:46:19. End: 2014-09-22 06:56:25
socialnetwork_twitterclimatemarch2014retweets	92139	211256	Omodei (2015)	link	Retweets network among users, obtained from Twitter during an exceptional event: the People's Climate March in 2014. Start: 2014-09-19 00:46:19. End: 2014-09-22 06:56:25
socialnetwork_twitterdamascusretweets	3052	3869	Rossi (2012)	link	Retweets network on Twitter with the hashtag: "damascus". Nodes are users and edges are retweets. Data collected on 20/09/2012 from Truthy.
socialnetwork_twitterdashretweets	6288	7434	Rossi (2012)	link	Retweets network on Twitter with the hashtag: "dash". Nodes are users and edges are retweets. Data collected on 20/09/2012 from Truthy.
socialnetwork_twittergmanewsretweets	8373	8717	Rossi (2012)	link	Retweets network on Twitter with the hashtag: "gmanews". Nodes are users and edges are retweets. Data collected on 20/09/2012 from Truthy.
socialnetwork_twittergopretweets	4687	5529	Rossi (2012)	link	Retweets network on Twitter with the hashtag: "gop". Nodes are users and edges are retweets. Data collected on 20/09/2012 from Truthy.
socialnetwork_twitterHiggsmention	91606	125742	De Domenico (2013)	link	Mention network of other users during the spreading process on Twitter before, during and after the announcement of the discovery of the Higgs particle on 04/07/2012. The period considered is between 01/07/2012 and 07/07/2012.
socialnetwork_twitterHiggsreply	12839	14070	De Domenico (2013)	link	Reply network to existing tweets of the spreading process on Twitter before, during and after the announcement of the discovery of the Higgs particle on 04/07/2012. The period considered is between 01/07/2012 and 07/07/2012.
socialnetwork_twitterHiggsretweet	223833	307884	De Domenico (2013)	link	Retweet network of the spreading process on Twitter before, during and after the announcement of the discovery of the Higgs particle on 04/07/2012. The period considered is between 01/07/2012 and 07/07/2012.
socialnetwork_twitterhttpretweets	8917	10314	Rossi (2012)	link	Retweets network on Twitter with the hashtag: "http". Nodes are users and edges are retweets. Data collected on 20/09/2012 from Truthy.
socialnetwork_twitterislamretweets	4497	4616	Rossi (2012)	link	Retweets network on Twitter with the hashtag: "islam". Nodes are users and edges are retweets. Data collected on 20/09/2012 from Truthy.
socialnetwork_twitterisraelretweets	3698	4164	Rossi (2012)	link	Retweets network on Twitter with the hashtag: "israel". Nodes are users and edges are retweets. Data collected on 20/09/2012 from Truthy.
socialnetwork_twitterjustinbieberretweets	9405	9583	Rossi (2012)	link	Retweets network on Twitter with the hashtag: "justinbieber". Nodes are users and edges are retweets. Data collected on 20/09/2012 from Truthy.
socialnetwork_twitterksaretweets	7302	8107	Rossi (2012)	link	Retweets network on Twitter with the hashtag: "ksa". Nodes are users and edges are retweets. Data collected on 20/09/2012 from Truthy.
socialnetwork_twitterLadyGaga2010followers	87349	306249	Dong (2012)	link	We crawled a twitter dataset. To begin the collection process, we selected the most popular user on Twitter, i.e., “Lady Gaga”, and randomly collected 10,000 of her followers. We took these users as seed users and used a crawler to collect all followers of these users by traversing “following” relationships and these followers are viewed as the user list and the total number is 112,044. The crawl…
socialnetwork_twitterlebanonretweets	3961	4435	Rossi (2012)	link	Retweets network on Twitter with the hashtag: "lebanon". Nodes are users and edges are retweets. Data collected on 20/09/2012 from Truthy.
socialnetwork_twitterlibyaretweets	5067	5540	Rossi (2012)	link	Retweets network on Twitter with the hashtag: "libya". Nodes are users and edges are retweets. Data collected on 20/09/2012 from Truthy.
socialnetwork_twitterlolgopretweets	9765	10075	Rossi (2012)	link	Retweets network on Twitter with the hashtag: "lolgop". Nodes are users and edges are retweets. Data collected on 20/09/2012 from Truthy.
socialnetwork_twittermartinluther2013mentions	49609	60758	Omodei (2015)	link	Mentions network amoung users, obtained from Twitter during an exceptional event: the 50th aniversary of Marthin Luther King's speech "I have a dream..." in 2013. Start: 2013-08-25 15:41:36 End: 2013-09-02 10:16:21
socialnetwork_twittermartinluther2013replies	5298	5423	Omodei (2015)	link	Replies network amoung users, obtained from Twitter during an exceptional event: the 50th aniversary of Marthin Luther King's speech "I have a dream..." in 2013. Start: 2013-08-25 15:41:36 End: 2013-09-02 10:16:21
socialnetwork_twittermartinluther2013retweets	233228	254581	Omodei (2015)	link	Retweets network amoung users, obtained from Twitter during an exceptional event: the 50th aniversary of Marthin Luther King's speech "I have a dream..." in 2013. Start: 2013-08-25 15:41:36 End: 2013-09-02 10:16:21
socialnetwork_twittermittromneyretweets	7974	8534	Rossi (2012)	link	Retweets network on Twitter with the hashtag: "mittromney". Nodes are users and edges are retweets. Data collected on 20/09/2012 from Truthy.
socialnetwork_twitterobamaisrael2013retweets	1073208	1576878	Omodei (2015)	link	Retweets network amoung users, obtained from Twitter during an exceptional event: a visit to Israel by US President Barack Obama in 2013.Start: 2013-03-19 16:56:29 End: 2013-04-03 23:24:34
socialnetwork_twitterobamaretweets	3212	3422	Rossi (2012)	link	Retweets network on Twitter with the hashtag: "obama". Nodes are users and edges are retweets. Data collected on 20/09/2012 from Truthy.
socialnetwork_twitteroccupyretweets	3225	3939	Rossi (2012)	link	Retweets network on Twitter with the hashtag: "occupy". Nodes are users and edges are retweets. Data collected on 20/09/2012 from Truthy.
socialnetwork_twitteroccupywallstnycretweets	3609	3830	Rossi (2012)	link	Retweets network on Twitter with the hashtag: "occupywallstnyc". Nodes are users and edges are retweets. Data collected on 20/09/2012 from Truthy.
socialnetwork_twitteromanretweets	4904	6226	Rossi (2012)	link	Retweets network on Twitter with the hashtag: "oman". Nodes are users and edges are retweets. Data collected on 20/09/2012 from Truthy.
socialnetwork_twitteronedirectionretweets	7987	8100	Rossi (2012)	link	Retweets network on Twitter with the hashtag: "onedirection". Nodes are users and edges are retweets. Data collected on 20/09/2012 from Truthy.
socialnetwork_twitterp2retweets	4902	6016	Rossi (2012)	link	Retweets network on Twitter with the hashtag: "p2". Nodes are users and edges are retweets. Data collected on 20/09/2012 from Truthy.
socialnetwork_twitterpoliticalmentions	7175	11663	McKelvey (2012)	link	Political communication between users of the Twitter social media platform in the six weeks prior to the 2010 Congressional midterm elections. An edge exists if one user mention the other user in a tweet.
socialnetwork_twitterpoliticalretweets	18470	48053	McKelvey (2012)	link	Political communication between users of the Twitter social media platform in the six weeks prior to the 2010 Congressional midterm elections. An edge exists if one user retweets content produced by the other user.
socialnetwork_twitterqatifretweets	7537	8559	Rossi (2012)	link	Retweets network on Twitter with the hashtag: "qatif". Nodes are users and edges are retweets. Data collected on 20/09/2012 from Truthy.
socialnetwork_twittersaudiretweets	7252	8060	Rossi (2012)	link	Retweets network on Twitter with the hashtag: "saudi". Nodes are users and edges are retweets. Data collected on 20/09/2012 from Truthy.
socialnetwork_twittertcotretweets	4547	5501	Rossi (2012)	link	Retweets network on Twitter with the hashtag: "tcot". Nodes are users and edges are retweets. Data collected on 20/09/2012 from Truthy.
socialnetwork_twittertlotretweets	3665	4474	Rossi (2012)	link	Retweets network on Twitter with the hashtag: "tlot". Nodes are users and edges are retweets. Data collected on 20/09/2012 from Truthy.
socialnetwork_twitteruaeretweets	5248	6385	Rossi (2012)	link	Retweets network on Twitter with the hashtag: "uae". Nodes are users and edges are retweets. Data collected on 20/09/2012 from Truthy.
socialnetwork_twitterUNretweetsmentions2010	761	1029	Rossi (2012)	link	Retweets and mentions network from the UN conference held in Copenhagen. The data was collected over a two week period in 2010.
socialnetwork_twittervoteonedirectionretweets	2280	2464	Rossi (2012)	link	Retweets network on Twitter with the hashtag: "voteonedirection". Nodes are users and edges are retweets. Data collected on 20/09/2012 from Truthy.
socialnetwork_UCImessages	1893	13835	Opsahl (2009)	link	Sent messages between the users of an online community of students from the University of California, Irvine
socialnetwork_wikipediatalkDE	505468	1506048	Sun (2016)	link	Communication network of the German Wikipedia. Nodes represent users of the German Wikipedia, and an edge between users denotes that one user wrote a message on the talk page of the other user.
socialnetwork_wikipediatalkES	476465	1063981	Sun (2016)	link	Communication network of the Spanish Wikipedia. Nodes represent users of the Spanish Wikipedia, and an edge between users denotes that one user wrote a message on the talk page of the other user.
socialnetwork_wikipediatalkNL	224185	510471	Sun (2016)	link	Communication network of the Dutch Wikipedia. Nodes represent users of the Dutch Wikipedia, and an edge between users denotes that one user wrote a message on the talk page of the other user.
socialnetwork_wikipediatalkRU	449042	848988	Sun (2016)	link	Communication network of the Russian Wikipedia. Nodes represent users of the Russian Wikipedia, and an edge between users denotes that one user wrote a message on the talk page of the other user.
socialnetwork_wikipediathreadsDE	89146	727354	unpublished	link	Discussion threads on the German Wikipedia. Node of the network are users of the German Wikipedia. An edge between two users denotes that one user wrote a comment in a discussion as a reply to a comment of the other user.
socialnetwork_youtubecontact2008	13679	76741	Tang (2009)	link	Contact network between users on YouTube, a video sharing site. Dataset crawled on 12/2008.
socialnetwork_youtubefavoritevideos2008	13143	3797621	Tang (2009)	link	Network of shared favorite videos between two users on YouTube, a video sharing site. Dataset crawled on 12/2008.
socialnetwork_youtubesubscribers2008	10442	2239426	Tang (2009)	link	Network of shared subscribers between two users on YouTube, a video sharing site. Dataset crawled on 12/2008.
socialnetwork_youtubesubscriptions2008	11748	5574233	Tang (2009)	link	Network of shared subscriptions between two users on YouTube, a video sharing site. Dataset crawled on 12/2008.
trust_advogato	5042	39227	Massa (2005)	link	Trust relationships between users of Advogato, an online community platform for developers of free software launched in 1999.
trust_bitcoinalpha	3775	14120	Kumar (2016)	link	Trust network of people who trade using Bitcoin on a platform called Bitcoin Alpha.
trust_bitcoinOTC	5875	21489	Kumar (2016)	link	Trust network of people who trade using Bitcoin on a platform called Bitcoin OTC.
trust_epinions	75877	405739	Richardson (2003)	link	Trust network from the online social network Epinions. Nodes are users of Epinions and edges represent trust between the users.
trust_wikipediaEN	113123	2025910	Brandes (2009)	link	Network of conflicts between users of the English Wikipedia, for example users involved in an edit-war. A node represents a user and an edge represents a conflict between two users.
trust_wikipediapolitics	137740	715334	Maniu (2011)	link	Network of interactions (such as text editing, reverts, restores and votes) between the users of the English Wikipedia that have edited pages about politic. The result can be interpreted as a web of trust. An edge represents an interaction and a node represents a user. The dataset is based on a set of 563 articles from the politics domain of the English Wikipedia.
