# Supplementary material
Source: ML conference proceedings conference paper supplement (https://openreview.net/forum?id=fxxMReBRhi)
Supplement: supplementary_material [file ATLAS_temporal.xlsx]

## Sheet: Sheet1
name	N	E	reference	description
contact_SFHH_time	403	9565	link	This data set describes the face-to-face interactions of 405 participants to the 2009 SFHH conference in Nice, France (June 4-5, 2009).
contact_officefrance2013_time	92	755	link	Network of contacts between individuals measured in an office building in France, from 24/06/2013 to 3/07/2013. Active contacts during 20-second intervals of the data collection.
socialnetwork_enronemployees_time	150	1526	link	An Enron email dataset has been made public by the U.S. Department of Justice. Formed by employee names as well as email addresses.
socialnetwork_facebookforum_time	899	7036	link	The Facebook-like Forum Network was attained from the same online community as the online social network
contact_ACM2009_time	113	2196	link	Face-to-face contacts (active for at least 20 seconds) of the attendees of the ACM Conference on Hypertext and Hypermedia 2009
email_manufacturing_time	167	3250	link	Email communication network between employees of a mid-sized manufacturing company
contact_primaryschool_time	242	8317	link	A human contact network where nodes represent humans and edges between them represent proximity (i.e., contacts in the physical world).
contact_wirelesshaggle_time	274	2124	link	Contacts between people measured by carried wireless devices. A node represents a person and an edge between two persons shows that there was a contact between them
email_EUcore_time	986	16064	link	The network was generated using email data from a large European research institution.
email_DNC_time	1833	4366	link	Network of emails in the 2016 Democratic National Committee (DNC) email leak. Nodes in the network correspond to persons in the dataset. An edge denotes that the one node sent an email to the other node.
socialnetwork_UCImessages_time	1893	13835	link	Sent messages between the users of an online community of students from the University of California, Irvine
socialnetwork_retweets_time	18470	48053	link	Political communication between users of the Twitter social media platform in the six weeks prior to the 2010 Congressional midterm elections. An edge exists if one user retweets content produced by the other user.
socialnetwork_mathoverflow_time	24668	187939	link	Network of interactions on the stack exchange web site Math Overflow. The interactions can be: an user anwered to another user's question, an user commented on another user's question and an user commented on another user's answer.
ARK201012_time	29333	78054	link	AS Internet topology IPv4 changes from 09/2009 until 12/2010 (CAIDA Project)
